# Supplementary material for: Epigenomic and Other Evidence for Cannabis-Induced Aging Contextualized in a Synthetic Epidemiologic Overview of Cannabinoid-Related Teratogenesis and Cannabinoid-Related Carcinogenesis
Source: MDPI journal article supplement (doi:10.3390/ijerph192416721), 2022-12-13
Supplement: s1 [file s1]

## SUPPLEMENTARY TABLES

## Table of Contents

| Table Number | Subject                                               |
|--------------|-------------------------------------------------------|
|              |                                                       |
| S1           | Histone (Lysine) Methyltransferases                   |
| S2           | Histone (L:ysine) Demethylases                        |
| S3           | Histone Acetyltransferases                            |
| S4           | Histone Deacetylases                                  |
| S5           | Other Stem Cell Factors                               |
| S6           | Funtional Annotations of Kit                          |
| S7           | Age-Related Immunometabolic changes                   |
| S8           | Oocyte-Centrosome DNA Methylation Alterations         |
| S9           | Funtional Annotations of Kinesins                     |
| S10          | Funtional Annotations of Tubulins                     |
| S11          | Funtional Annotations of Tubulins - 2                 |
| S12          | Funtional Annotations of CENPN                        |
| S13          | Funtional Annotations of RAD51/52                     |
| S14          | Funtional Annotations of DSCAM                        |
| S15          | Funtional Annotations of DGALP2                       |
| S16          | Funtional Annotations of Slit                         |
| S17          | Funtional Annotations of Robo                         |
| S18          | Funtional Annotations of SRGAP2                       |
| S19          | Funtional Annotations of Alcohol Dehydrogenase (ALDH) |
| S20          | Funtional Annotations of Retinoid Receptors           |
| S21          | Funtional Annotations of Notch Receptors              |
| S22          | Funtional Annotations of VEGF, EFNB2                  |

|     |                                                                                                                     |
|-----|---------------------------------------------------------------------------------------------------------------------|
| S23 | P-Values of Teratological Significance from Schrott                                                                 |
| S24 | Annotations from the Schrott Database for Central Nervous System Abnormalities                                      |
| S25 | Annotations from the Schrott Database for Cardiovascular System Abnormalities                                       |
| S26 | Annotations from the Schrott Database for Orofacial Abnormalities                                                   |
| S27 | Annotations from the Schrott Database for General Abnormalities                                                     |
| S28 | Annotations from the Schrott Database for Limb Abnormalities                                                        |
| S29 | Annotations from the Schrott Database for Gastrointestinal System Abnormalities                                     |
| S30 | Annotations from the Schrott Database for Chromosomal Abnormalities                                                 |
| S31 | Annotations from the Schrott Database for Uronephrological System Abnormalities                                     |
| S32 | Annotations from the Schrott Database for Body Wall Abnormalities                                                   |
| S33 | Summary of Teratological Findings of Schrott Database by Organ System & Target                                      |
| S34 | Summary of Significance of Schrott DNA Methylation hits by Target                                                   |
| S35 | Significance Levels for Cancers from Schrott Dataset                                                                |
| S36 | Summary of Significance Levels for Overall Cancers from Schrott Dataset - Ordered by Minimum P-Value                |
| S37 | Summary of Significance Levels for Overall Cancers from Schrott Dataset - Ordered by Median P-Value                 |
| S38 | Summary of Significance Levels for Cancers in Cannabis Dependency from Schrott Dataset - Ordered by Minimum P-Value |
| S39 | Summary of Significance Levels for Cancers in Cannabis Dependency from Schrott Dataset - Ordered by Median P-Value  |
| S40 | Summary of Significance Levels for Cancers in Cannabis Withdrawal from Schrott Dataset - Ordered by Minimum P-Value |
| S41 | Summary of Significance Levels for Cancers in Cannabis Withdrawal from Schrott Dataset - Ordered by Median P-Value  |
| S42 | Contrast Between Gene Numbers and Significance Levels in Withdrawal and Dependency Ordered by Gene Number Ratio     |

Supplementary Table S1.: Cannabis Impacts on Histone Methyl transferase Enzymes, , Schrott EWAS Data.

| Nearest Gene Name | Nearest Gene Number | Status     | Page in Supplement | Chromosome Number | Relative Location | Distance to Nearest Gene (Bases) | P-Value  | Bonferroni-Adjusted P-Value |
|-------------------|---------------------|------------|--------------------|-------------------|-------------------|----------------------------------|----------|-----------------------------|
| KMT2C             | ENSG00000055609     | Withdrawal | 168                | 7                 | Intron            | 0                                | 3.28E-06 | 0.013565                    |
| CAMKMT            | ENSG00000143919     | Withdrawal | 175                | 2                 | Intron            | 0                                | 4.20E-06 | 0.015130                    |
| KMT5B             | ENSG00000055609     | Withdrawal | 211                | 11                | Intron            | 0                                | 1.10E-05 | 0.023897                    |
| KMT2E             | ENSG00000055609     | Withdrawal | 214                | 7                 | 5UTR              | 0                                | 1.17E-05 | 0.024460                    |
| KMT2A (MLL1)      | ENSG00000055609     | Withdrawal | 325                | 11                |                   |                                  | 1.28E-06 | -                           |
| KMT2A (MLL1)      | ENSG00000055609     | Withdrawal | 325                | 11                |                   |                                  | 1.65E-06 | -                           |
| KMT2A (MLL1)      | ENSG00000055609     | Withdrawal | 325                | 11                |                   |                                  | 3.59E-06 | -                           |
| KMT2A (MLL1)      | ENSG00000055609     | Withdrawal | 325                | 11                |                   |                                  | 4.79E-06 | -                           |
| KMT2A (MLL1)      | ENSG00000055609     | Withdrawal | 325                | 11                |                   |                                  | 5.84E-06 | -                           |
| KMT2A (MLL1)      | ENSG00000055609     | Withdrawal | 325                | 11                |                   |                                  | 7.17E-06 | -                           |
| KMT2A (MLL1)      | ENSG00000055609     | Withdrawal | 326                | 11                |                   |                                  | 7.45E-06 | -                           |
| KMT2A (MLL1)      | ENSG00000055609     | Withdrawal | 326                | 11                |                   |                                  | 7.71E-06 | -                           |
| KMT2A (MLL1)      | ENSG00000055609     | Withdrawal | 326                | 11                |                   |                                  | 8.42E-06 | -                           |
| KMT2A (MLL1)      | ENSG00000055609     | Withdrawal | 326                | 11                |                   |                                  | 8.46E-06 | -                           |
| KMT2A (MLL1)      | ENSG00000055609     | Withdrawal | 326                | 11                |                   |                                  | 9.16E-06 | -                           |
| KMT2A (MLL1)      | ENSG00000055609     | Withdrawal | 326                | 11                |                   |                                  | 9.54E-06 | -                           |
| KMT2A (MLL1)      | ENSG00000055609     | Withdrawal | 326                | 11                |                   |                                  | 1.27E-05 | -                           |
| KMT2A (MLL1)      | ENSG00000055609     | Withdrawal | 326                | 11                |                   |                                  | 1.38E-05 | -                           |
| KMT2A (MLL1)      | ENSG00000055609     | Withdrawal | 326                | 11                |                   |                                  | 1.60E-05 | -                           |
| KMT2A (MLL1)      | ENSG00000055609     | Withdrawal | 326                | 11                |                   |                                  | 2.06E-05 | -                           |
| KMT2A (MLL1)      | ENSG00000055609     | Withdrawal | 326                | 11                |                   |                                  | 2.47E-05 | -                           |
| KMT2A (MLL1)      | ENSG00000055609     | Withdrawal | 326                | 11                |                   |                                  | 3.42E-05 | -                           |

Supplementary Table S2.: Cannabis Impacts on Histone Demethylase Enzymes, Schrott EWAS Data.

| Nearest Gene Name | Nearest Gene Number | Status     | Page in Supplement | Chromosome Number | Relative Location | Distance to Nearest Gene (Bases) | P-Value  | Bonferroni-Adjusted P-Value |
|-------------------|---------------------|------------|--------------------|-------------------|-------------------|----------------------------------|----------|-----------------------------|
|                   |                     |            |                    |                   |                   |                                  |          |                             |
| KDM3B             | ENSG00000120733     | Dependence | 9                  | 5                 | Intron            | 0                                | 2.78E-08 | 0.001068                    |
| KDM4C             | ENSG00000107077     | Dependence | 11                 | 9                 | Intron            | 0                                | 6.88E-08 | 0.001754                    |
| KDM2A             | ENSG00000173120     | Dependence | 14                 | 11                | Intron            | 0                                | 1.17E-07 | 0.002352                    |
| KDM4B             | ENSG00000127663     | Dependence | 14                 | 19                | Intron            | 0                                | 1.37E-07 | 0.002528                    |
| KDM7A             | ENSG00000006459     | Dependence | 41                 | 7                 | Intron            | 0                                | 1.67E-06 | 0.009025                    |
| KDM4B             | ENSG00000127663     | Dependence | 48                 | 19                | Intron            | 0                                | 2.40E-06 | 0.010755                    |
| KDM5A             | ENSG00000073614     | Dependence | 50                 | 12                | Intron            | 0                                | 2.62E-06 | 0.011194                    |
| KDM2A             | ENSG00000173120     | Dependence | 56                 | 11                | Intron            | 0                                | 3.25E-06 | 0.012379                    |
| KDM4C             | ENSG00000107077     | Dependence | 107                | 9                 | Intron            | 0                                | 1.17E-05 | 0.022772                    |
| KDM5A             | ENSG00000073614     | Dependence | 123                | 12                | Intron            | 0                                | 1.12E-09 | 0.000216                    |
| KDM4C             | ENSG00000107077     | Withdrawal | 128                | 9                 | Intron            | 0                                | 5.49E-08 | 0.001756                    |
| KDM4C             | ENSG00000107077     | Withdrawal | 150                | 9                 | Intron            | 0                                | 1.30E-06 | 0.008774                    |
| KDM4B             | ENSG00000127663     | Dependence | 185                | 19                | Intron            | 0                                | 5.89E-06 | 0.017834                    |
| KDM4B             | ENSG00000127663     | Dependence | 187                | 19                | Intron            | 0                                | 6.22E-06 | 0.018347                    |
| KDM2B             | ENSG00000098094     | Dependence | 80                 | 12                | Intron            | 0                                | 8.92E-06 | 0.021771                    |
| KDM5B             | ENSG00000117139     | Dependence | 209                | 1                 | Intron            | 0                                | 1.05E-05 | 0.023365                    |
| KDM7A             | ENSG00000006459     | Dependence | 218                | 7                 | Intron            | 0                                | 1.26E-05 | 0.025401                    |
| KDM3B             | ENSG00000123733     | Dependence | 223                | 5                 | Intron            | 0                                | 1.40E-05 | 0.026649                    |
| KDM1A             | ENSG00000103365     | Withdrawal | 228                | 16                | Intron            | 0                                | 1.53E-05 | 0.027842                    |
| KDM2B             | ENSG00000098094     | Dependence | 239                | 12                | -                 | -                                | 7.73E-20 | -                           |
| KDM2B             | ENSG00000098094     | Dependence | 239                | 12                | -                 | -                                | 7.74E-20 | -                           |

Supplementary Table S3.: Cannabis Impacts on Histone Acetyltransferase Enzymes, Schrott EWAS Data.

| Nearest Gene Name | Nearest Gene Number | Status     | Page in Supplement | Chromosome Number | Relative Location | Distance to Nearest Gene (Bases) | P-Value  | Bonferroni-Adjusted P-Value |
|-------------------|---------------------|------------|--------------------|-------------------|-------------------|----------------------------------|----------|-----------------------------|
| KAT2A             | ENSG00000108773     | Dependence | 41                 | 17                | Intron            | 0                                | 1.68E-06 | 0.009061                    |
| KAT6A             | ENSG00000083168     | Dependence | 47                 | 8                 | Intron            | 0                                | 2.28E-06 | 0.010489                    |
| KAT6A             | ENSG00000083168     | Dependence | 72                 | 8                 | Intron            | 0                                | 5.45E-06 | 0.015911                    |
| KAT6B             | ENSG00000156650     | Dependence | 108                | 10                | Intron            | 0                                | 1.20E-05 | 0.023003                    |
| KAT6B             | ENSG00000156650     | Dependence | 145                | 10                | Intron            | 0                                | 8.48E-07 | 0.007138                    |
| KAT2B             | ENSG00000083168     | Withdrawal | 145                | 3                 | Intron            | 0                                | 8.98E-07 | 0.007355                    |
| KAT6B             | ENSG00000156650     | Withdrawal | 157                | 10                | Exon              | 0                                | 1.93E-06 | 0.010641                    |
| KATNAL1           | ENSG00000102781     | Withdrawal | 169                | 13                | Intron            | 0                                | 3.35E-06 | 0.013700                    |
| KAT6A             | ENSG00000083168     | Withdrawal | 179                | 8                 | Intron            | 0                                | 4.79E-06 | 0.016136                    |
| KAT6A             | ENSG00000083168     | Withdrawal | 179                | 8                 | Intron            | 0                                | 5.10E-06 | 0.016631                    |
| KAT6A             | ENSG00000083168     | Withdrawal | 195                | 8                 | Intron            | 0                                | 7.81E-06 | 0.020441                    |

Supplementary Table S4.: Cannabis Impacts on Histone Deacetylase Enzymes, Schrott EWAS Data.

| Nearest Gene Name | Nearest Gene Number | Status     | Page in Supplement | Chromosome Number | Relative Location | Distance to Nearest Gene (Bases) | P-Value  | Bonferroni-Adjusted P-Value |
|-------------------|---------------------|------------|--------------------|-------------------|-------------------|----------------------------------|----------|-----------------------------|
|                   |                     |            |                    |                   |                   |                                  |          |                             |
| HDAC4             | ENSG00000068024     | Dependence | 23                 | 2                 | Intron            | 0                                | 4.48E-07 | 0.004704                    |
| HDAC4             | ENSG00000108840     | Dependence | 78                 | 17                | Intron            | 0                                | 6.30E-06 | 0.017003                    |
| HDAC7             | ENSG00000068024     | Dependence | 84                 | 12                | Intron            | 0                                | 7.25E-06 | 0.018159                    |
| HDAC4             | ENSG00000068024     | Dependence | 115                | 2                 | Intron            | 0                                | 1.36E-05 | 0.024469                    |
| HDAC5             | ENSG00000108840     | Dependence | 117                | 17                | Exon              | 0                                | 1.42E-05 | 0.025057                    |
| HDAC4             | ENSG00000068024     | Withdrawal | 126                | 2                 | Intron            | 0                                | 3.15E-08 | 0.001319                    |
| HDAC9             | ENSG00000048052     | Withdrawal | 134                | 7                 | Intron            | 0                                | 2.35E-07 | 0.003687                    |
| HDAC9             | ENSG00000048052     | Withdrawal | 138                | 7                 | Intron            | 0                                | 4.44E-07 | 0.005163                    |
| HDAC2-AS2         | ENSG00000228624     | Withdrawal | 154                | 6                 | Intron            | 0                                | 1.61E-06 | 0.009713                    |
| HDAC4             | ENSG00000068024     | Withdrawal | 219                | 2                 | Intron            | 0                                | 1.29E-05 | 0.025639                    |
| HDAC9             | ENSG00000048052     | Withdrawal | 225                | 7                 | Intron            | 0                                | 1.44E-05 | 0.026972                    |

Supplementary Table S5.: Cannabis Impacts on Other Stem Cell Factors, Schrott EWAS Data.

| Nearest Gene Name | Chromosome Number | Nearest Gene Number | Dependency Status | Functional Annotation                    | Page | Distance from Nearest Gene | Relative Position | P-Value  | Bonferroni Adjusted P-Value |
|-------------------|-------------------|---------------------|-------------------|------------------------------------------|------|----------------------------|-------------------|----------|-----------------------------|
| <b>RAS</b>        |                   |                     |                   |                                          |      |                            |                   |          |                             |
| RasL12            | 15                | ENSG00000103710     | Dependence        | Ras like family 12                       | 17   | 0                          | Intron            | 2.09E-07 | 0.003191                    |
| RRAS2             | 11                | ENSG00000133818     | Dependence        | Ras related 2                            | 22   | 0                          | Intron            | 4.14E-07 | 0.004416                    |
| RASGEF1B          | 4                 | ENSG00000138670     | Dependence        | Ras GEF Domain Family 1B                 | 23   | 0                          | Intron            | 4.40E-07 | 0.004689                    |
| RASA2             | 3                 | ENSG00000155903     | Dependence        | Ras P21 protein activator                | 23   | 0                          | Intron            | 4.64E-07 | 0.004796                    |
| RASEF             | 9                 | ENSG00000165105     | Dependence        | Ras and EF-hand containing               | 26   | 40281                      | Downstream        | 6.31E-07 | 0.005559                    |
| RASGRF1           | 15                | ENSG00000058335     | Dependence        | Ras Guanine nucleotide Releasing Factor  | 28   | 0                          | Exon              | 7.30E-07 | 0.006022                    |
| RASD2             | 22                | ENSG00000100302     | Dependence        | Ras D family member 2                    | 52   | 21082                      | Downstream        | 2.73E-06 | 0.011384                    |
| RASSF3            | 12                | ENSG00000153179     | Dependence        | Ras Domain Family member 3               | 56   | 0                          | Intron            | 3.23E-06 | 0.012342                    |
| RASAL3            | 19                | ENSG00000105122     | Dependence        | Ras Activator like 3                     | 56   | 0                          | Intron            | 3.27E-06 | 0.012415                    |
| RASGEF1A          | 10                | ENSG00000198915     | Dependence        | Ras GEF Domain Family 1A                 | 78   | 0                          | Intron            | 6.27E-06 | 0.016972                    |
| RRAS              | 19                | ENSG00000126458     | Dependence        | Ras related                              | 90   | 0                          | Intron            | 8.44E-06 | 0.019488                    |
| RASA2             | 7                 | ENSG00000105808     | Dependence        | Ras P21 protein activator                | 93   | 0                          | Intron            | 8.91E-06 | 0.020018                    |
| RASGEF1B          | 4                 | ENSG00000138670     | Dependence        | Ras GEF Domain Family 1B                 | 93   | 0                          | Intron            | 9.05E-06 | 0.020169                    |
| RASAL2            | 1                 | ENSG00000075391     | Dependence        | Ras activator like 2                     | 97   | 0                          | Intron            | 9.73E-06 | 0.020864                    |
| RASGRP1           | 15                | ENSG00000172575     | Dependence        | Ras guanyl releasing protein 2           | 99   | 0                          | Intron            | 1.01E-05 | 0.021246                    |
| RASGRF2           | 5                 | ENSG00000113319     | Dependence        | Ras guanyl nucleotide releasing factor 2 | 114  | 0                          | Intron            | 1.33E-05 | 0.024247                    |
| RASAL2            | 1                 | ENSG00000075391     | Withdrawal        | Ras activator like 2                     | 130  | 0                          | Intron            | 1.14E-07 | 0.002516                    |
| RASSF8            | 12                | ENSG00000123094     | Withdrawal        | Ras Domain Family member 8               | 132  | 0                          | Intron            | 1.72E-07 | 0.003135                    |
| RASGEF1C          | 5                 | ENSG00000146090     | Withdrawal        | Ras GEF domain Family member 1C          | 133  | 0                          | Intron            | 1.99E-07 | 0.003406                    |
| <b>Catenins</b>   |                   |                     |                   |                                          |      |                            |                   |          |                             |
| CTNNBIP1          | 1                 | ENSG00000178585     | Dependence        | $\beta$ -Catenin binding protein 1       | 119  | 0                          | Intron            | 1.47E-05 | 0.025467                    |
| CTNNBIP1          | 1                 | ENSG00000178585     | Withdrawal        | $\beta$ -Catenin binding protein 1       | 173  | 0                          | Intron            | 3.85E-06 | 0.014531                    |
| CTNNB1            | 20                | ENSG00000132792     | Withdrawal        | $\beta$ -Catenin like 1                  | 216  | 0                          | Intron            | 1.22E-05 | 0.025042                    |
| CTNNB1            | 20                | ENSG00000132792     | Withdrawal        | $\beta$ -Catenin like 1                  | 226  | 0                          | Exon              | 1.48E-05 | 0.027346                    |
| CTNND2            | 5                 | ENSG00000169862     | Dependence        | $\Delta$ -Catenin 2                      | 16   | 0                          | Intron            | 1.77E-07 | 0.002917                    |
| CTNND2            | 5                 | ENSG00000169862     | Dependence        | $\Delta$ -Catenin 2                      | 239  |                            |                   | 7.73E-20 |                             |
| CTNND2            | 5                 | ENSG00000169862     | Dependence        | $\Delta$ -Catenin 2                      | 239  |                            |                   | 7.74E-20 |                             |
| CTNND2            | 5                 | ENSG00000169862     | Dependence        | $\Delta$ -Catenin 2                      | 240  |                            |                   | 3.34E-19 |                             |
| CTNND2            | 5                 | ENSG00000169862     | Dependence        | $\Delta$ -Catenin 2                      | 240  |                            |                   | 3.64E-19 |                             |
| MYBL1             | 8                 | ENSG00000185697     | Dependence        | Myb proto-oncogene like 1                | 177  | 0                          | Intron            | 4.41E-06 | 0.015546                    |
| <b>KIT</b>        |                   |                     |                   |                                          |      |                            |                   |          |                             |
| KIT               | 4                 | ENSG00000157404     | Withdrawal        | Kit proto-oncogene                       | 155  | 0                          | Intron            | 1.69E-06 | 0.009933                    |
| KITLG             | 12                | ENSG00000049130     | Withdrawal        | Kit Ligand                               | 193  | 0                          | Intron            | 7.35E-06 | 0.019897                    |
| GDF3              | 12                | ENSG00000184344     | Withdrawal        | Growth Differentiation factor 3          | 224  | 4362                       | Upstream          | 1.41E-05 | 0.026693                    |
| PAX7              | 1                 | ENSG00000009709     | Dependence        | Paired box 7                             | 91   | 0                          | Intron            | 1.13E-05 | 0.024114                    |
| PAX7              | 1                 | ENSG00000009709     | Dependence        | Paired box 7                             | 100  | 0                          | Intron            | 1.02E-05 | 0.021366                    |
| LIN28B            | 6                 | ENSG00000187772     | Dependence        | Lin-28 homologue B                       | 116  | 0                          | Intron            | 1.40E-05 | 0.024911                    |
| LIN28B            | 6                 | ENSG00000187772     | Withdrawal        | Lin-28 homologue B                       | 170  | 0                          | Intron            | 3.42E-06 | 0.013828                    |



Supplementary Table S6.: Cannabis Impacts on Kit Stem Cell Factors, Selected from 185 Hits, Schrott EWAS Data.

| Nearest Gene Name | Page | Functional Annotation    | Number Genes Identified | P-Value  |
|-------------------|------|--------------------------|-------------------------|----------|
| KITLG             | 239  | Head and neck cancer     | 356                     | 7.73E-20 |
| KITLG             | 239  | Head and neck cancer     | 342                     | 7.74E-20 |
| KITLG             | 240  | Head and neck cancer     | 333                     | 3.34E-19 |
| KITLG             | 240  | Abdominal carcinoma      | 362                     | 3.64E-19 |
| KITLG             | 241  | Solid cancer             | 381                     | 6.93E-18 |
| KITLG             | 241  | Thyroid cancer           | 318                     | 1.21E-17 |
| KITLG             | 242  | Thyroid cancer           | 319                     | 1.26E-17 |
| KITLG             | 242  | Endocrine tumour         | 321                     | 1.44E-17 |
| KITLG             | 243  | Adenocarcinoma           | 351                     | 1.91E-17 |
| KITLG             | 243  | Secretory cancer         | 339                     | 1.92E-17 |
| KITLG             | 244  | Abdominal adenocarcinoma | 346                     | 3.72E-17 |
| KITLG             | 244  | Malignant cancer         | 313                     | 5.76E-17 |
| KITLG             | 245  | Carcinoma                | 376                     | 6.96E-17 |
| KITLG             | 245  | Solid cancer             | 379                     | 7.21E-17 |
| KITLG             | 246  | Tumour frequency         | 315                     | 7.77E-17 |
| KITLG             | 246  | Abdominal cancer         | 364                     | 8.91E-17 |
| KITLG             | 247  | Endocrine tumour         | 327                     | 1.38E-16 |
| KITLG             | 247  | Carcinoma development    | 310                     | 1.72E-16 |

Supplementary Table S7.: Cannabis Impacts on Immunometabolic Stem Cell Factors, Schrott EWAS Data.

| Nearest Gene Name                                   | Chromosome Number | Nearest Gene Number | Dependency Status | Functional Annotation                   | Page | Distance from Nearest Gene | Relative Position | P-Value  | Bonferroni Adjusted P-Value |
|-----------------------------------------------------|-------------------|---------------------|-------------------|-----------------------------------------|------|----------------------------|-------------------|----------|-----------------------------|
|                                                     |                   |                     |                   |                                         |      |                            |                   |          |                             |
| <b>Calorie Restriction Immunometabolic Mediator</b> |                   |                     |                   |                                         |      |                            |                   |          |                             |
| PLA2G7                                              | 6                 | ENSG00000146070     | Withdrawal        | Phospholipase A2 Group VII              | 213  | 0                          | Intron            | 1.15E-05 | 0.024308                    |
|                                                     |                   |                     |                   |                                         |      |                            |                   |          |                             |
| <b>CXCL9, Chemokine of Immune Aging Index</b>       |                   |                     |                   |                                         |      |                            |                   |          |                             |
| CXCL13                                              | 4                 | ENSG00000156234     | Dependence        | CXC Motif chemokine ligand 13           | 90   | 0                          | Intron            | 8.44E-06 | 0.019488                    |
| CXCL13                                              | 4                 | ENSG00000156234     | Withdrawal        |                                         | 213  | 1069                       | Downstream        | 1.14E-05 | 0.024271                    |
|                                                     |                   |                     |                   |                                         |      |                            |                   |          |                             |
| <b>NAD Metabolism</b>                               |                   |                     |                   |                                         |      |                            |                   |          |                             |
| NAMPT                                               | 10                | ENSG00000229644     | Dependence        | Nicotinamide Phosphoribosyl Transferase | 10   | 41224                      | Upstream          | 5.98E-07 | 0.005441                    |

Supplementary Table S8.: Cannabis Impacts on Oocyte Meiotic Machinery, Schrott EWAS Data.

| Nearest Gene Name             | Chromosome Number | Nearest Gene Number | Dependency Status | Functional Annotation               | Page | Distance from Nearest Gene | Relative Position     | P-Value  | Bonferroni Adjusted P-Value |
|-------------------------------|-------------------|---------------------|-------------------|-------------------------------------|------|----------------------------|-----------------------|----------|-----------------------------|
| <b>Centrosomal Organizers</b> |                   |                     |                   |                                     |      |                            |                       |          |                             |
| NUMA1                         | 11                | ENSG00000137497     | Withdrawal        | Nuclear Mitotic Apparatus Protein 1 | 212  | 0                          | Exon                  | 1.13E-05 | 0.024154                    |
| CEP152                        | 15                | ENSG00000103995     | Withdrawal        | Centrosomal protein 152             | 195  | 0                          | Intron                | 7.64E-06 | 0.020250                    |
| CEP55                         | 10                | ENSG00000138180     | Dependence        | Centrosomal protein 55              | 27   | 13562                      | Downstream            | 6.71E-07 | 0.005734                    |
| <b>Motor Proteins</b>         |                   |                     |                   |                                     |      |                            |                       |          |                             |
| <b>Dynein - Dynactin</b>      |                   |                     |                   |                                     |      |                            |                       |          |                             |
| DYNC1H1                       | 14                | ENSG00000197102     | Withdrawal        | Dynein cytoplasmic 1 heavy chain 1  | 135  | 0                          | Exon                  | 2.69E-07 | 0.003989                    |
| DYNC1H1                       | 14                | ENSG00000197102     | Withdrawal        | Dynein cytoplasmic 1 heavy chain 1  | 150  | 0                          | Intron                | 1.33E-06 | 0.008933                    |
| DYNC1H1                       | 14                | ENSG00000197102     | Withdrawal        | Dynein cytoplasmic 1 heavy chain 1  | 186  | 0                          | Intron                | 6.04E-06 | 0.018039                    |
| DCTN4                         | 5                 | ENSG00000132912     | Dependence        | Dynactin subunit 4                  | 37   | 0                          | Intron                | 1.38E-06 | 0.008195                    |
| DCTN4                         | 5                 | ENSG00000132912     | Withdrawal        | Dynactin subunit 4                  | 131  | 327                        | Downstream            | 1.25E-07 | 0.002634                    |
| DCTN4                         | 5                 | ENSG00000132912     | Withdrawal        | Dynactin subunit 4                  | 151  | 0                          | Intron                | 1.40E-06 | 0.009142                    |
| DCTN4                         | 5                 | ENSG00000132912     | Withdrawal        | Dynactin subunit 4                  | 232  | 0                          | Intron                | 1.63E-05 | 0.028618                    |
| <b>Kinesin</b>                |                   |                     |                   |                                     |      |                            |                       |          |                             |
| KIFAP3                        | 1                 | ENSG00000075945     | Dependence        | Kinesin Associated protein 3        | 21   | 0                          | Intron                | 3.63E-07 | 0.004266                    |
| KIF26B                        | 1                 | ENSG00000162849     | Dependence        | Kinesin family member 26B           | 41   | 0                          | Intron                | 1.69E-06 | 0.009091                    |
| KIF2A                         | 5                 | ENSG00000068796     | Dependence        | Kinesin family member 2A            | 46   | 0                          | Intron                | 2.20E-06 | 0.010274                    |
| KIF26B                        | 1                 | ENSG00000162849     | Dependence        | Kinesin family member 26B           | 47   | 0                          | Intron                | 2.26E-06 | 0.010440                    |
| KIF27                         | 1                 | ENSG00000165115     | Dependence        | Kinesin family member 27            | 56   | 0                          | Exon                  | 3.24E-06 | 0.012349                    |
| KIFC3                         | 16                | ENSG00000140859     | Withdrawal        | Kinesin family member C3            | 173  | 0                          | 3 Untranslated region | 3.87E-06 | 0.014555                    |
| KIF14                         | 1                 | ENSG00000118193     | Withdrawal        | Kinesin family member 14            | 200  | 33155                      | Downstream            | 8.63E-06 | 0.021429                    |
| KIF13B                        | 1                 | ENSG00000197892     | Dependence        | Kinesin family member 13B           | 60   | 0                          | Intron                | 3.76E-06 | 0.013269                    |
| KIF13B                        | 6                 | ENSG00000197892     | Dependence        | Kinesin family member 13B           | 77   | 0                          | Intron                | 6.16E-06 | 0.016839                    |
| KIF3C                         | 2                 | ENSG00000137497     | Dependence        | Kinesin family member 3C            | 79   | 0                          | Intron                | 6.44E-06 | 0.017205                    |
| KIF26B                        | 1                 | ENSG00000162849     | Dependence        | Kinesin family member 26B           | 83   | 16530                      | Downstream            | 7.21E-06 | 0.018129                    |
| KIFC2                         | 8                 | ENSG00000167702     | Withdrawal        | Kinesin family member C2            | 221  | 0                          | Exon                  | 1.35E-05 | 0.026224                    |

Supplementary Table S9.: Cannabis Impacts on Oocyte Meiotic Machinery,  
Selected Kinesin Motors from 218 hits, Schrott EWAS Data.

| Nearest Gene Name | Page | Functional Annotation         | Number Genes Identified | P-Value  |
|-------------------|------|-------------------------------|-------------------------|----------|
| KIF13A            | 239  | Head and neck cancer          | 356                     | 7.73E-20 |
| KIF26A            | 239  | Head and neck cancer          | 356                     | 7.73E-20 |
| KIF13A            | 239  | Head and neck cancer          | 342                     | 7.74E-20 |
| KIF26A            | 239  | Head and neck cancer          | 342                     | 7.74E-20 |
| KIF13A            | 240  | Head and neck cancer          | 333                     | 3.34E-19 |
| KIF26A            | 240  | Head and neck cancer          | 333                     | 3.34E-19 |
| KIF13A            | 240  | Abdominal carcinoma           | 362                     | 3.64E-19 |
| KIF26A            | 240  | Abdominal carcinoma           | 362                     | 3.64E-19 |
| KIF13A            | 241  | Solid cancer                  | 381                     | 6.93E-18 |
| KIF26A            | 241  | Solid cancer                  | 381                     | 6.93E-18 |
| KIF13A            | 241  | Thyroid cancer                | 318                     | 1.21E-17 |
| KIF26A            | 241  | Thyroid cancer                | 318                     | 1.21E-17 |
| KIF13A            | 242  | Thyroid cancer                | 319                     | 1.26E-17 |
| KIF26A            | 242  | Thyroid cancer                | 319                     | 1.26E-17 |
| KIF13A            | 242  | Endocrine tumour              | 321                     | 1.44E-17 |
| KIF26A            | 242  | Endocrine tumour              | 321                     | 1.44E-17 |
| KIF13A            | 243  | Adenocarcinoma                | 351                     | 1.91E-17 |
| KIF26A            | 243  | Adenocarcinoma                | 351                     | 1.91E-17 |
| KIF13A            | 243  | Secretory Structure carcinoma | 339                     | 1.92E-17 |
| KIF26A            | 243  | Secretory Structure carcinoma | 339                     | 1.92E-17 |
| KIF13A            | 244  | Abdominal carcinoma           | 346                     | 3.72E-17 |
| KIF26A            | 244  | Abdominal carcinoma           | 346                     | 3.72E-17 |
| KIF13A            | 244  | Malignant cancer              | 313                     | 3.76E-17 |
| KIF26A            | 244  | Malignant cancer              | 313                     | 3.76E-17 |
| KIF13A            | 245  | Carcinoma                     | 376                     | 6.96E-17 |
| KIF26A            | 245  | Carcinoma                     | 376                     | 6.96E-17 |
| KIF13A            | 245  | Non-melanoma solid carcinoma  | 379                     | 7.21E-17 |
| KIF26A            | 245  | Non-melanoma solid carcinoma  | 379                     | 7.21E-17 |

Supplementary Table S10.: Cannabis Impacts on Tubulin and Tubulin Code Machinery, Schrott EWAS Data.

| Nearest Gene Name                               | Chromosome Number | Nearest Gene Number | Dependency Status | Functional Annotation                   | Function                                           | Page | Distance from Nearest Gene | Relative Position   | P-Value  | Bonferroni Adjusted P- |
|-------------------------------------------------|-------------------|---------------------|-------------------|-----------------------------------------|----------------------------------------------------|------|----------------------------|---------------------|----------|------------------------|
| <b>Tubulins</b>                                 |                   |                     |                   |                                         |                                                    |      |                            |                     |          |                        |
| TUBB4A                                          | 19                | ENSG00000104833     | Dependence        | Tubulin Beta 4A Class Iva               |                                                    | 115  | 2568                       | Upstream            | 1.36E-05 | 0.024542               |
| TUBB8                                           | 10                | ENSG00000261456     | Withdrawal        | Tubulin Beta 8 Class VIII               |                                                    | 183  | 0                          | Intron              | 5.43E-06 | 0.017137               |
| TUBD1                                           | 17                | ENSG00000108423     | Withdrawal        | Tubulin Delta 1                         |                                                    | 224  | 0                          | Exon                | 1.42E-05 | 0.026777               |
| <b>Tubulin Acetylation</b>                      |                   |                     |                   |                                         |                                                    |      |                            |                     |          |                        |
| ATAT1                                           | 6                 | ENSG00000137343     | Withdrawal        | Alpha Tubulin Acetyltransferase 1       |                                                    | 212  | 0                          | Intron              | 1.13E-05 | 0.024125               |
| <b>Tubulin Post-Translational Modifications</b> |                   |                     |                   |                                         |                                                    |      |                            |                     |          |                        |
| <b>Tyrosinylation / Detyrosinylation</b>        |                   |                     |                   |                                         |                                                    |      |                            |                     |          |                        |
| TTL                                             | 2                 | ENSG00000144999     | Withdrawal        | Tubulin Tyrosine Ligase                 | Tyrosinates detyrosinated $\alpha$ -tubulin        | 224  | 0                          | Intron              | 1.14E-05 | 0.026704               |
| VASH2                                           | 1                 | ENSG00000143494     | Dependence        | Vasohibin 2                             | Removes C-terminal tyrosine from $\alpha$ -tubulin | 17   | 0                          | Intron              | 2.60E-07 | 0.003175               |
| VASH1                                           | 14                | ENSG00000071246     | Withdrawal        | Vasohibin 1                             |                                                    | 174  | 0                          | Untranslated region | 3.98E-06 | 0.014735               |
| <b>Polyglutaminylation</b>                      |                   |                     |                   |                                         |                                                    |      |                            |                     |          |                        |
| TTLL7                                           | 1                 | ENSG00000137941     | Dependence        | Tubulin Tyrosine ligase like 7          | Polyglutamate ligation                             | 27   | 0                          | Intron              | 7.11E-07 | 0.005943               |
| TTLL5                                           | 14                | ENSG00000119685     | Dependence        | Tubulin Tyrosine ligase like 5          | Initiates polyglutamylolation                      | 47   | 0                          | Intron              | 2.24E-06 | 0.010392               |
| TTLL11                                          | 9                 | ENSG00000175746     | Dependence        | Tubulin Tyrosine ligase like 11         | Polyglutamate ligation of sperm flagella           | 47   | 0                          | Intron              | 2.25E-06 | 0.010416               |
| TTLL9                                           | 20                | ENSG00000131044     | Dependence        | Tubulin Tyrosine ligase like 9          | Polyglutamate ligation of sperm flagella           | 48   | 0                          | Intron              | 2.34E-06 | 0.010613               |
| TTLL5                                           | 14                | ENSG00000071246     | Dependence        | Tubulin Tyrosine ligase like 5          | Initiates polyglutamylolation                      | 53   | 2604                       | Upstream            | 2.87E-06 | 0.011632               |
| TTLL9                                           | 20                | ENSG00000131044     | Dependence        | Tubulin Tyrosine ligase like 9          | Polyglutamate ligation of sperm flagella           | 57   | 0                          | Intron              | 3.39E-06 | 0.012645               |
| TTLL6                                           | 17                | ENSG00000170703     | Dependence        | Tubulin Tyrosine ligase like 6          | Polyglutamate ligation                             | 57   | 332                        | Downstream          | 3.43E-06 | 0.012715               |
| TTLL11                                          | 9                 | ENSG00000175746     | Dependence        | Tubulin Tyrosine ligase like 11         | Polyglutamate ligation                             | 72   | 0                          | Intron              | 5.43E-06 | 0.015901               |
| TTLL10                                          | 1                 | ENSG00000162571     | Dependence        | Tubulin Tyrosine ligase like 10         | Protein glycation                                  | 85   | 0                          | Intron              | 7.59E-06 | 0.018620               |
| TTLL11                                          | 9                 | ENSG00000175746     | Dependence        | Tubulin Tyrosine ligase like 11         | Polyglutamate ligation                             | 95   | 87764                      | Downstream          | 9.38E-06 | 0.020509               |
| TTLL11                                          | 9                 | ENSG00000175746     | Dependence        | Tubulin Tyrosine ligase like 11         | Polyglutamate ligation                             | 121  | 0                          | Intron              | 1.51E-05 | 0.025795               |
| TTLL1                                           | 22                | ENSG00000100271     | Withdrawal        | TTL Family tubulin Polyglutamylase      | Polyglutamate ligation                             | 157  | 0                          | Intron              | 1.98E-06 | 0.010753               |
| TTLL10                                          | 1                 | ENSG00000162571     | Withdrawal        | Tubulin Tyrosine ligase like 10         | Protein glycation                                  | 179  | 1682                       | Downstream          | 4.86E-06 | 0.016245               |
| TTLL5                                           | 14                | ENSG00000119685     | Withdrawal        | Tubulin Tyrosine ligase like 5          | Initiates polyglutamylolation                      | 181  | 0                          | Intron              | 5.19E-06 | 0.016760               |
| TTLL11-IT1                                      | 9                 | ENSG00000237548     | Withdrawal        | Tubulin Tyrosine ligase like 11 Inc RNA |                                                    | 183  | 0                          | Intron              | 5.38E-06 | 0.019046               |
| TTLL12                                          | 22                | ENSG00000100304     | Withdrawal        | Tubulin Tyrosine ligase like 12         | Inhibits detyrosination and polyglutaminylation    | 230  | 375                        | Downstream          | 1.57E-05 | 0.028092               |

Supplementary Table S11.: Cannabis Impacts on  $\beta$ -Tubulin, Selected from 86 hits, Schrott EWAS Data.

| Nearest Gene Name | Nearest Gene Full Name | Gene Number     | Page | Functional Annotation | Number Genes Identified | P-Value  |
|-------------------|------------------------|-----------------|------|-----------------------|-------------------------|----------|
|                   |                        |                 |      |                       |                         |          |
| TUBB6             | Tubulin Beta 6 Class V | ENSG00000176014 | 239  | Head and neck cancer  | 356                     | 7.73E-20 |
| TUBB6             | Tubulin Beta 6 Class V | ENSG00000176014 | 239  | Head and neck cancer  | 342                     | 7.74E-20 |
| TUBB6             | Tubulin Beta 6 Class V | ENSG00000176014 | 240  | Head and neck cancer  | 333                     | 3.34E-19 |
| TUBB6             | Tubulin Beta 6 Class V | ENSG00000176014 | 240  | Abdominal carcinoma   | 362                     | 3.64E-19 |
| TUBB6             | Tubulin Beta 6 Class V | ENSG00000176014 | 241  | Solid cancer          | 381                     | 6.93E-18 |
| TUBB6             | Tubulin Beta 6 Class V | ENSG00000176014 | 241  | Thyroid cancer        | 318                     | 1.21E-17 |
| TUBB6             | Tubulin Beta 6 Class V | ENSG00000176014 | 242  | Thyroid cancer        | 319                     | 1.26E-17 |
| TUBB6             | Tubulin Beta 6 Class V | ENSG00000176014 | 242  | Endocrine tumour      | 321                     | 1.44E-17 |
| TUBB6             | Tubulin Beta 6 Class V | ENSG00000176014 | 243  | Adenocarcinoma        | 351                     | 1.91E-17 |
| TUBB6             | Tubulin Beta 6 Class V | ENSG00000176014 | 243  | carcinoma             | 339                     | 1.92E-17 |
| TUBB6             | Tubulin Beta 6 Class V | ENSG00000176014 | 244  | Abdominal carcinoma   | 346                     | 3.72E-17 |
| TUBB6             | Tubulin Beta 6 Class V | ENSG00000176014 | 244  | Malignant cancer      | 313                     | 3.76E-17 |
| TUBB6             | Tubulin Beta 6 Class V | ENSG00000176014 | 245  | Carcinoma             | 376                     | 6.96E-17 |
| TUBB6             | Tubulin Beta 6 Class V | ENSG00000176014 | 245  | carcinoma             | 379                     | 7.21E-17 |
| TUBB6             | Tubulin Beta 6 Class V | ENSG00000176014 | 246  | Cancer frequency      | 315                     | 7.70E-18 |
| TUBB6             | Tubulin Beta 6 Class V | ENSG00000176014 | 246  | Abdominal carcinoma   | 364                     | 8.91E-17 |
| TUBB6             | Tubulin Beta 6 Class V | ENSG00000176014 | 247  | Endocrine tumour      | 327                     | 1.38E-16 |
| TUBB6             | Tubulin Beta 6 Class V | ENSG00000176014 | 247  | Carcinoma development | 310                     | 1.72E-16 |

Supplementary Table S12.: Cannabis Impacts on Centrosomal Protein N,  
Selected from 86 hits, Schrott EWAS Data.

| Nearest Gene Name | Nearest Gene Number | Chromosome Number | Dependency Status | Functional Annotation      | Page | Number Genes Identified | P-Value  |
|-------------------|---------------------|-------------------|-------------------|----------------------------|------|-------------------------|----------|
| CENPN             | ENSG00000166451     | 16                | Dependence        | Head and Neck Cancer       | 239  | 356                     | 7.73E-20 |
| CENPN             | ENSG00000166451     | 16                | Dependence        | Head and Neck Cancer       | 239  | 342                     | 7.74E-20 |
| CENPN             | ENSG00000166451     | 16                | Dependence        | Head and Neck Cancer       | 240  | 333                     | 3.34E-19 |
| CENPN             | ENSG00000166451     | 16                | Dependence        | Abdominal carcinoma        | 240  | 362                     | 3.64E-19 |
| CENPN             | ENSG00000166451     | 16                | Dependence        | Cancer                     | 241  | 381                     | 6.93E-18 |
| CENPN             | ENSG00000166451     | 16                | Dependence        | Thyroid carcinoma          | 241  | 318                     | 1.21E-17 |
| CENPN             | ENSG00000166451     | 16                | Dependence        | Secretory structure cancer | 243  | 339                     | 1.92E-17 |
| CENPN             | ENSG00000166451     | 16                | Dependence        | Malignant Cancer           | 244  | 313                     | 5.67E-17 |
| CENPN             | ENSG00000166451     | 16                | Dependence        | Carcinoma                  | 245  | 376                     | 6.96E-17 |
| CENPN             | ENSG00000166451     | 16                | Dependence        | Non-melanoma solid cancer  | 245  | 379                     | 7.21E-17 |
| CENPN             | ENSG00000166451     | 16                | Dependence        | Frequency of Tumour        | 246  | 315                     | 7.73E-17 |
| CENPN             | ENSG00000166451     | 16                | Dependence        | Abdominal cancer           | 246  | 364                     | 8.91E-17 |
| CENPN             | ENSG00000166451     | 16                | Dependence        | Endocrine gland cancer     | 247  | 327                     | 1.38E-16 |
| CENPN             | ENSG00000166451     | 16                | Dependence        | Cancer development         | 247  | 310                     | 1.72E-16 |
| CENPN             | ENSG00000166451     | 16                | Dependence        | Epithelial Tumourigenesis  | 248  | 312                     | 1.74E-16 |
| CENPN             | ENSG00000166451     | 16                | Dependence        | Endocrine cancer           | 249  | 323                     | 3.74E-16 |
| CENPN             | ENSG00000166451     | 16                | Dependence        | Gastrointestinal cancer    | 249  | 325                     | 4.60E-16 |
| CENPN             | ENSG00000166451     | 16                | Dependence        | Abdominal cancer           | 250  | 365                     | 5.17E-16 |
| CENPN             | ENSG00000166451     | 16                | Dependence        | Digestive system cancer    | 250  | 349                     | 7.78E-16 |
| CENPN             | ENSG00000166451     | 16                | Dependence        | Digestive system cancer    | 251  | 382                     | 8.26E-16 |



Supplementary Table S13.: Cannabis Impacts on RAD51/52, Schrott EWAS Data.

| Nearest Gene Name                                 | Nearest Gene Number | Status     | Page in Supplement | Chromosome Number | Relative Location | Distance to Nearest Gene (Bases) | P-Value  | Bonferroni-Adjusted P-Value |
|---------------------------------------------------|---------------------|------------|--------------------|-------------------|-------------------|----------------------------------|----------|-----------------------------|
|                                                   |                     |            |                    |                   |                   |                                  |          |                             |
| <b>RAD51 - Homologous Recombination</b>           |                     |            |                    |                   |                   |                                  |          |                             |
| RAD51B                                            | ENSG00000182185     | Dependence | 28                 | 14                | Intron            | 0                                | 7.33E-07 | 0.006027                    |
| RAD51B                                            | ENSG00000182185     | Dependence | 94                 | 14                | Intron            | 0                                | 9.09E-06 | 0.020192                    |
| RAD51B                                            | ENSG00000182185     | Withdrawal | 131                | 14                | Intron            | 0                                | 1.33E-07 | 0.002722                    |
| RAD51B                                            | ENSG00000182185     | Withdrawal | 135                | 14                | Intron            | 0                                | 2.98E-07 | 0.004182                    |
| RAD51B                                            | ENSG00000182185     | Withdrawal | 154                | 14                | Intron            | 0                                | 1.68E-06 | 0.009923                    |
| RAD51B                                            | ENSG00000182185     | Withdrawal | 158                | 14                | Intron            | 0                                | 2.13E-06 | 0.000899                    |
| RAD51B                                            | ENSG00000182185     | Withdrawal | 174                | 14                | Intron            | 0                                | 4.02E-06 | 0.014760                    |
| RAD51B                                            | ENSG00000182185     | Withdrawal | 188                | 14                | Intron            | 0                                | 6.38E-06 | 0.018632                    |
| RAD51B                                            | ENSG00000182185     | Withdrawal | 222                | 14                | Intron            | 0                                | 1.36E-05 | 0.262866                    |
|                                                   |                     |            |                    |                   |                   |                                  |          |                             |
| <b>RAD52 - Microhomology-Mediated End Joining</b> |                     |            |                    |                   |                   |                                  |          |                             |
| RAD52                                             | ENSG00000002016     | Dependence | 102                | 12                | Intron            | 0                                | 1.07E-05 | 0.021847                    |



Supplementary Table S14.: Cannabis Impacts on DSCAM, Schrott EWAS Data.

| Nearest Gene Name | Chromosome Number | Page | Distance to Nearest Gene | Relative Location | Addictive Status | Nearest Gene Number | P-Value  | Bonferroni - Adjusted P-Value |
|-------------------|-------------------|------|--------------------------|-------------------|------------------|---------------------|----------|-------------------------------|
|                   |                   |      |                          |                   |                  |                     |          |                               |
| DSCAML1           | 11                | 5    | 0                        | Intron            | Dependence       | ENSG00000177103     | 2.22E-09 | 0.000267                      |
| DSCAM             | 21                | 63   | 0                        | Intron            | Dependence       | ENSG00000171587     | 4.14E-06 | 0.013908                      |
| DSCAM             | 21                | 73   | 0                        | Intron            | Dependence       | ENSG00000171587     | 5.57E-06 | 0.016085                      |
| DSCAM             | 21                | 82   | 0                        | Intron            | Dependence       | ENSG00000171587     | 7.08E-06 | 0.017985                      |
| DSCAM             | 21                | 113  | 28301                    | Downstream        | Dependence       | ENSG00000171587     | 1.31E-05 | 0.024044                      |
| DSCAM             | 21                | 114  | 0                        | Intron            | Dependence       | ENSG00000171587     | 1.35E-05 | 0.024385                      |
| DSCAML1           | 21                | 132  | 0                        | Intron            | Withdrawal       | ENSG00000177103     | 1.47E-07 | 0.002867                      |
| DSCAM             | 21                | 163  | 0                        | Intron            | Withdrawal       | ENSG00000171587     | 2.61E-06 | 0.012188                      |
| DSCAM             | 21                | 163  | 0                        | Intron            | Withdrawal       | ENSG00000171587     | 2.62E-06 | 0.012197                      |
| DSCAM             | 21                | 180  | 0                        | Intron            | Withdrawal       | ENSG00000171587     | 5.00E-06 | 0.016505                      |
| DSCAM             | 21                | 181  | 0                        | Intron            | Withdrawal       | ENSG00000171587     | 5.10E-06 | 0.016631                      |
| DSCAM             | 21                | 203  | 0                        | Intron            | Withdrawal       | ENSG00000171587     | 9.30E-06 | 0.022132                      |
| DSCAM             | 21                | 214  | 0                        | Intron            | Withdrawal       | ENSG00000171587     | 1.16E-05 | 0.024457                      |
| DSCAM             | 21                | 230  | 0                        | Intron            | Withdrawal       | ENSG00000171587     | 1.57E-05 | 0.028126                      |

Supplementary Table S15.: Cannabis Impacts on DLGAP2, Schrott EWAS Data.

| Nearest Gene Name | Chromosome Number | Page | Distance to Nearest Gene | Relative Location | Addictive Status | Nearest Gene Number | P-Value  | Bonferroni - Adjusted P-Value |
|-------------------|-------------------|------|--------------------------|-------------------|------------------|---------------------|----------|-------------------------------|
|                   |                   |      |                          |                   |                  |                     |          |                               |
| DLGAP2            | 8                 | 30   | 0                        | Intron            | Dependence       | ENSG000000198101    | 8.64E-07 | 0.006523                      |
| DLGAP2            | 8                 | 77   | 0                        | Intron            | Dependence       | ENSG000000198101    | 6.24E-06 | 0.016936                      |
| DLGAP2            | 8                 | 123  | 0                        | Exon              | Withdrawal       | ENSG000000198101    | 1.38E-09 | 0.000244                      |
| DLGAP2            | 8                 | 147  | 0                        | Exon              | Withdrawal       | ENSG000000198101    | 1.32E-09 | 0.000244                      |
| DLGAP2            | 8                 | 163  | 0                        | Intron            | Withdrawal       | ENSG000000198101    | 1.03E-06 | 0.007912                      |
| DLGAP2            | 8                 | 197  | 0                        | Intron            | Withdrawal       | ENSG000000198101    | 8.16E-06 | 0.020881                      |
| DLGAP2            | 8                 | 214  | 0                        | Intron            | Withdrawal       | ENSG000000198101    | 1.18E-05 | 0.024556                      |
| DLGAP2            | 8                 | 230  | 0                        | Intron            | Withdrawal       | ENSG000000198101    | 1.59E-05 | 0.028299                      |

Supplementary Table S16.: Cannabis Impacts on Slit Signalling, Schrott EWAS Data.

| Nearest Gene Name | Chromosome Number | Page | Number of Annotations | Distance to Nearest Gene | Relative Location | Addictive Status | Nearest Gene Number | P-Value  | Bonferroni - Adjusted P-Value |
|-------------------|-------------------|------|-----------------------|--------------------------|-------------------|------------------|---------------------|----------|-------------------------------|
|                   |                   |      |                       |                          |                   |                  |                     |          |                               |
| ARHGAP19-SLIT1    | 10                | 25   | 1                     | 0                        | Intron            | Dependence       | ENSG00000269891     | 5.46E-07 | 0.005200                      |
| ARHGAP19-SLIT1    | 10                | 207  | 1                     | 0                        | Intron            | Withdrawal       | ENSG00000269891     | 1.03E-05 | 0.023094                      |
| SLIT2             | 4                 | 145  | 1                     | 14853                    | Downstream        | Withdrawal       | ENSG00000145147     | 8.65E-07 | 0.007217                      |
| SLIT3             | 5                 | 72   | 1                     | 0                        | Intron            | Dependence       | ENSG00000184347     | 5.44E-06 | 0.015907                      |
| SLITRK1           | 13                | 107  | 162                   | 33311                    | Downstream        | Dependence       | ENSG00000178235     | 1.18E-05 | 0.022816                      |

Supplementary Table S17.: Cannabis Impacts on Robo, Schrott EWAS Data.

| Nearest Gene Name | Chromosome Number | Page | Distance to Nearest Gene | Relative Location | Addictive Status | Nearest Gene Number | P-Value      | Bonferroni - Adjusted P-Value |
|-------------------|-------------------|------|--------------------------|-------------------|------------------|---------------------|--------------|-------------------------------|
| <b>ROBO1</b>      |                   |      |                          |                   |                  |                     |              |                               |
| ROBO1             | 3                 | 22   | 0                        | Intron            | Dependence       | ENCG00000169855     | 4.08E-07     | 0.004487                      |
| ROBO1             | 3                 | 34   | 0                        | Intron            | Dependence       | ENCG00000169855     | 1.10E-06     | 0.007347                      |
| ROBO1             | 3                 | 179  | 0                        | Intron            | Withdrawal       | ENCG00000169855     | 4.75E-06     | 0.016077                      |
| ROBO1             | 3                 | 75   | 0                        | Intron            | Dependence       | ENCG00000169855     | 5.83E-06     | 0.016430                      |
| ROBO1             | 3                 | 82   | 1176                     | Downstream        | Dependence       | ENCG00000169855     | 7.09E-06     | 0.017986                      |
| ROBO1             | 3                 | 103  | 0                        | Intron            | Dependence       | ENCG00000169855     | 1.10E-05     | 0.022061                      |
| ROBO1             | 3                 | 118  | 90264                    | Upstream          | Dependence       | ENCG00000169855     | 1.46E-05     | 0.025364                      |
| <b>ROBO2</b>      |                   |      |                          |                   |                  |                     |              |                               |
| ROBO2             | 3                 | 8    | 0                        | Intron            | Dependence       | ENCG00000185008     | 1.72E-08     | 0.000855                      |
| ROBO2             | 3                 | 17   | 0                        | Intron            | Dependence       | ENCG00000185008     | 2.30E-07     | 0.003353                      |
| ROBO2             | 3                 | 139  | 0                        | Intron            | Withdrawal       | ENCG00000185008     | 4.68E-07     | 0.005298                      |
| ROBO2             | 3                 | 149  | 0                        | Intron            | Withdrawal       | ENCG00000185008     | 1.20E-06     | 0.008443                      |
| ROBO2             | 3                 | 167  | 0                        | Intron            | Withdrawal       | ENCG00000185008     | 3.15E-06     | 0.013257                      |
| ROBO2             | 3                 | 66   | 0                        | Intron            | Dependence       | ENCG00000185008     | 4.52E-06     | 0.014551                      |
| ROBO2             | 3                 | 200  | 0                        | Intron            | Withdrawal       | ENCG00000185008     | 8.80E-06     | 0.021641                      |
| ROBO2             | 3                 | 204  | 0                        | Intron            | Withdrawal       | ENCG00000185008     | 9.48E-06     | 0.022315                      |
| ROBO2             | 3                 | 106  | 0                        | Intron            | Dependence       | ENCG00000185008     | 1.16E-05     | 0.022679                      |
| ROBO2             | 3                 | 223  | 0                        | Intron            | Withdrawal       | ENCG00000185008     | 1.40E-05     | 0.026641                      |
| ROBO2             | 3                 | 149  | 0                        | Intron            | Withdrawal       | ENCG00000185008     | 1.20E-06     | 0.084427                      |
| <b>ROBO4</b>      |                   |      |                          |                   |                  |                     |              |                               |
| ROBO4             | 11                | 230  | 0                        | Intron            | Withdrawal       | ENCG00000154133     | 1.59E-05     | 0.028295                      |
|                   |                   |      |                          |                   |                  |                     |              |                               |
|                   |                   |      |                          |                   |                  |                     |              |                               |
| Nearest Gene Name | Chromosome        | Page | Fold Enrichment          | Status            | Nearest Gene     | P-Value             | P-Bonferroni | P-False Discovery Rate        |
| ROBO1             | 3                 | 237  | 1.7082                   | Dependence        | ENCG00000169855  | 1.12E-02            | 0.9504       | 0.001219                      |
| ROBO2             | 3                 | 237  | 1.7082                   | Dependence        | ENCG00000185008  | 1.12E-02            | 0.9504       | 0.001219                      |

Supplementary Table S18.: Cannabis Impacts on SRGAP2, Schrott EWAS Data.

| Nearest Gene Name | Chromosome Number | Page | Distance to Nearest Gene | Relative Location | Addictive Status | Nearest Gene Number | P-Value  | Bonferroni - Adjusted P-Value |
|-------------------|-------------------|------|--------------------------|-------------------|------------------|---------------------|----------|-------------------------------|
|                   |                   |      |                          |                   |                  |                     |          |                               |
| <b>SRGAP2C</b>    |                   |      |                          |                   |                  |                     |          |                               |
| SRGAP2C           | 1                 | 131  | 0                        | Intron            | Withdrawal       | ENSG00000171943     | 1.42E-07 | 0.002813                      |
| SRGAP2C           | 1                 | 132  | 0                        | Intron            | Withdrawal       | ENSG00000171943     | 1.77E-07 | 0.003195                      |
|                   |                   |      |                          |                   |                  |                     |          |                               |
| <b>SRGAP2B</b>    |                   |      |                          |                   |                  |                     |          |                               |
| SRGAP2B           | 1                 | 94   | 0                        | Intron            | Dependence       | ENSG00000196369     | 9.24E-06 | 0.020367                      |
| SRGAP2B           | 1                 | 151  | 0                        | Intron            | Withdrawal       | ENSG00000196369     | 1.41E-06 | 0.009159                      |
| SRGAP2B           | 1                 | 152  | 0                        | Intron            | Withdrawal       | ENSG00000196369     | 1.46E-06 | 0.009282                      |
| SRGAP2B           | 1                 | 163  | 0                        | Intron            | Withdrawal       | ENSG00000196369     | 2.56E-06 | 0.012098                      |
| SRGAP2B           | 1                 | 174  | 0                        | Intron            | Withdrawal       | ENSG00000196369     | 3.97E-06 | 0.014721                      |

Supplementary Table S19.: Cannabis Impacts on ALDH, Schrott EWAS Data.

| Nearest Gene Name | Nearest Gene    | Status     | Page in Supplement | Chromosome Number | Relative Location | Distance to Nearest Gene (Bases) | P-Value  | Bonferroni-Adjusted P-Value |
|-------------------|-----------------|------------|--------------------|-------------------|-------------------|----------------------------------|----------|-----------------------------|
|                   |                 |            |                    |                   |                   |                                  |          |                             |
| ALDH1A1           | ENSG00000165092 | Dependence | 48                 | 9                 | Intron            | 0                                | 2.36E-06 | 0.010662                    |
| ALDH1A2           | ENSG00000128918 | Dependence | 55                 | 15                | Downstream        | 672                              | 3.10E-06 | 0.012043                    |
| ALDH1A2           | ENSG00000128918 | Dependence | 77                 | 15                | Intron            | 0                                | 6.23E-06 | 0.016917                    |
| ALDH1L1           | ENSG00000144908 | Dependence | 101                | 3                 | Intron            | 0                                | 1.06E-05 | 0.021663                    |
| ALDH18A1          | ENSG00000059573 | Withdrawal | 138                | 10                | Downstream        | 283                              | 4.42E-07 | 0.005163                    |
| ALDH18A1          | ENSG00000059573 | Withdrawal | 152                | 10                | Intron            | 0                                | 1.47E-06 | 0.009315                    |
| ALDH1A2           | ENSG00000128918 | Withdrawal | 157                | 15                | Intron            | 0                                | 1.96E-06 | 0.010692                    |
| ALDH1A2           | ENSG00000128918 | Withdrawal | 191                | 15                | Intron            | 0                                | 7.01E-06 | 0.019426                    |
| ALDH1A2           | ENSG00000128918 | Withdrawal | 192                | 15                | Intron            | 0                                | 7.11E-06 | 0.019685                    |
| ALDH1A2           | ENSG00000128918 | Withdrawal | 196                | 15                | Downstream        | 38465                            | 7.95E-06 | 0.020609                    |
| ALDH1A1           | ENSG00000165092 | Withdrawal | 234                | 9                 | Intron            | 0                                | 1.70E-05 | 0.029127                    |
| CDH8              | ENSG00000150394 | Dependence | 65                 | 16                | Intron            | 0                                | 4.37E-06 | 0.014300                    |
| PCDH17            | ENSG00000118946 | Dependence | 239                | 13                |                   |                                  | 7.73E-20 |                             |

Supplementary Table S20.: Cannabis Impacts on Retinoid Receptor Signalling, Schrott EWAS Data.

| Nearest Gene Name | Nearest Gene Number | Status     | Page in Supplement | Chromosome Number | Relative Location | Distance to Nearest Gene (Bases) | P-Value  | Bonferroni-Adjusted P-Value |
|-------------------|---------------------|------------|--------------------|-------------------|-------------------|----------------------------------|----------|-----------------------------|
|                   |                     |            |                    |                   |                   |                                  |          |                             |
| RXRA              | ENSG00000261150     | Withdrawal | 125                | 9                 | Intron            | 0                                | 1.48E-08 | 0.000884                    |
| RXRG              | ENSG00000143171     | Withdrawal | 136                | 1                 | Downstream        | 2668                             | 3.40E-07 | 0.004522                    |
| RXRA              | ENSG00000186350     | Withdrawal | 144                | 9                 | Intron            | 0                                | 8.40E-07 | 0.007110                    |
| RORB              | ENSG00000186350     | Dependence | 88                 | 9                 | Intron            | 0                                | 8.03E-06 | 0.019099                    |
| RARB              | ENSG00000077092     | Dependence | 3                  | 73                | Intron            | 0                                | 5.54E-06 | 0.016036                    |
| RARB              | ENSG00000077092     | Withdrawal | 3                  | 73                | Intron            | 0                                | 7.94E-09 | 0.000631                    |
| RARB              | ENSG00000077092     | Withdrawal | 3                  | 73                | Intron            | 0                                | 3.25E-06 | 0.013509                    |
| RARB              | ENSG00000077092     | Withdrawal | 3                  | 73                | Intron            | 0                                | 6.98E-06 | 0.019332                    |
| RARB              | ENSG00000077092     | Withdrawal | 3                  | 73                | Intron            | 0                                | 1.20E-05 | 0.024854                    |

Supplementary Table S21.: Cannabis Impacts on Notch Signalling, Schrott EWAS Data.

| Nearest Gene Name | Nearest Gene Number | Page | Annotation         | Chromosome Number | Dependency Status | Distance to Nearest Gene | Relative Position       | P-Value  | Bonferroni Adjusted P-Value |
|-------------------|---------------------|------|--------------------|-------------------|-------------------|--------------------------|-------------------------|----------|-----------------------------|
| JAG1              | ENSG00000101384     | 36   | Notch Ligand       | 20                | Dependence        | 0                        | Intron                  | 1.31E-06 | 0.007992                    |
| NOTCH2            | ENSG00000134250     | 55   | Notch Pathway      | 1                 | Dependence        | 0                        | Intron                  | 3.07E-06 | 0.007992                    |
| NOTCH1            | ENSG00000101384     | 56   | Notch Pathway      | 9                 | Dependence        | 0                        | Intron                  | 3.29E-06 | 0.012443                    |
| NOTCH2            | ENSG00000134250     | 64   | Notch Pathway      | 1                 | Dependence        | 0                        | Intron                  | 4.19E-06 | 0.013994                    |
| NOTCH3            | ENSG00000074181     | 86   | Notch Pathway      | 19                | Dependence        | 3797                     | Downstream              | 7.65E-06 | 0.018677                    |
| NOTCH2NLC         | ENSG00000286219     | 165  | Notch Pathway      | 1                 | Withdrawal        | 0                        | Intron                  | 2.85E-06 | 0.012636                    |
| RBPJ              | ENSG00000168214     | 107  | Notch Pathway      | 4                 | Dependence        | 0                        | Intron                  | 1.17E-05 | 0.022698                    |
| RBPJP2            | ENSG00000274181     | 121  | Notch Pathway      | 9                 | Dependence        | 19867                    | Upstream                | 1.50E-05 | 0.025700                    |
| RBPJ              | ENSG00000168214     | 125  | Notch Pathway      | 4                 | Withdrawal        | 0                        | Intron                  | 1.34E-08 | 0.000859                    |
|                   |                     |      |                    |                   |                   |                          |                         |          |                             |
|                   |                     |      |                    |                   |                   |                          |                         |          |                             |
| Nearest Gene Name | Nearest Gene Number | Page | Annotation         | Chromosome Number | Dependency Status | Function                 | Number Genes Identified | P-Value  |                             |
| PSENEN            | ENSG00000205155     | 325  | Skin Lesion        | 19                | Withdrawal        | Notch Processing         | 115                     | 1.65E-06 |                             |
| PSENEN            | ENSG00000205155     | 325  | Skin cancer        | 19                | Withdrawal        | Notch Processing         | 113                     | 4.79E-06 |                             |
| PSENEN            | ENSG00000205155     | 326  | Cutaneous melanoma | 19                | Withdrawal        | Notch Processing         | 110                     | 7.71E-06 |                             |
| PSENEN            | ENSG00000205155     | 327  | Solid Organ        | 19                | Withdrawal        | Notch Processing         | 150                     | 9.16E-06 |                             |
| PSENEN            | ENSG00000205155     | 329  | Cancer             | 19                | Withdrawal        | Notch Processing         | 151                     | 4.32E-05 |                             |
| PSENEN            | ENSG00000205155     | 329  | Melanoma           | 19                | Withdrawal        | Notch Processing         | 115                     | 6.21E-05 |                             |
| PSENEN            | ENSG00000205155     | 335  | Solid Organ        | 19                | Withdrawal        | Notch Processing         | 149                     | 1.63E-04 |                             |
| PSENEN            | ENSG00000205155     | 353  | Protein            | 19                | Withdrawal        | Notch Processing         | 4                       | 4.69E-03 |                             |
| PSENEN            | ENSG00000205155     | 356  | Organismal death   | 19                | Withdrawal        | Notch Processing         | 39                      | 6.70E-03 |                             |



Supplementary Table S22.: Cannabis Impacts on VEGF Signalling, Schrott EWAS Data.

| Nearest Gene Name | Chromosome Number | Nearest Gene Number   | Dependency Status       | Functional Annotation                | Page                        | Distance from Nearest Gene | Relative Position | P-Value  | Bonferroni Adjusted P-Value |
|-------------------|-------------------|-----------------------|-------------------------|--------------------------------------|-----------------------------|----------------------------|-------------------|----------|-----------------------------|
| VEGFA             | 6                 | ENSG00000112715       | Dependence              | Vascular Endothelial Growth Factor A | 60                          | 0                          | Exon              | 3.68E-06 | 0.013108                    |
| EFNB2             | 8                 | ENSG00000125266       | Withdrawal              | Ephrin B2                            | 179                         | 0                          | Intron            | 4.86E-06 | 0.016245                    |
|                   |                   |                       |                         |                                      |                             |                            |                   |          |                             |
|                   |                   |                       |                         |                                      |                             |                            |                   |          |                             |
| KEGG Pathways     |                   |                       |                         |                                      |                             |                            |                   |          |                             |
|                   |                   |                       |                         |                                      |                             |                            |                   |          |                             |
| Nearest Gene Name | Page              | Functional Annotation | Number Genes Identified | P-Value                              | Bonferroni Adjusted P-Value |                            |                   |          |                             |
| VEFGA             | 236               | Rap1 signalling       | 41                      | 0.000353                             | 0.092548                    |                            |                   |          |                             |
| VEFGA             | 236               | Focal adhesion        | 39                      | 0.000934                             | 0.226633                    |                            |                   |          |                             |
| VEFGA             | 237               | Ras signalling        | 38                      | 0.008745                             | 0.910668                    |                            |                   |          |                             |
| VEFGA             | 238               | Cancer pathways       | 54                      | 0.0677703                            | 1.000000                    |                            |                   |          |                             |

SupplementaryTable S23.: Comparative Lists of Significantly Cannabinoid-Associated Congenital Anomalies in Europe and USA

| No. | Europe                                             |                   |             |           | USA                                     |                       |             |          |
|-----|----------------------------------------------------|-------------------|-------------|-----------|-----------------------------------------|-----------------------|-------------|----------|
|     | Congenital Anomaly                                 | Term              | Model       | P_Value   | Congenital Anomaly                      | Term                  | Model       | P_Value  |
| 1   | Abdominal Wall Defx                                | pm.Resin.Daily    | Categorical | 3.01E-120 |                                         |                       |             |          |
| 2   | All Anomalies                                      | Daily_Use         | Categorical | <2.2E-320 |                                         |                       |             |          |
| 3   | Amniotic band                                      | pm.Resin.Daily    | Categorical | 1.09E-47  |                                         |                       |             |          |
| 4   | Anencephalus and similar                           | Resin_THC         | Categorical | 1.53E-212 |                                         |                       |             |          |
| 5   | Annular Pancreas                                   | Daily_Use         | Categorical | 1.52E-13  |                                         |                       |             |          |
| 6   | Anophthalmos                                       | Daily_Use         | Categorical | 1.06E-06  |                                         |                       |             |          |
| 7   | Ano-rectal atresia and stenosis                    | pm.Resin.Daily    | Categorical | 4.03E-39  |                                         |                       |             |          |
| 8   | Anotia                                             | Herb_THC          | Categorical | 4.63E-13  | Anotia/microtia                         | LM_Cannabis           | Continuous  | 7.57E-04 |
| 9   | Aortic atresia/interrupted aortic arch             | LM.Cann_Resin_THC | Categorical | 5.71E-25  | Interrupted aortic arch                 | LM_Cannabis           | Continuous  | 3.40E-06 |
| 10  | Aortic Valve stenosis / atresia                    | Herb_THC          | Categorical | 7.14E-13  | Aortic valve stenosis                   | LM_Cannabis           | Continuous  | 0.0019   |
| 11  | Arhinencephaly/holoprosencephaly                   | LM_Herb.Daily     | Continuous  | 0.0052    |                                         |                       |             |          |
| 12  | Arterial Truncus                                   | pm.Herb.Daily     | Categorical | 9.92E-07  |                                         |                       |             |          |
| 13  | Atrial septal defect (ASD)                         | Herb_THC          | Categorical | <2.2E-320 | Atrial septal defect (ASD)              | LM_Cannabis           | Continuous  | 0.0378   |
| 14  | Atrioventricular septal defect (AVSD)              | pm.Resin.Daily    | Categorical | 1.65E-101 | Atrioventricular septal defect (AVSD)   | LM_Cannabis           | Categorical | 0.0470   |
| 15  | Bilateral renal agenesis including Potter syndrome | Herb_THC          | Categorical | 1.08E-47  | Renal agenesis/hypoplasia               | LM_Cannabis           | Continuous  | 7.34E-04 |
| 16  | Bile duct atresia                                  | Daily_Use         | Categorical | 1.00E-40  | Biliary atresia                         | Cannabidiol_Estimates | Continuous  | 2.43E-04 |
| 17  | Bladder Extrophy / Epispadias                      | pm.Resin.Daily    | Categorical | 1.56E-18  | Bladder extrophy                        | LM_Cannabis           | Continuous  | 0.0170   |
| 18  | Choanal Atresia                                    | Herb_THC          | Categorical | 7.34E-94  | Choanal atresia                         | Δ9THC_Estimates       | Continuous  | 0.0033   |
| 19  | Chromosomal                                        | Daily_Use         | Categorical | <2.2E-320 |                                         |                       |             |          |
| 20  | Cleft lip with or without palate                   | Herb_THC          | Categorical | 1.80E-101 | Cleft lip with and without cleft palate | Cannabidiol_Estimates | Categorical | 0.0159   |
| 21  | Cleft palate                                       | Herb_THC          | Categorical | 1.79E-34  | Cleft palate alone                      | LM_Cannabis           | Continuous  | 0.0014   |
| 22  |                                                    |                   |             |           | Cloacal extrophy                        | LM_Cannabis           | Categorical | 2.13E-86 |
| 23  | Club foot - talipes equinovarus                    | Daily_Use         | Categorical | 4.23E-292 | Clubfoot                                | LM_Cannabis           | Continuous  | 3.16E-05 |
| 24  | Coarctation Aorta                                  | Daily_Use         | Categorical | 5.78E-33  | Coarctation of the aorta                | LM_Cannabis           | Categorical | 9.74E-45 |
| 25  | Congenital cataract                                | Daily_Use         | Categorical | 4.88E-66  | Congenital cataract                     | LM_Cannabis           | Continuous  | 0.0479   |
| 26  | Congenital glaucoma                                | Daily_Use         | Categorical | 1.52E-43  |                                         |                       |             |          |
| 27  | Congenital Heart                                   | pm.Herb.Daily     | Categorical | <2.2E-320 |                                         |                       |             |          |
| 28  | Conjoined twins                                    | Daily_Use         | Categorical | 8.62E-14  |                                         |                       |             |          |
| 29  | Craniosynostosis                                   | Daily_Use         | Categorical | 5.72E-155 |                                         |                       |             |          |
| 30  | Cystic adenomatous malformation of lung            | Daily_Use         | Categorical | 4.05E-80  |                                         |                       |             |          |

|    |                                                |                  |             |           |                                              |                       |             |          |
|----|------------------------------------------------|------------------|-------------|-----------|----------------------------------------------|-----------------------|-------------|----------|
| 31 | Diaphragmatic Hernia                           | Daily_Use        | Categorical | 8.77E-57  | Diaphragmatic hernia                         | LM_Cannabis           | Categorical | 2.11E-08 |
| 32 | Digestive system                               | pm.Herb.Daily    | Categorical | 1.61E-264 |                                              |                       |             |          |
| 33 | Double outlet right ventricle                  | pm.Herb.Daily    | Categorical | 1.28E-46  | Double outlet right ventricle                | LM_Cannabis           | Categorical | 7.31E-04 |
| 34 | Down Syndrome                                  | Daily_Use        | Categorical | <2.2E-320 | Trisomy 21 (Down syndrome)                   | LM_Cannabis           | Categorical | 4.02E-26 |
| 35 | Duodenal stenosis / atresia                    | Herb_THC         | Categorical | 1.50E-10  |                                              |                       |             |          |
| 36 | Ear, face and neck                             | Daily_Use        | Categorical | 3.38E-44  |                                              |                       |             |          |
| 37 | Ebstein's Anomaly                              | pm.Resin.Daily   | Categorical | 3.23E-17  |                                              |                       |             |          |
| 38 | Edward syndrome / Trisomy 18                   | Daily_Use        | Categorical | <2.2E-320 | Edward syndrome / Trisomy 18                 | LM_Cannabis           | Categorical | 1.06E-61 |
| 39 | Encephalocele                                  | pm.Resin.Daily   | Categorical | 4.76E-21  | Encephalocele                                | LM_Cannabis           | Continuous  | 0.0013   |
| 40 |                                                |                  |             |           | Epispadias                                   | LM_Cannabis           | Continuous  | 0.0111   |
| 41 | Eye                                            | Daily_Use        | Categorical | 2.27E-175 |                                              |                       |             |          |
| 42 | Fetal alcohol syndrome                         | pm.Resin.Daily   | Categorical | 5.88E-57  |                                              |                       |             |          |
| 43 | Gastroschisis                                  | Herb_THC         | Categorical | 6.55E-39  |                                              |                       |             |          |
| 44 | Genetic syndromes + microdeletions             | pm.Herb.Daily    | Categorical | 1.38E-228 | Deletion 22q11.2                             | LM_Cannabis           | Continuous  | 0.0024   |
| 45 | Genital                                        | pm.Herb.Daily    | Categorical | 2.55E-243 |                                              |                       |             |          |
| 46 | Hip dislocation and/or dysplasia               | Daily_Use        | Categorical | 0.00E+00  | Congenital hip dislocation                   | LM_Cannabis           | Categorical | 7.27E-70 |
| 47 | Hirschsprung's disease                         | Daily_Use        | Categorical | 2.54E-88  | Hirschsprung disease (congenital megacolon)  | LM_Cannabis           | Categorical | 6.69E-06 |
| 48 | Holoprosencephaly / Arhinencephaly             | LM_Cannabis      | Categorical | 1.22E-72  | Holoprosencephaly                            | LM_Cannabis           | Categorical | 2.90E-12 |
| 49 | Hydrocephalus                                  | pm.Herb.Daily    | Categorical | 1.76E-110 |                                              |                       |             |          |
| 50 | Hydronephrosis                                 | Herb_THC         | Categorical | 0.00E+00  |                                              |                       |             |          |
| 51 | Hypoplastic Left Heart                         | Daily_Use        | Categorical | 3.37E-61  | Hypoplastic left heart syndrome              | LM_Cannabis           | Continuous  | 0.0047   |
| 52 | Hypoplastic right heart                        | Resin_THC        | Categorical | 2.85E-59  |                                              |                       |             |          |
| 53 | Hypospadias                                    | pm.Herb.Daily    | Categorical | 2.92E-177 | Hypospadias                                  | LM_Cannabis           | Continuous  | 1.16E-05 |
| 54 | Klinefelter syndrome                           | Daily_Use        | Categorical | 1.75E-41  |                                              |                       |             |          |
| 55 |                                                |                  |             |           | Large intestinal and rectal atresia/stenosis | Cannabidiol_Estimates | Continuous  | 0.0040   |
| 56 | Lateral anomalies                              | LM.Cann_Herb_THC | Categorical | 2.36E-48  |                                              |                       |             |          |
| 57 | Limb anomalies                                 | pm.Herb.Daily    | Categorical | <2.2E-320 |                                              |                       |             |          |
| 58 | Limb reductions                                | Daily_Use        | Categorical | 8.20E-65  | Limb deficiencies (reduction defects)        | LM_Cannabis           | Continuous  | 0.0134   |
| 59 |                                                |                  |             |           | Lower limb Reduction deformity               | LM_Cannabis           | Continuous  | 0.0420   |
| 60 | Maternal infections resulting in malformations | Daily_Use        | Categorical | 4.15E-87  |                                              |                       |             |          |
| 61 | Microphthalmos / Anophthalmos                  | Daily_Use        | Categorical | 1.25E-55  | Microphthalmos / Anophthalmos                | Δ9THC_Estimates       | Continuous  | 0.0045   |
| 62 | Mitral valve anomalies                         | pm.Herb.Daily    | Categorical | 8.99E-58  |                                              |                       |             |          |
| 63 | Multicystic renal dysplasia                    | pm.Resin.Daily   | Categorical | 6.70E-251 |                                              |                       |             |          |
| 64 | Nervous system                                 | pm.Herb.Daily    | Categorical | <2.2E-320 |                                              |                       |             |          |
| 65 | Neural Tube Defects                            | Resin_THC        | Categorical | 9.97E-269 |                                              |                       |             |          |

|    |                                              |                |             |           |                                               |                       |             |          |
|----|----------------------------------------------|----------------|-------------|-----------|-----------------------------------------------|-----------------------|-------------|----------|
| 66 |                                              |                |             |           | Obstructive genitourinary defect              | Cannabidiol_Estimates | Categorical | 2.22E-15 |
| 67 | Oesophageal stenosis / atresia               | Daily_Use      | Categorical | 3.49E-44  | Oesophageal atresia/tracheoesophageal fistula | LM_Cannabis           | Continuous  | 4.83E-06 |
| 68 | Omphalocele                                  | pm.Resin.Daily | Categorical | 4.94E-131 | Omphalocele                                   | LM_Cannabis           | Continuous  | 0.0025   |
| 69 | Oro-facial clefts                            | Herb_THC       | Categorical | 3.99E-133 |                                               |                       |             |          |
| 70 | Patau syndrome/trisomy 13                    | Daily_Use      | Categorical | 1.08E-144 | Patau syndrome/trisomy 13                     | LM_Cannabis           | Continuous  | 2.08E-07 |
| 71 | PDA as only CHD in term infants (>=37 weeks) | pm.Herb.Daily  | Categorical | 2.14E-20  |                                               |                       |             |          |
| 72 | Polydactyly                                  | pm.Resin.Daily | Categorical | 1.46E-292 |                                               |                       |             |          |
| 73 | Posterior urethral valve and/or prune belly  | pm.Resin.Daily | Categorical | 1.28E-42  | Congenital posterior urethral valves          | LM_Cannabis           | Continuous  | 1.18E-04 |
| 74 | Pulmonary valve atresia                      | Daily_Use      | Categorical | 1.42E-27  | Pulmonary valve atresia                       | Cannabidiol_Estimates | Categorical | 1.02E-05 |
| 75 | Pulmonary valve stenosis                     | Daily_Use      | Categorical | 2.09E-95  |                                               |                       |             |          |
| 76 | Respiratory                                  | pm.Herb.Daily  | Categorical | 2.57E-203 |                                               |                       |             |          |
| 77 | Severe CHD                                   | Herb_THC       | Categorical | 1.81E-317 |                                               |                       |             |          |
| 78 | Severe microcephaly                          | pm.Herb.Daily  | Categorical | 3.17E-148 |                                               |                       |             |          |
| 79 | Single ventricle                             | Daily_Use      | Categorical | 1.03E-25  | Single ventricle                              | LM_Cannabis           | Categorical | 0.0060   |
| 80 | Situs inversus                               | Daily_Use      | Categorical | 1.42E-44  |                                               |                       |             |          |
| 81 | Skeletal dysplasias                          | Daily_Use      | Categorical | 5.12E-74  |                                               |                       |             |          |
| 82 | Small Intestine stenosis / atresia           | pm.Herb.Daily  | Categorical | 8.23E-31  | Small intestinal atresia/stenosis             | Cannabidiol_Estimates | Continuous  | 3.39E-06 |
| 83 | Spina Bifida                                 | Resin_THC      | Categorical | 3.93E-84  | Spina bifida without anencephalus             | Δ9THC_Estimates       | Continuous  | 0.0008   |
| 84 | Syndactyly                                   | pm.Resin.Daily | Categorical | 3.47E-16  |                                               |                       |             |          |
| 85 | Teratogenic syndromes with malformations     | Daily_Use      | Categorical | 1.42E-139 |                                               |                       |             |          |
| 86 | Tetralogy of Fallot                          | Daily_Use      | Categorical | 3.12E-47  | Tetralogy of Fallot                           | LM_Cannabis           | Continuous  | 0.0168   |
| 87 | Total Anomalous Pulmonary Venous Return      | Herb_THC       | Categorical | 4.07E-09  | Total anomalous pulmonary venous connection   | LM_Cannabis           | Continuous  | 0.0299   |
| 88 | Transposition of great vessels               | Resin_THC      | Categorical | 9.96E-33  | Transposition of great arteries               | Cannabidiol_Estimates | Continuous  | 0.0479   |
| 89 | Turner syndrome                              | Daily_Use      | Categorical | 1.10E-146 | Turner syndrome                               | LM_Cannabis           | Categorical | 7.69E-49 |
| 90 | Tricuspid valve stenosis / atresia           | Daily_Use      | Categorical | 6.86E-24  |                                               |                       |             |          |
| 91 | Urinary                                      | pm.Resin.Daily | Categorical | <2.2E-320 |                                               |                       |             |          |
| 92 | Valproate syndrome                           | Daily_Use      | Categorical | 1.57E-07  |                                               |                       |             |          |
| 93 | Vascular disruption anomalies                | Herb_THC       | Categorical | 3.46E-101 |                                               |                       |             |          |
| 94 | VATER/VACTERL                                | pm.Herb.Daily  | Categorical | 2.43E-36  |                                               |                       |             |          |
| 95 | Ventricular septal defect (VSD)              | pm.Resin.Daily | Categorical | <2.2E-320 | Ventricular septal defect                     | LM_Cannabis           | Continuous  | 0.0021   |

Supplementary Table S24.: Epigenomic Hits for Central Nervous System Congenital Anomalies, Schrott EWAS Database

| Target       | Annotation                                 | Status     | Page | Number of Genes Annotated | P-Value  |
|--------------|--------------------------------------------|------------|------|---------------------------|----------|
|              |                                            |            |      |                           |          |
| Brain        | Glioma                                     | Dependence | 284  | 227                       | 1.39E-07 |
|              | Brain lesion                               | Dependence | 285  | 230                       | 1.63E-07 |
|              | Brain tumour                               | Dependence | 286  | 228                       | 2.29E-07 |
|              | Brain size                                 | Dependence | 351  | 6                         | 0.003630 |
|              | Brain formation                            | Dependence | 356  | 12                        | 0.006790 |
|              | Morphology of CNS                          | Dependence | 300  | 47                        | 0.000037 |
|              | Forebrain patterning                       | Withdrawal | 333  | 3                         | 0.000116 |
| Neurological | Glioma                                     | Dependence | 281  | 235                       | 5.33E-08 |
|              | Glioma                                     | Dependence | 284  | 227                       | 1.39E-07 |
|              | Brain lesion                               | Dependence | 285  | 230                       | 1.63E-07 |
|              | Morphology enteric ganglia                 | Dependence | 308  | 3                         | 2.74E-04 |
|              | Morphology of spiral ganglia               | Dependence | 312  | 4                         | 0.000615 |
|              | Morphology of spiral ganglia               | Withdrawal | 342  | 2                         | 0.000720 |
|              | Sciatic nerve myelination                  | Dependence | 314  | 3                         | 0.000777 |
|              | Hair cell morphology                       | Dependence | 316  | 5                         | 0.001190 |
|              | Stratum pyramidale morphology              | Dependence | 316  | 3                         | 0.001310 |
| Synapse      | Glutamnergic synapse                       | Dependence | 236  | 29                        | 3.11E-04 |
|              | Neuronal synapse                           | Dependence | 236  | 53                        | 7.10E-05 |
|              | Dopaminergic Synapse                       | Dependence | 236  | 29                        | 3.12E-05 |
|              | Dopaminergic Synapse                       | Dependence | 236  | 27                        | 0.007806 |
|              | Retrograde endocannabinoid signalling      | Dependence | 236  | 24                        | 0.000511 |
|              | Long term depression                       | Dependence | 236  | 17                        | 0.000582 |
|              | Long term potentiation                     | Dependence | 236  | 17                        | 0.001768 |
|              | Morphine addiction                         | Dependence | 236  | 20                        | 0.004349 |
|              | Serotonergic Synapse                       | Dependence | 237  | 21                        | 0.018174 |
|              | Cholinergic Synapse                        | Dependence | 237  | 19                        | 0.060483 |
|              | GABAergic synapse                          | Dependence | 238  | 15                        | 0.081486 |
|              | Synaptic transmission                      | Dependence | 308  | 20                        | 0.000291 |
|              | Synaptic Organization                      | Dependence | 310  | 8                         | 0.000338 |
|              | Inhibitory post-synaptic potential         | Dependence | 321  | 5                         | 0.001890 |
|              | Maturation of synapse                      | Dependence | 323  | 4                         | 0.002480 |
|              | Synaptic transmission                      | Withdrawal | 334  | 12                        | 0.000143 |
|              | Long term potentiation excitatory synapses | Withdrawal | 337  | 2                         | 0.000291 |
|              | Development of synapses                    | Withdrawal | 344  | 8                         | 0.001210 |
|              | Excitatory post-synaptic potential         | Withdrawal | 344  | 6                         | 0.001250 |
|              | Synaptic transmission                      | Withdrawal | 346  | 4                         | 0.002020 |
|              | Density of synapse                         | Withdrawal | 352  | 3                         | 0.004640 |
|              | Binding presynaptic membrane               | Withdrawal | 357  | 1                         | 0.007010 |

|          |                                         |            |     |     |          |
|----------|-----------------------------------------|------------|-----|-----|----------|
| Cerebrum | Cerebral disorder                       | Dependence | 317 | 106 | 0.001350 |
|          | Development of Cerebral cortex          | Withdrawal | 351 | 6   | 0.004070 |
|          | Head development                        | Dependence | 304 | 47  | 0.000120 |
|          | Head size                               | Withdrawal | 342 | 8   | 0.000741 |
|          | Viability of cerebral cortex cells      | Withdrawal | 349 | 4   | 0.002780 |
|          | Movement of cerebral cortex cells       | Withdrawal | 344 | 4   | 0.001200 |
| Neurons  | Abnormal development of sensory neurons | Dependence | 322 | 7   | 0.002290 |
|          | Neurite growth                          | Dependence | 306 | 26  | 0.000155 |
|          | Abnormal neuronal morphology            | Dependence | 306 | 26  | 0.000182 |
|          | Neuronal growth                         | Dependence | 295 | 25  | 0.000014 |
|          | Proliferation of neurons                | Dependence | 296 | 35  | 0.000194 |
|          | Neuronogenesis                          | Dependence | 299 | 43  | 0.000026 |
|          | Neuronal Morphology                     | Dependence | 296 | 35  | 9.27E-06 |
|          | Neuronal development                    | Dependence | 299 | 43  | 0.000026 |
|          | Neuronal outgrowth                      | Dependence | 298 | 25  | 0.000014 |
|          | Synapse growth                          | Dependence | 308 | 27  | 0.000263 |
|          | Axonogenesis                            | Dependence | 318 | 14  | 0.001640 |
|          | Axon regeneration                       | Dependence | 322 | 7   | 0.002170 |
|          | Movement of brain cells                 | Dependence | 319 | 8   | 0.001740 |
|          | Movement of brain cells                 | Withdrawal | 347 | 5   | 0.002040 |
|          | Neuronogenesis                          | Withdrawal | 349 | 2   | 0.003080 |
|          | Apoptosis cortical neurons              | Withdrawal | 356 | 4   | 0.006650 |
|          | Developmental synapse formation         | Dependence | 308 | 15  | 0.000291 |
| Eye      | Eye formation                           | Dependence | 302 | 25  | 0.000079 |
|          | Eye formation                           | Withdrawal | 328 | 15  | 0.000028 |
|          | Eye morphology                          | Dependence | 308 | 18  | 0.000243 |
|          | Eye morphology                          | Withdrawal | 334 | 11  | 0.000123 |
|          | Eye morphology - Anterior Segment       | Dependence | 318 | 7   | 0.001630 |
|          | Eye morphology                          | Withdrawal | 340 | 9   | 0.000554 |
|          | Eye morphogenesis                       | Dependence | 338 | 5   | 0.000390 |
|          | Photoreceptor abnormalities             | Withdrawal | 340 | 5   | 0.000611 |
|          | Morphogenesis camera type eye           | Withdrawal | 341 | 4   | 0.000689 |
|          | Morphology of eye cells                 | Withdrawal | 342 | 6   | 0.000856 |
|          | Retinal Photoresponse                   | Withdrawal | 354 | 2   | 0.005500 |
|          | Abnormal Ocular Posterior Segment       | Withdrawal | 342 | 2   | 0.000720 |

Supplementary Table S25.: Epigenomic Hits for Cardiovascular System Congenital Anomalies, Schrott EWAS Database

| Target                  | Annotation                                 | Status     | Page | Number of Genes Annotated | P-Value  |
|-------------------------|--------------------------------------------|------------|------|---------------------------|----------|
|                         |                                            |            |      |                           |          |
| Cardiovascular          | Morphology of CVS                          | Dependence | 321  | 39                        | 0.001920 |
|                         | Abnormal CVS                               | Dependence | 324  | 35                        | 0.002740 |
| Heart                   | Quantity of cardiomyocytes                 | Dependence | 321  | 4                         | 0.001960 |
|                         | Hypoplasia of heart chamber                | Dependence | 299  | 7                         | 0.000021 |
|                         | Hypoplasia of the heart                    | Dependence | 288  | 10                        | 8.83E-08 |
|                         | Hypoplasia of the heart                    | Dependence | 299  | 7                         | 0.000021 |
|                         | Cardiogenesis                              | Dependence | 318  | 26                        | 0.001640 |
| Atria                   | Atrial Morphogenesis                       | Dependence | 314  | 4                         | 0.000855 |
|                         | Morphogenesis of Atrial Septum             | Dependence | 318  | 3                         | 0.001650 |
|                         | Atrial hypoplasia                          | Dependence | 319  | 2                         | 0.001770 |
|                         | Abnormal atrial morphology                 | Dependence | 322  | 6                         | 0.002100 |
| Atrioventricular valves | Abnormalities of atrioventricular cushions | Dependence | 296  | 6                         | 9.04E-06 |
|                         | Lack of atrioventricular canal cushion     | Dependence | 300  | 4                         | 0.000040 |
|                         | Morphogenesis of AV valve                  | Dependence | 321  | 3                         | 0.002040 |
| Ventricle               | Formation of ventricular septum            | Dependence | 315  | 7                         | 0.001060 |
|                         | Ventricular septal defects, Type 3         | Dependence | 301  | 3                         | 0.000051 |
|                         | Hypoplasia of ventricle                    | Dependence | 306  | 6                         | 0.000157 |
|                         | Hypoplasia of trabeculae carnae            | Dependence | 321  | 4                         | 0.001960 |
|                         | Ventricular septum formation               | Dependence | 315  | 7                         | 0.001060 |
| Vessels                 | Angiogenesis                               | Dependence | 289  | 54                        | 1.73E-06 |
|                         | CVS Development                            | Dependence | 294  | 56                        | 7.32E-06 |
|                         | Vasculogenesis                             | Dependence | 302  | 42                        | 6.65E-05 |
|                         | Sprouting angiogenesis                     | Dependence | 324  | 7                         | 0.002690 |
|                         | Vascular endothelial cell movement         | Dependence | 316  | 13                        | 0.001210 |
|                         | Endothelial cell migration                 | Dependence | 317  | 19                        | 0.001450 |
|                         | Vascular Endothelial cell migration        | Dependence | 317  | 12                        | 0.001530 |
|                         | Early onset hypertension                   | Dependence | 357  | 1                         | 0.007010 |
|                         | Blood vessel breakdown                     | Dependence | 357  | 1                         | 0.007010 |
|                         | Pulmonary vein angiogenesis                | Dependence | 357  | 1                         | 0.007010 |

Supplementary Table S26.: Epigenomic Hits for Face Congenital Anomalies,  
Schrott EWAS Database

| Target  | Annotation                        | Status     | Page Number | Number of Genes Annotated | P-Value  |
|---------|-----------------------------------|------------|-------------|---------------------------|----------|
|         |                                   |            |             |                           |          |
| Head    | Head development                  | Dependence | 304         | 47                        | 0.000120 |
| Sensory | Sensory organs                    | Dependence | 306         | 29                        | 0.000164 |
| Palate  | Palate                            | Withdrawal | 358         | 1                         | 0.007010 |
| Nose    | Nose                              | Withdrawal | 343         | 3                         | 0.001080 |
| Eye     | Eye morphology - Anterior Segment | Dependence | 318         | 7                         | 0.001630 |
|         | Morphogenesis camera type eye     | Withdrawal | 341         | 4                         | 0.000689 |
|         | Morphology of eye cells           | Withdrawal | 342         | 6                         | 0.000856 |
|         | Cornea                            | Dependence | 323         | 3                         | 0.002470 |
|         | Iris Abnormalities                | Withdrawal | 354         | 2                         | 0.005500 |
|         | Lens                              | Withdrawal | 354         | 3                         | 0.005510 |
|         | Lens                              | Withdrawal | 333         | 4                         | 0.000092 |
| Ear     | Ear                               | Withdrawal | 342         | 7                         | 0.000804 |
|         | Inner ear                         | Dependence | 323         | 9                         | 0.002470 |
|         | Inner ear                         | Dependence | 316         | 8                         | 0.001650 |
|         | Abnormal Morphology of Cochlea    | Dependence | 324         | 6                         | 0.002720 |
|         | Cochlea                           | Withdrawal | 353         | 4                         | 0.004870 |
|         | Cochlea Duct                      | Dependence | 324         | 6                         | 0.003620 |
|         | Spiral Ganglion                   | Withdrawal | 312         | 4                         | 0.000720 |
|         | Spiral Ganglion - small           | Dependence | 342         | 2                         | 0.000720 |
|         | Vestibular Ganglion               | Withdrawal | 318         | 3                         | 0.000165 |
|         | Hair cell morphology disruption   | Dependence | 316         | 5                         | 0.001650 |
|         | Vestibulocochlear nerve           | Withdrawal | 344         | 3                         | 0.001200 |



Supplementary Table S27.: Epigenomic Hits for General Congenital Anomalies,  
Schrott EWAS Database

| Target          | Annotation                                | Status     | Page Number | Number of Genes | P-Value  |
|-----------------|-------------------------------------------|------------|-------------|-----------------|----------|
| Embryo          | Cell growth                               | Dependence | 295         | 27              | 8.20E-06 |
|                 | Cell growth                               | Dependence | 296         | 83              | 0.000011 |
|                 | Connective tissue growth                  | Dependence | 297         | 37              | 0.000012 |
|                 | Epithelial growth                         | Dependence | 300         | 30              | 0.000036 |
|                 | Embryonic growth                          | Dependence | 305         | 27              | 0.001420 |
|                 | Organismal growth                         | Dependence | 310         | 39              | 0.000361 |
|                 | Morphogenesis of embryo                   | Dependence | 310         | 15              | 0.003680 |
|                 | Morphogenesis of embryo                   | Dependence | 300         | 12              | 0.003580 |
|                 | Differentiation of embryonic cells        | Dependence | 316         | 15              | 0.001240 |
| DNA             | DNA transcription                         | Dependence | 298         | 89              | 0.000015 |
|                 | RNA translation                           | Dependence | 312         | 71              | 0.000540 |
|                 | DNA transcription                         | Dependence | 314         | 60              | 0.000765 |
|                 | Activation endogenous DNA promoter        | Dependence | 317         | 49              | 0.001360 |
|                 | Inhibition endogenous DNA promoter        | Withdrawal | 338         | 26              | 0.000358 |
|                 | Activation endogenous DNA promoter        | Withdrawal | 357         | 1               | 0.007010 |
|                 | DNA replication, recombination and repair | Dependence | 317         | 12              | 0.001530 |
|                 | DNA binding                               | Dependence | 323         | 24              | 0.002360 |
|                 | DNA synthesis and repair                  | Dependence | 323         | 20              | 0.002590 |
|                 | GTP Hydrolysis                            | Withdrawal | 344         | 4               | 0.001130 |
|                 | Chromosomal assembly                      | Withdrawal | 358         | 1               | 0.007010 |
|                 | Thymidine catabolism                      | Withdrawal | 344         | 1               | 0.007010 |
|                 | Chromosomal synapsis                      | Dependence | 298         | 7               | 0.000016 |
|                 | Chromosomal homologous pairing            | Dependence | 302         | 4               | 0.000079 |
|                 | Chromosomal synapsis                      | Dependence | 306         | 5               | 0.000182 |
|                 | DNA recombination                         | Dependence | 317         | 12              | 0.001530 |
|                 | DNA synthesis                             | Dependence | 323         | 20              | 0.002590 |
| Mitochondria    | Mitochondria                              | Withdrawal | 357         | 1               | 0.007010 |
| Microtubules    | Microtubule dynamics                      | Dependence | 300         | 58              | 0.000033 |
|                 | Microtubules                              | Withdrawal | 352         | 24              | 0.004450 |
| Body trunk      | Body trunk                                | Dependence | 317         | 50              | 0.001450 |
| Body Axis       | Body Axis                                 | Dependence | 302         | 1               | 0.000193 |
| Ovarian reserve | Diminished ovarian reserve                | Withdrawal | 349         | 2               | 0.003080 |
| Breast          | Breast cell morphogenesis                 | Dependence | 312         | 3               | 0.000573 |
|                 | Formation mammary gland                   | Withdrawal | 347         | 7               | 0.002060 |
|                 | Differentiation of mammary cells          | Withdrawal | 348         | 2               | 0.002580 |
| Granulocytes    | Growth of colony forming granulocytes     | Dependence | 312         | 3               | 0.000573 |
| Myogenesis      | Germ cell tumour                          | Dependence | 320         | 2               | 0.001770 |
|                 | Carcinoma cell lines                      | Dependence | 320         | 2               | 0.001770 |
| Vertebra        | Vertebral formation                       | Dependence | 353         | 3               | 0.004920 |

| Category | Subcategory                           | Experiment | Year | Count | P-value  |
|----------|---------------------------------------|------------|------|-------|----------|
| Bone     | Bone marrow cell homing               | Dependence | 318  | 3     | 0.001650 |
|          | Abnormal bone morphology              | Dependence | 319  | 20    | 0.001680 |
|          | Bone marrow derived macrophages       | Dependence | 319  | 2     | 0.001770 |
|          | Development of bone marrow cell lines | Dependence | 323  | 5     | 0.002440 |
|          | Loss bone tissue                      | Dependence | 323  | 3     | 0.002470 |
|          | Movement of Bone marrow cells         | Dependence | 323  | 4     | 0.002480 |
|          | Abnormal bone morphology              | Dependence | 324  | 13    | 0.000140 |
|          | Femoral bone mineral density          | Withdrawal | 326  | 4     | 0.000193 |
|          | Endochondral bone ossification        | Withdrawal | 337  | 4     | 0.000277 |
|          | Abnormal bone morphology              | Withdrawal | 339  | 15    | 0.000431 |
|          | Bone ossification                     | Withdrawal | 343  | 6     | 0.001110 |
|          | Bone mineralization                   | Withdrawal | 349  | 6     | 0.002390 |
|          | Bone marrow cell proliferation        | Withdrawal | 353  | 5     | 0.004660 |
|          | Bone cell line attachment             | Withdrawal | 356  | 1     | 0.007010 |
|          | Bone mineralization of diaphysis      | Withdrawal | 357  | 1     | 0.007010 |
|          | Activation bone cell lines            | Withdrawal | 357  | 1     | 0.007010 |
|          | Bone mineral content trabecular layer | Withdrawal | 357  | 1     | 0.007010 |
|          | Bone marrow cell spreading            | Withdrawal | 357  | 1     | 0.007010 |
|          | Chondrogenesis of chondroprogenitors  | Withdrawal | 357  | 1     | 0.007010 |
|          | Bone mineralization of metaphysis     | Withdrawal | 357  | 1     | 0.007010 |
|          | Bone mineralization of diaphysis      | Withdrawal | 358  | 1     | 0.007010 |

Supplementary Table S28.: Epigenomic Hits for Limb Congenital Anomalies,  
Schrott EWAS Database

| Target | Annotation                   | Status     | Page Number | Number of Genes Annotated | P-Value  |
|--------|------------------------------|------------|-------------|---------------------------|----------|
|        |                              |            |             |                           |          |
| Limb   | Limb morphogenesis in embryo | Withdrawal | 352         | 4                         | 0.004190 |
|        | Limb morphogenesis in embryo | Withdrawal | 354         | 5                         | 0.005470 |
|        | Apoptosis of limb bud cells  | Withdrawal | 356         | 1                         | 0.007010 |
|        | Preaxial polydactyly         | Withdrawal | 333         | 3                         | 0.000092 |
|        | Polysyndactyly               | Withdrawal | 345         | 2                         | 0.001700 |
|        | Polydactyly                  | Withdrawal | 350         | 3                         | 0.003300 |

Supplementary Table S29.: Epigenomic Hits for Gastrointestinal Congenital Anomalies,  
Schrott EWAS Database

| Target           | Annotation                       | Status     | Page Number | Number of Genes Annotated | P-Value  |
|------------------|----------------------------------|------------|-------------|---------------------------|----------|
|                  |                                  |            |             |                           |          |
| Gastrointestinal | Gastrointestinal cancer          | Dependence | 249         | 325                       | 4.60E-16 |
|                  | Gastrointestinal cancer          | Dependence | 250         | 349                       | 7.70E-16 |
|                  | Gastrointestinal tumour          | Dependence | 252         | 252                       | 1.01E-15 |
|                  | Gastrointestinal tumour          | Dependence | 253         | 333                       | 1.02E-15 |
|                  | Gastrointestinal cancer          | Dependence | 253         | 332                       | 1.24E-15 |
|                  | Gastrointestinal tumour          | Dependence | 255         | 352                       | 1.49E-15 |
|                  | Gastrointestinal cancer          | Dependence | 257         | 312                       | 6.45E-15 |
|                  | Large Intestinal cancer          | Dependence | 257         | 306                       | 7.65E-15 |
| Esophagus        | Gastroesophageal cancer          | Dependence | 262         | 169                       | 3.15E-13 |
|                  | Gastroesophageal cancer          | Dependence | 265         | 171                       | 1.53E-12 |
|                  | Esophageal cancer                | Dependence | 320         | 22                        | 0.001880 |
|                  | Esophageal lesion                | Dependence | 324         | 31                        | 0.002750 |
|                  | Esophageal cancer                | Withdrawal | 347         | 15                        | 0.002020 |
|                  | Esophageal lesion                | Withdrawal | 348         | 16                        | 0.002770 |
|                  | Gastroesophageal adenocarcinoma  | Withdrawal | 354         | 38                        | 0.005250 |
| Large Intestine  | Large Intestinal carcinoma       | Dependence | 257         | 306                       | 7.65E-15 |
|                  | Large Intestinal carcinoma       | Dependence | 258         | 304                       | 1.11E-14 |
|                  | Large Intestinal carcinoma       | Dependence | 260         | 314                       | 6.40E-14 |
|                  | Large Intestinal carcinoma       | Dependence | 261         | 313                       | 7.15E-14 |
|                  | Large Intestinal adenocarcinoma  | Withdrawal | 326         | 120                       | 7.45E-06 |
|                  | Large Intestinal neoplasm        | Withdrawal | 331         | 122                       | 0.000068 |
|                  | Large Intestinal carcinoma       | Withdrawal | 333         | 121                       | 0.000108 |
|                  | Enteric ganglia                  | Dependence | 308         | 3                         | 0.000274 |
| Liver            | Hepatobiliary carcinoma          | Dependence | 284         | 176                       | 1.28E-07 |
|                  | Hepatobiliary carcinoma          | Dependence | 286         | 228                       | 2.29E-07 |
| Pancreas         | Pancreatobiliary cancer          | Dependence | 288         | 124                       | 9.10E-07 |
|                  | Pancreatic cancer                | Dependence | 290         | 181                       | 2.64E-06 |
|                  | Pancreatic cancer                | Dependence | 297         | 90                        | 0.000012 |
|                  | Pancreatic tumour                | Dependence | 297         | 95                        | 0.000012 |
|                  | Pancreatic tumour                | Dependence | 298         | 106                       | 0.000013 |
|                  | Pancreatic adenocarcinoma        | Dependence | 300         | 85                        | 0.000033 |
|                  | Pancreatic ductal adenocarcinoma | Dependence | 301         | 82                        | 0.000060 |
|                  | Pancreatic cell line migration   | Dependence | 323         | 6                         | 0.002390 |
|                  | Pancreatic cell line invasion    | Withdrawal | 353         | 3                         | 0.005210 |
|                  | Pancreatic cell line G1 phase    | Withdrawal | 353         | 2                         | 0.006200 |
|                  | Pancreatic cancer                | Withdrawal | 355         | 36                        | 0.006460 |
|                  | Pancreatic cancer                | Withdrawal | 355         | 71                        | 0.005920 |

Supplementary Table S30.: Epigenomic Hits for Chromosomal Congenital Anomalies,  
Schrott EWAS Database

| Target      | Annotation                        | Status     | Page Number | Number of Genes Annotated | P-Value  |
|-------------|-----------------------------------|------------|-------------|---------------------------|----------|
|             |                                   |            |             |                           |          |
| Chromosomes | Homologous pairing of chromosomes | Dependence | 302         | 4                         | 0.000079 |
|             | Assembly of Chromosomes           | Withdrawal | 358         | 1                         | 0.007010 |
|             | Chromosomal synapsis              | Dependence | 298         | 7                         | 0.000016 |
|             | Chromosomal synapsis              | Dependence | 306         | 5                         | 0.000182 |

Supplementary Table S31.: Epigenomic Hits for Uronephrological Congenital Anomalies,  
Schrott EWAS Database

| Target         | Annotation                          | Status     | Page Number | Number of Genes Annotated | P-Value  |
|----------------|-------------------------------------|------------|-------------|---------------------------|----------|
|                |                                     |            |             |                           |          |
| Urinary system | Urinary system morphology           | Dependence | 322         | 17                        | 0.000220 |
|                | Familial anopmalies Urinary tract   | Withdrawal | 352         | 8                         | 0.004400 |
| Kidney         | Renal agenesis                      | Dependence | 311         | 5                         | 0.000429 |
|                | Morphology of renal tubule          | Dependence | 313         | 8                         | 0.000606 |
|                | Morphology of kidney                | Dependence | 322         | 16                        | 0.002160 |
|                | Renal lesion                        | Dependence | 322         | 48                        | 0.002200 |
|                | Abnormal Morphology of renal tubule | Dependence | 323         | 7                         | 0.002550 |
|                | Proximal tubular toxicity           | Withdrawal | 352         | 4                         | 0.004190 |

Supplementary Table S32.: Epigenomic Hits for Body Wall Congenital Anomalies,  
Schrott EWAS Database

| Target | Annotation                           | Status     | Page Number | Number of Genes Annotated | P-Value  |
|--------|--------------------------------------|------------|-------------|---------------------------|----------|
|        |                                      |            |             |                           |          |
| Body   | Body trunk development               | Dependence | 317         | 50                        | 0.001450 |
|        | Body trunk development               | Withdrawal | 340         | 26                        | 0.000555 |
|        | Body axis development                | Dependence | 302         | 50                        | 0.000078 |
|        | Body axis development                | Withdrawal | 336         | 25                        | 0.000193 |
|        | Myogenesis germ cell tumour lines    | Dependence | 320         | 2                         | 0.001770 |
|        | Myogenesis carcinoma tumour lines    | Dependence | 320         | 2                         | 0.001770 |
|        | Development of abdomen               | Dependence | 317         | 28                        | 0.001620 |
| Embryo | Morphogenesis embryonic tissue       | Dependence | 300         | 12                        | 0.000036 |
|        | Embryonic growth                     | Dependence | 305         | 27                        | 0.000142 |
|        | Embryonic morphogenesis              | Dependence | 310         | 15                        | 0.003680 |
|        | Differentiation embryonic cells      | Dependence | 315         | 15                        | 0.001240 |
|        | Differentiation embryonic stem cells | Dependence | 322         | 8                         | 0.002320 |
|        | Embryonic growth                     | Dependence | 324         | 16                        | 0.002810 |
|        | Quantity of embryo                   | Withdrawal | 348         | 6                         | 0.002320 |
|        | Stimulation of embryonic tissue      | Withdrawal | 356         | 2                         | 0.006950 |

Supplementary Table S33.: Summary Teratology Epigenomic Hits for All Congenital Anomalies,  
Schrott EWAS Database

| System         | Target                  | Annotation                                 | Status     | Page | Number of Genes Annotated | P-Value  |
|----------------|-------------------------|--------------------------------------------|------------|------|---------------------------|----------|
|                |                         |                                            |            |      |                           |          |
| Cardiovascular | Cardiovascular          | Morphology of CVS                          | Dependence | 321  | 39                        | 0.001920 |
| Cardiovascular | Cardiovascular          | Morphology of CVS                          | Dependence | 324  | 35                        | 0.002740 |
| Cardiovascular | Cardiovascular          | Quantity of cardiomyocytes                 | Dependence | 321  | 4                         | 0.001960 |
| Cardiovascular | Cardiovascular          | Hypoplasia of heart chamber                | Dependence | 299  | 7                         | 0.000021 |
| Cardiovascular | Heart                   | Hypoplasia of the heart                    | Dependence | 288  | 10                        | 8.83E-08 |
| Cardiovascular | Heart                   | Hypoplasia of the heart                    | Dependence | 299  | 7                         | 0.000021 |
| Cardiovascular | Heart                   | Hypoplasia of the heart ventricle          | Dependence | 306  | 6                         | 0.000157 |
| Cardiovascular | Heart                   | Hypoplasia of trabeculae carnae            | Dependence | 321  | 4                         | 0.001960 |
| Cardiovascular | Heart                   | Cardiogenesis                              | Dependence | 318  | 26                        | 0.001640 |
| Cardiovascular | Atria                   | Atrial Morphogenesis                       | Dependence | 314  | 4                         | 0.000855 |
| Cardiovascular | Atria                   | Morphogenesis of Atrial Septum             | Dependence | 318  | 3                         | 0.001650 |
| Cardiovascular | Atria                   | Atrial hypoplasia                          | Dependence | 319  | 2                         | 0.001770 |
| Cardiovascular | Atria                   | Abnormal atrial morphology                 | Dependence | 322  | 6                         | 0.002100 |
| Cardiovascular | Atrioventricular valves | Abnormalities of atrioventricular cushions | Dependence | 296  | 6                         | 9.04E-06 |
| Cardiovascular | Atrioventricular valves | Lack of atrioventricular canal cushion     | Dependence | 300  | 4                         | 0.000040 |
| Cardiovascular | Atrioventricular valves | Morphogenesis of AV valve                  | Dependence | 321  | 3                         | 0.002040 |
| Cardiovascular | Ventricle               | Formation of ventricular septum            | Dependence | 315  | 7                         | 0.001060 |
| Cardiovascular | Ventricle               | Ventricular septal defects, Type 3         | Dependence | 301  | 3                         | 0.000051 |
| Cardiovascular | Ventricle               | Hypoplasia of ventricle                    | Dependence | 306  | 6                         | 0.000157 |
| Cardiovascular | Ventricle               | Ventricular septum formation               | Dependence | 315  | 7                         | 0.001060 |



|              |              |                                         |            |     |     |          |
|--------------|--------------|-----------------------------------------|------------|-----|-----|----------|
| Neurological | Brain        | Glioma                                  | Dependence | 284 | 227 | 1.39E-07 |
| Neurological | Brain        | Brain lesion                            | Dependence | 285 | 230 | 1.63E-07 |
| Neurological | Brain        | Brain tumour                            | Dependence | 286 | 228 | 2.29E-07 |
| Neurological | Brain        | Brain size                              | Dependence | 351 | 6   | 0.003630 |
| Neurological | Brain        | Brain formation                         | Dependence | 356 | 12  | 0.006790 |
| Neurological | Brain        | Morphology of CNS                       | Dependence | 300 | 47  | 0.000037 |
| Neurological | Brain        | Forebrain patterning                    | Withdrawal | 333 | 3   | 0.000116 |
| Neurological | Neurological | Glioma                                  | Dependence | 281 | 235 | 5.33E-08 |
| Neurological | Neurological | Glioma                                  | Dependence | 284 | 227 | 1.39E-07 |
| Neurological | Neurological | Brain lesion                            | Dependence | 285 | 230 | 1.63E-07 |
| Neurological | Neurological | Morphology enteric ganglia              | Dependence | 308 | 3   | 2.74E-04 |
| Neurological | Neurological | Morphology of spiral ganglia            | Dependence | 312 | 4   | 0.000615 |
| Neurological | Neurological | Morphology of spiral ganglia            | Withdrawal | 342 | 2   | 0.000720 |
| Neurological | Neurological | Sciatic nerve myelination               | Dependence | 314 | 3   | 0.000777 |
| Neurological | Neurological | Hair cell morphology                    | Dependence | 316 | 5   | 0.001190 |
| Neurological | Neurological | Stratum pyramidale morphology           | Dependence | 316 | 3   | 0.001310 |
| Neurological | Cerebrum     | Cerebral disorder                       | Dependence | 317 | 106 | 0.001350 |
| Neurological | Cerebrum     | Development of Cerebral cortex          | Withdrawal | 351 | 6   | 0.004070 |
| Neurological | Cerebrum     | Head development                        | Dependence | 304 | 47  | 0.000120 |
| Neurological | Cerebrum     | Head size                               | Withdrawal | 342 | 8   | 0.000741 |
| Neurological | Cerebrum     | Viability of cerebral cortex cells      | Withdrawal | 349 | 4   | 0.002780 |
| Neurological | Cerebrum     | Movement of cerebral cortex cells       | Withdrawal | 344 | 4   | 0.001200 |
| Neurological | Neurons      | Abnormal development of sensory neurons | Dependence | 322 | 7   | 0.002290 |
| Neurological | Neurons      | Neurite growth                          | Dependence | 306 | 26  | 0.000155 |
| Neurological | Neurons      | Abnormal neuronal morphology            | Dependence | 306 | 26  | 0.000182 |
| Neurological | Neurons      | Neuronal growth                         | Dependence | 295 | 25  | 0.000014 |
| Neurological | Neurons      | Proliferation of neurons                | Dependence | 296 | 35  | 0.000194 |
| Neurological | Neurons      | Neuronogenesis                          | Dependence | 299 | 43  | 0.000026 |
| Neurological | Neurons      | Neuronal Morphology                     | Dependence | 296 | 35  | 9.27E-06 |

|              |         |                                   |            |     |    |          |
|--------------|---------|-----------------------------------|------------|-----|----|----------|
| Neurological | Neurons | Neuronal development              | Dependence | 299 | 43 | 0.000026 |
| Neurological | Neurons | Neuronal outgrowth                | Dependence | 298 | 25 | 0.000014 |
| Neurological | Neurons | Synapse growth                    | Dependence | 308 | 27 | 0.000263 |
| Neurological | Neurons | Axonogenesis                      | Dependence | 318 | 14 | 0.001640 |
| Neurological | Neurons | Axon regeneration                 | Dependence | 322 | 7  | 0.002170 |
| Neurological | Neurons | Movement of brain cells           | Dependence | 319 | 8  | 0.001740 |
| Neurological | Neurons | Movement of brain cells           | Withdrawal | 347 | 5  | 0.002040 |
| Neurological | Neurons | Neuronogenesis                    | Withdrawal | 349 | 2  | 0.003080 |
| Neurological | Neurons | Apoptosis cortical neurons        | Withdrawal | 356 | 4  | 0.006650 |
| Neurological | Neurons | Developmental synapse formation   | Dependence | 308 | 15 | 0.000291 |
| Neurological | Eye     | Eye formation                     | Dependence | 302 | 25 | 0.000079 |
| Neurological | Eye     | Eye formation                     | Withdrawal | 328 | 15 | 0.000028 |
| Neurological | Eye     | Eye morphology                    | Dependence | 308 | 18 | 0.000243 |
| Neurological | Eye     | Eye morphology                    | Withdrawal | 334 | 11 | 0.000123 |
| Neurological | Eye     | Eye morphology - Anterior Segment | Dependence | 318 | 7  | 0.001630 |
| Neurological | Eye     | Eye morphology                    | Withdrawal | 340 | 9  | 0.000554 |
| Neurological | Eye     | Eye morphogenesis                 | Dependence | 338 | 5  | 0.000390 |
| Neurological | Eye     | Photoreceptor abnormalities       | Withdrawal | 340 | 5  | 0.000611 |
| Neurological | Eye     | Morphogenesis camera type eye     | Withdrawal | 341 | 4  | 0.000689 |
| Neurological | Eye     | Morphology of eye cells           | Withdrawal | 342 | 6  | 0.000856 |
| Neurological | Eye     | Retinal Photoresponse             | Withdrawal | 354 | 2  | 0.005500 |
| Neurological | Eye     | Abnormal Ocular Posterior Segment | Withdrawal | 342 | 2  | 0.000720 |
| Face         | Head    | Head development                  | Dependence | 304 | 47 | 0.000120 |
| Face         | Sensory | Sensory organs                    | Dependence | 306 | 29 | 0.000164 |
| Face         | Palate  | Palate                            | Withdrawal | 358 | 1  | 0.007010 |
| Face         | Nose    | Nose                              | Withdrawal | 343 | 3  | 0.001080 |
| Face         | Eye     | Eye morphology - Anterior Segment | Dependence | 318 | 7  | 0.001630 |
| Face         | Eye     | Morphogenesis camera type eye     | Withdrawal | 341 | 4  | 0.000689 |
| Face         | Eye     | Morphology of eye cells           | Withdrawal | 342 | 6  | 0.000856 |

|         |        |                                    |            |     |    |          |
|---------|--------|------------------------------------|------------|-----|----|----------|
| Face    | Eye    | Cornea                             | Dependence | 323 | 3  | 0.002470 |
| Face    | Eye    | Iris Abnormalities                 | Withdrawal | 354 | 2  | 0.005500 |
| Face    | Eye    | Lens                               | Withdrawal | 354 | 3  | 0.005510 |
| Face    | Eye    | Lens                               | Withdrawal | 333 | 4  | 0.000092 |
| Face    | Ear    | Ear                                | Withdrawal | 342 | 7  | 0.000804 |
| Face    | Ear    | Inner ear                          | Dependence | 323 | 9  | 0.002470 |
| Face    | Ear    | Inner ear                          | Dependence | 316 | 8  | 0.001650 |
| Face    | Ear    | Abnormal Morphology of Cochlea     | Dependence | 324 | 6  | 0.002720 |
| Face    | Ear    | Cochlea                            | Withdrawal | 353 | 4  | 0.004870 |
| Face    | Ear    | Cochlea Duct                       | Dependence | 324 | 6  | 0.003620 |
| Face    | Ear    | Spiral Ganglion                    | Withdrawal | 312 | 4  | 0.000720 |
| Face    | Ear    | Spiral Ganglion - small            | Dependence | 342 | 2  | 0.000720 |
| Face    | Ear    | Vestibular Ganglion                | Withdrawal | 318 | 3  | 0.000165 |
| Face    | Ear    | Hair cell morphology disruption    | Dependence | 316 | 5  | 0.001650 |
| Face    | Ear    | Vestibulocochlear nerve            | Withdrawal | 344 | 3  | 0.001200 |
| General | Embryo | Cell growth                        | Dependence | 295 | 27 | 8.20E-06 |
| General | Embryo | Cell growth                        | Dependence | 296 | 83 | 0.000011 |
| General | Embryo | Connective tissue growth           | Dependence | 297 | 37 | 0.000012 |
| General | Embryo | Epithelial growth                  | Dependence | 300 | 30 | 0.000036 |
| General | Embryo | Embryonic growth                   | Dependence | 305 | 27 | 0.001420 |
| General | Embryo | Organismal growth                  | Dependence | 310 | 39 | 0.000361 |
| General | Embryo | Morphogenesis of embryo            | Dependence | 310 | 15 | 0.003680 |
| General | Embryo | Morphogenesis of embryo            | Dependence | 300 | 12 | 0.003580 |
| General | Embryo | Differentiation of embryonic cells | Dependence | 316 | 15 | 0.001240 |
| General | DNA    | DNA transcription                  | Dependence | 298 | 89 | 0.000015 |
| General | DNA    | RNA transcription                  | Dependence | 312 | 71 | 0.000540 |
| General | DNA    | DNA transcription                  | Dependence | 314 | 60 | 0.000765 |
| General | DNA    | Activation endogenous DNA promoter | Dependence | 317 | 49 | 0.001360 |
| General | DNA    | Inhibition endogenous DNA promoter | Withdrawal | 338 | 26 | 0.000358 |

|         |                 |                                           |            |     |    |          |
|---------|-----------------|-------------------------------------------|------------|-----|----|----------|
| General | DNA             | Activation endogenous DNA promoter        | Withdrawal | 357 | 1  | 0.007010 |
| General | DNA             | DNA replication, recombination and repair | Dependence | 317 | 12 | 0.001530 |
| General | DNA             | DNA binding                               | Dependence | 323 | 24 | 0.002360 |
| General | DNA             | DNA synthesis and repair                  | Dependence | 323 | 20 | 0.002590 |
| General | DNA             | GTP Hydrolysis                            | Withdrawal | 344 | 4  | 0.001130 |
| General | DNA             | Chromosomal assembly                      | Withdrawal | 358 | 1  | 0.007010 |
| General | DNA             | Thymidine catabolism                      | Withdrawal | 344 | 1  | 0.007010 |
| General | DNA             | Chromosomal synapsis                      | Dependence | 298 | 7  | 0.000016 |
| General | DNA             | Chromosomal homologous pairing            | Dependence | 302 | 4  | 0.000079 |
| General | DNA             | Chromosomal synapsis                      | Dependence | 306 | 5  | 0.000182 |
| General | DNA             | DNA recombination                         | Dependence | 317 | 12 | 0.001530 |
| General | DNA             | DNA synthesis                             | Dependence | 323 | 20 | 0.002590 |
| General | Mitochondria    | Mitochondria                              | Withdrawal | 357 | 1  | 0.007010 |
| General | Microtubules    | Microtubule dynamics                      | Dependence | 300 | 58 | 0.000033 |
| General | Microtubules    | Microtubules                              | Withdrawal | 352 | 24 | 0.004450 |
| General | Body trunk      | Body trunk                                | Dependence | 317 | 50 | 0.001450 |
| General | Body Axis       | Body Axis                                 | Dependence | 302 | 1  | 0.000193 |
| General | Ovarian reserve | Diminished ovarian reserve                | Withdrawal | 349 | 2  | 0.003080 |
| General | Breast          | Breast cell morphogenesis                 | Dependence | 312 | 3  | 0.000573 |
| General | Breast          | Formation mammary gland                   | Withdrawal | 347 | 7  | 0.002060 |
| General | Breast          | Differentiation of mammary cells          | Withdrawal | 348 | 2  | 0.002580 |
| General | Granulocytes    | Growth of colony forming granulocytes     | Dependence | 312 | 3  | 0.000573 |
| General | Myogenesis      | Germ cell tumour                          | Dependence | 320 | 2  | 0.001770 |
| General | Myogenesis      | carcinoma cell lines                      | Dependence | 320 | 2  | 0.001770 |
| General | Vertebra        | Vertebral formation                       | Dependence | 353 | 3  | 0.004920 |
| General | Bone            | Bone marrow cell homing                   | Dependence | 318 | 3  | 0.001650 |
| General | Bone            | Abnormal bone morphology                  | Dependence | 319 | 20 | 0.001680 |
| General | Bone            | Bone marrow derived macrophages           | Dependence | 319 | 2  | 0.001770 |
| General | Bone            | Development of bone marrow cell lines     | Dependence | 323 | 5  | 0.002440 |

|                  |                  |                                       |            |     |     |          |
|------------------|------------------|---------------------------------------|------------|-----|-----|----------|
| General          | Bone             | Loss bone tissue                      | Dependence | 323 | 3   | 0.002470 |
| General          | Bone             | Movement of Bone marrow cells         | Dependence | 323 | 4   | 0.002480 |
| General          | Bone             | Abnormal bone morphology              | Dependence | 324 | 13  | 0.000140 |
| General          | Bone             | Femoral bone mineral density          | Withdrawal | 326 | 4   | 0.000193 |
| General          | Bone             | Endochondral bone ossification        | Withdrawal | 337 | 4   | 0.000277 |
| General          | Bone             | Abnormal bone morphology              | Withdrawal | 339 | 15  | 0.000431 |
| General          | Bone             | Bone ossification                     | Withdrawal | 343 | 6   | 0.001110 |
| General          | Bone             | Bone mineralization                   | Withdrawal | 349 | 6   | 0.002990 |
| General          | Bone             | Bone marrow cell proliferation        | Withdrawal | 353 | 5   | 0.004660 |
| General          | Bone             | Bone cell line attachment             | Withdrawal | 356 | 1   | 0.007010 |
| General          | Bone             | Bone mineralization of diaphysis      | Withdrawal | 357 | 1   | 0.007010 |
| General          | Bone             | Activation bone cell lines            | Withdrawal | 357 | 1   | 0.007010 |
| General          | Bone             | Bone mineral content trabecular layer | Withdrawal | 357 | 1   | 0.007010 |
| General          | Bone             | Bone marrow cell spreading            | Withdrawal | 357 | 1   | 0.007010 |
| General          | Bone             | Chondrogenesis of chondroprogenitors  | Withdrawal | 357 | 1   | 0.007010 |
| General          | Bone             | Bone mineralization of metaphysis     | Withdrawal | 357 | 1   | 0.007010 |
| General          | Bone             | Bone mineralization of diaphysis      | Withdrawal | 358 | 1   | 0.007010 |
| Limb             | Limb             | Limb morphogenesis in embryo          | Withdrawal | 352 | 4   | 0.004190 |
| Limb             | Limb             | Limb morphogenesis in embryo          | Withdrawal | 354 | 5   | 0.005470 |
| Limb             | Limb             | Apoptosis of limb bud cells           | Withdrawal | 356 | 1   | 0.007010 |
| Limb             | Limb             | Preaxial polydactyly                  | Withdrawal | 333 | 3   | 0.000092 |
| Limb             | Limb             | Polysyndactyly                        | Withdrawal | 345 | 2   | 0.001700 |
| Limb             | Limb             | Polydactyly                           | Withdrawal | 350 | 3   | 0.003300 |
| Gastrointestinal | Gastrointestinal | Gastrointestinal cancer               | Dependence | 249 | 325 | 4.60E-16 |
| Gastrointestinal | Gastrointestinal | Gastrointestinal cancer               | Dependence | 250 | 349 | 7.70E-16 |
| Gastrointestinal | Gastrointestinal | Gastrointestinal tumour               | Dependence | 252 | 252 | 1.01E-15 |
| Gastrointestinal | Gastrointestinal | Gastrointestinal tumour               | Dependence | 253 | 333 | 1.02E-15 |
| Gastrointestinal | Gastrointestinal | Gastrointestinal cancer               | Dependence | 253 | 332 | 1.24E-15 |
| Gastrointestinal | Gastrointestinal | Gastrointestinal tumour               | Dependence | 255 | 352 | 1.49E-15 |

|                  |                  |                                  |            |     |     |          |
|------------------|------------------|----------------------------------|------------|-----|-----|----------|
| Gastrointestinal | Gastrointestinal | Gastrointestinal cancer          | Dependence | 257 | 312 | 6.45E-15 |
| Gastrointestinal | Gastrointestinal | Large Intestinal cancer          | Dependence | 257 | 306 | 7.65E-15 |
| Gastrointestinal | Esophagus        | Gastroesophageal cancer          | Dependence | 262 | 169 | 3.15E-13 |
| Gastrointestinal | Esophagus        | Gastroesophageal cancer          | Dependence | 265 | 171 | 1.53E-12 |
| Gastrointestinal | Esophagus        | Esophageal cancer                | Dependence | 320 | 22  | 0.001880 |
| Gastrointestinal | Esophagus        | Esophageal lesion                | Dependence | 324 | 31  | 0.002750 |
| Gastrointestinal | Esophagus        | Esophageal cancer                | Withdrawal | 347 | 15  | 0.002020 |
| Gastrointestinal | Esophagus        | Esophageal lesion                | Withdrawal | 348 | 16  | 0.002770 |
| Gastrointestinal | Esophagus        | Gastroesophageal adenocarcinoma  | Withdrawal | 354 | 38  | 0.005250 |
| Gastrointestinal | Large Intestine  | Large Intestinal carcinoma       | Dependence | 257 | 306 | 7.65E-15 |
| Gastrointestinal | Large Intestine  | Large Intestinal carcinoma       | Dependence | 258 | 304 | 1.11E-14 |
| Gastrointestinal | Large Intestine  | Large Intestinal carcinoma       | Dependence | 260 | 314 | 6.40E-14 |
| Gastrointestinal | Large Intestine  | Large Intestinal carcinoma       | Dependence | 261 | 313 | 7.15E-14 |
| Gastrointestinal | Large Intestine  | Large Intestinal adenocarcinoma  | Withdrawal | 326 | 120 | 7.45E-06 |
| Gastrointestinal | Large Intestine  | Large Intestinal neoplasm        | Withdrawal | 331 | 122 | 0.000068 |
| Gastrointestinal | Large Intestine  | Large Intestinal carcinoma       | Withdrawal | 333 | 121 | 0.000108 |
| Gastrointestinal | Large Intestine  | Enteric ganglia                  | Dependence | 308 | 3   | 0.000274 |
| Gastrointestinal | Liver            | Hepatobiliary carcinoma          | Dependence | 284 | 176 | 1.28E-07 |
| Gastrointestinal | Liver            | Hepatobiliary carcinoma          | Dependence | 286 | 228 | 2.29E-07 |
| Gastrointestinal | Pancreas         | Pancreatobiliary cancer          | Dependence | 288 | 124 | 9.10E-07 |
| Gastrointestinal | Pancreas         | Pancreatic cancer                | Dependence | 290 | 181 | 2.64E-06 |
| Gastrointestinal | Pancreas         | Pancreatic cancer                | Dependence | 297 | 90  | 0.000012 |
| Gastrointestinal | Pancreas         | Pancreatic tumour                | Dependence | 297 | 95  | 0.000012 |
| Gastrointestinal | Pancreas         | Pancreatic tumour                | Dependence | 298 | 106 | 0.000013 |
| Gastrointestinal | Pancreas         | Pancreatic adenocarcinoma        | Dependence | 300 | 85  | 0.000033 |
| Gastrointestinal | Pancreas         | Pancreatic ductal adenocarcinoma | Dependence | 301 | 82  | 0.000060 |
| Gastrointestinal | Pancreas         | Pancreatic cell line migration   | Dependence | 323 | 6   | 0.002390 |
| Gastrointestinal | Pancreas         | Pancreatic cell line invasion    | Withdrawal | 353 | 3   | 0.005210 |
| Gastrointestinal | Pancreas         | Pancreatic cell line G1 phase    | Withdrawal | 353 | 2   | 0.006200 |

|                  |                |                                      |            |     |    |          |
|------------------|----------------|--------------------------------------|------------|-----|----|----------|
| Gastrointestinal | Pancreas       | Pancreatic cancer                    | Withdrawal | 355 | 36 | 0.006460 |
| Gastrointestinal | Pancreas       | Pancreatic cancer                    | Withdrawal | 355 | 71 | 0.005920 |
| Body Wall        | Body           | Body trunk development               | Dependence | 317 | 50 | 0.001450 |
| Body Wall        | Body           | Body trunk development               | Withdrawal | 340 | 26 | 0.000555 |
| Body Wall        | Body           | Body axis development                | Dependence | 302 | 50 | 0.000078 |
| Body Wall        | Body           | Body axis development                | Withdrawal | 336 | 25 | 0.000193 |
| Body Wall        | Body           | Myogenesis germ cell tumour lines    | Dependence | 320 | 2  | 0.001770 |
| Body Wall        | Body           | Myogenesis carcinoma tumour lines    | Dependence | 320 | 2  | 0.001770 |
| Body Wall        | Body           | Development of abdomen               | Dependence | 317 | 28 | 0.001620 |
| Body Wall        | Embryo         | Morphogenesis embryonic tissue       | Dependence | 300 | 12 | 0.000036 |
| Body Wall        | Embryo         | Embryonic growth                     | Dependence | 305 | 27 | 0.000142 |
| Body Wall        | Embryo         | Embryonic morphogenesis              | Dependence | 310 | 15 | 0.003680 |
| Body Wall        | Embryo         | Differentiation embryonic cells      | Dependence | 315 | 15 | 0.00124  |
| Body Wall        | Embryo         | Differentiation embryonic stem cells | Dependence | 322 | 8  | 0.002320 |
| Body Wall        | Embryo         | Embryonic growth                     | Dependence | 324 | 16 | 0.002810 |
| Body Wall        | Embryo         | Quantity of embryo                   | Withdrawal | 348 | 6  | 0.002320 |
| Body Wall        | Embryo         | Stimulation of embryonic tissue      | Withdrawal | 356 | 2  | 0.006950 |
| Uronephrology    | Urinary system | Urinary system morphology            | Dependence | 322 | 17 | 0.000220 |
| Uronephrology    | Urinary system | Familial anomalies Urinary tract     | Withdrawal | 352 | 8  | 0.004400 |
| Uronephrology    | Kidney         | Renal agenesis                       | Dependence | 311 | 5  | 0.000429 |
| Uronephrology    | Kidney         | Morphology of renal tubule           | Dependence | 313 | 8  | 0.000606 |
| Uronephrology    | Kidney         | Morphology of kidney                 | Dependence | 322 | 16 | 0.002160 |
| Uronephrology    | Kidney         | Renal lesion                         | Dependence | 322 | 48 | 0.002200 |
| Uronephrology    | Kidney         | Abnormal Morphology of renal tubule  | Dependence | 323 | 7  | 0.002550 |
| Uronephrology    | Kidney         | Proximal tubular toxicity            | Withdrawal | 352 | 4  | 0.004190 |
| Chromosomes      | Chromosomes    | Homologous pairing of chromosomes    | Dependence | 302 | 4  | 0.000079 |
| Chromosomes      | Chromosomes    | Assembly of Chromosomes              | Withdrawal | 358 | 1  | 0.007010 |
| Chromosomes      | Chromosomes    | Chromosomal synapsis                 | Dependence | 298 | 7  | 0.000016 |
| Chromosomes      | Chromosomes    | Chromosomal synapsis                 | Dependence | 306 | 5  | 0.000182 |

|              |         |                                            |            |     |    |          |
|--------------|---------|--------------------------------------------|------------|-----|----|----------|
| Neurological | Synapse | Glutamnergic synapse                       | Dependence | 236 | 29 | 3.11E-04 |
| Neurological | Synapse | Neuronal synapse                           | Dependence | 236 | 53 | 7.10E-05 |
| Neurological | Synapse | Dopaminergic Synapse                       | Dependence | 236 | 29 | 3.12E-05 |
| Neurological | Synapse | Dopaminergic Synapse                       | Dependence | 236 | 27 | 0.007806 |
| Neurological | Synapse | Retrograde endocannabinoid signalling      | Dependence | 236 | 24 | 0.000511 |
| Neurological | Synapse | Long term depression                       | Dependence | 236 | 17 | 0.000582 |
| Neurological | Synapse | Long term potentiation                     | Dependence | 236 | 17 | 0.001768 |
| Neurological | Synapse | Morphine addiction                         | Dependence | 236 | 20 | 0.004349 |
| Neurological | Synapse | Serotonergic Synapse                       | Dependence | 237 | 21 | 0.018174 |
| Neurological | Synapse | Cholinergic Synapse                        | Dependence | 237 | 19 | 0.060483 |
| Neurological | Synapse | GABAergic synapse                          | Dependence | 238 | 15 | 0.081486 |
| Neurological | Synapse | Synaptic transmission                      | Dependence | 308 | 20 | 0.000291 |
| Neurological | Synapse | Synaptic Organization                      | Dependence | 310 | 8  | 0.000338 |
| Neurological | Synapse | Inhibitory post-synaptic potential         | Dependence | 321 | 5  | 0.001890 |
| Neurological | Synapse | Maturation of synapse                      | Dependence | 323 | 4  | 0.002480 |
| Neurological | Synapse | Synaptic transmission                      | Withdrawal | 334 | 12 | 0.000143 |
| Neurological | Synapse | Long term potentiation excitatory synapses | Withdrawal | 337 | 2  | 0.000291 |
| Neurological | Synapse | Development of synapses                    | Withdrawal | 344 | 8  | 0.001210 |
| Neurological | Synapse | Excitatory post-synaptic potential         | Withdrawal | 344 | 6  | 0.001250 |
| Neurological | Synapse | Synaptic transmission                      | Withdrawal | 346 | 4  | 0.002020 |
| Neurological | Synapse | Density of synapse                         | Withdrawal | 352 | 3  | 0.004640 |
| Neurological | Synapse | Binding presynaptic membrane               | Withdrawal | 357 | 1  | 0.007010 |



Supplementary Table S34.: Summary Epigenomic Hits for All Congenital Anomalies by Organ Target, Schrott EWAS Database

| Target                  | Mean P-Value | Median P-Value |
|-------------------------|--------------|----------------|
| Gastrointestinal        | 2.51E-15     | 1.13E-15       |
| Liver                   | 1.79E-07     | 1.79E-07       |
| Large Intestine         | 5.72E-05     | 3.73E-06       |
| Brain                   | 0.0015       | 3.70E-05       |
| Atrioventricular valves | 6.96E-04     | 4.00E-05       |
| Pancreas                | 0.0022       | 4.65E-05       |
| Head                    | 1.20E-04     | 1.20E-04       |
| Chromosomes             | 0.0018       | 1.31E-04       |
| Heart                   | 7.56E-04     | 1.57E-04       |
| Sensory                 | 1.64E-04     | 1.64E-04       |
| Body Axis               | 1.93E-04     | 1.93E-04       |
| Neurons                 | 0.0012       | 0.0003         |
| Embryo                  | 0.0011       | 0.0004         |
| Granulocytes            | 5.73E-04     | 5.73E-04       |
| Ventricle               | 5.82E-04     | 6.09E-04       |
| Neurological            | 5.43E-04     | 6.15E-04       |
| Eye                     | 0.0015       | 0.0007         |
| Nose                    | 0.0011       | 0.0011         |
| Cerebrum                | 0.0017       | 0.0013         |
| DNA                     | 0.0021       | 0.0014         |
| Body                    | 0.0011       | 0.0015         |
| Body trunk              | 0.0015       | 0.0015         |
| Synapse                 | 0.0090       | 0.0015         |
| Ear                     | 0.0019       | 0.0017         |
| Atria                   | 0.0016       | 0.0017         |
| Myogenesis              | 0.0018       | 0.0018         |
| Cardiovascular          | 0.0017       | 0.0019         |
| Esophagus               | 0.0021       | 0.0020         |
| Breast                  | 0.0017       | 0.0021         |
| Kidney                  | 0.0020       | 0.0022         |
| Microtubules            | 0.0022       | 0.0022         |
| Urinary system          | 0.0023       | 0.0023         |
| Embryo                  | 0.0024       | 0.0023         |
| Bone                    | 0.0037       | 0.0025         |
| Ovarian reserve         | 0.0031       | 0.0031         |
| Limb                    | 0.0036       | 0.0037         |
| Vertebra                | 0.0049       | 0.0049         |
| Mitochondria            | 0.0070       | 0.0070         |
| Palate                  | 0.0070       | 0.0070         |

Supplementary Table S35.: P-Values for Cancers from Schrott EWAS Database

| Cancer                                                                 | Code  | Status     | Page | P_Value  | Gene_Number |
|------------------------------------------------------------------------|-------|------------|------|----------|-------------|
| T-Lymphoblastic Leukaemia / Lymphoma                                   | ALL   | Dependence | 300  | 4.08E-05 | 20          |
| G1/G1 Phase Transition Leukaemia Cell Lines                            | ALL   | Dependence | 310  | 0.000406 | 3           |
| Philadelphia Chromosome Negative Acute Lymphoblastic Leukaemia         | ALL   | Withdrawal | 340  | 0.000601 | 4           |
| B-Lymphoblastic Leukaemia / Lymphoma w Recurrent Genetic Abnormalities | ALL   | Withdrawal | 340  | 0.00611  | 5           |
| Acute Leukemia                                                         | ALL   | Withdrawal | 341  | 0.000626 | 36          |
| Precursor B-cell Acute Lymphoblastic Leukaemia                         | ALL   | Withdrawal | 341  | 0.000684 | 16          |
| Acute Lymphoblastic Leukaemia                                          | ALL   | Withdrawal | 348  | 0.00248  | 17          |
| T-Lymphoblastic Leukaemia / Lymphoma                                   | ALL   | Withdrawal | 348  | 0.00257  | 9           |
| B-Cell Leukaemia                                                       | ALL   | Withdrawal | 349  | 0.00311  | 17          |
| Chemotherapy Refractory ALL                                            | ALL   | Withdrawal | 350  | 0.00362  | 2           |
| E2A-PBX B-Cell ALL                                                     | ALL   | Withdrawal | 351  | 0.00412  | 3           |
| Philadelphia-Like B-cell ALL                                           | ALL   | Withdrawal | 352  | 0.00438  | 3           |
| KMT2A-Rearrangement B-Cell ALL                                         | ALL   | Withdrawal | 353  | 0.00464  | 3           |
| Philadelphia Positive B-Cell ALL                                       | ALL   | Withdrawal | 354  | 0.00582  | 3           |
| Maturation Acute Myeloblastic Leukaemia Cell Lines                     | AML   | Dependence | 314  | 0.000896 | 2           |
| Non-M3 Acute Myeloid Leukaemia                                         | AML   | Dependence | 323  | 0.00257  | 9           |
| Acute Leukemia                                                         | AML   | Withdrawal | 341  | 0.000626 | 36          |
| Brain glioma                                                           | Brain | Dependence | 284  | 1.39E-07 | 227         |
| Brain tumour                                                           | Brain | Dependence | 286  | 2.29E-07 | 228         |
| High grade Astrocytoma                                                 | Brain | Dependence | 294  | 5.95E-06 | 179         |
| Brain astrocytoma                                                      | Brain | Dependence | 294  | 6.45E-06 | 173         |
| Brain cancer                                                           | Brain | Dependence | 308  | 0.000269 | 98          |
| Brain cell - cell movement                                             | Brain | Dependence | 319  | 0.00174  | 8           |

|                                               |        |            |     |          |     |
|-----------------------------------------------|--------|------------|-----|----------|-----|
| Brain astrocytoma                             | Brain  | Withdrawal | 330 | 5.12E-05 | 77  |
| Brain tumour                                  | Brain  | Withdrawal | 337 | 2.56E-04 | 94  |
| Brain glioma                                  | Brain  | Withdrawal | 339 | 0.00052  | 92  |
| Brain cell - cell movement                    | Brain  | Withdrawal | 347 | 0.00204  | 5   |
| Glioma                                        | Brain  | Dependence | 281 | 5.33E-08 | 235 |
| Glioma cancer                                 | Brain  | Dependence | 282 | 6.69E-08 | 231 |
| Brain glioma                                  | Brain  | Dependence | 284 | 1.39E-07 | 227 |
| Grade 3-4 Glioma cancer                       | Brain  | Dependence | 289 | 2.18E-06 | 194 |
| Grade IV High grade glioma cancer             | Brain  | Dependence | 293 | 5.70E-05 | 173 |
| Gliomatosis cerebri                           | Brain  | Dependence | 307 | 0.000197 | 94  |
| Grade IV High grade glioma cancer             | Brain  | Withdrawal | 329 | 0.000047 | 77  |
| Glioma                                        | Brain  | Withdrawal | 330 | 0.000063 | 98  |
| Grade 3-4 Glioma cancer                       | Brain  | Withdrawal | 337 | 0.000266 | 82  |
| Glioma cancer                                 | Brain  | Withdrawal | 338 | 0.000305 | 94  |
| Glioma cancer                                 | Brain  | Withdrawal | 339 | 0.00052  | 92  |
| Astrocytoma                                   | Brain  | Dependence | 291 | 3.52E-06 | 181 |
| Astrocytoma                                   | Brain  | Dependence | 293 | 5.70E-06 | 173 |
| Astrocytoma High grade                        | Brain  | Dependence | 294 | 5.95E-06 | 179 |
| Astrocytoma                                   | Brain  | Dependence | 294 | 6.45E-06 | 179 |
| Astrocytoma High grade                        | Brain  | Withdrawal | 326 | 8.42E-06 | 82  |
| Astrocytoma Grade IV                          | Brain  | Withdrawal | 329 | 4.77E-05 | 77  |
| Astrocytoma                                   | Brain  | Withdrawal | 330 | 5.12E-05 | 77  |
| Breast / Colorectal cancer                    | Breast | Dependence | 280 | 3.25E-08 | 233 |
| Breast / Pancreatic cancer                    | Breast | Dependence | 290 | 2.64E-06 | 181 |
| Breast / Ovarian cancer                       | Breast | Dependence | 304 | 0.000116 | 121 |
| Breast cancer cell lines morphogenesis        | Breast | Dependence | 312 | 0.000573 | 3   |
| Breast / Ovarian cancer                       | Breast | Dependence | 315 | 0.000965 | 133 |
| Breast cancer cell lines metastatic potential | Breast | Dependence | 316 | 0.00131  | 3   |

|                                                            |            |            |     |          |     |
|------------------------------------------------------------|------------|------------|-----|----------|-----|
| Breast cancer cell lines cell proliferation                | Breast     | Withdrawal | 344 | 0.00127  | 14  |
| Breast / Gynaecological cancer                             | Breast     | Withdrawal | 346 | 0.00201  | 91  |
| Breast / Pancreatic cancer                                 | Breast     | Withdrawal | 355 | 0.00592  | 71  |
| Breast cancer cell lines cell division                     | Breast     | Withdrawal | 358 | 0.00701  | 1   |
| Philadelphia Chromosome Positive Chronic Myeloid Leukaemia | CML        | Dependence | 307 | 0.000213 | 5   |
| Apoptosis Chronic Myeloid Leukaemia Cell Lines             | CML        | Dependence | 319 | 0.00177  | 2   |
| Refractory Chronic Myeloid Leukaemia                       | CML        | Dependence | 321 | 0.00196  | 4   |
| Imatinib Resistant CML in Blast Crisis                     | CML        | Withdrawal | 347 | 0.00212  | 2   |
| Imatinib Resistant CML                                     | CML        | Withdrawal | 349 | 0.00308  | 2   |
| Imatinib Resistant CML in Accelerated Phase                | CML        | Withdrawal | 349 | 0.00308  | 2   |
| Accelerated Phase CML                                      | CML        | Withdrawal | 354 | 0.00521  | 3   |
| Imatinib Resistant Philadelphia positive CML               | CML        | Withdrawal | 356 | 0.00695  | 2   |
| Colorectal / Breast cancer                                 | Colorectal | Dependence | 280 | 3.25E-08 | 233 |
| Colon carcinoma                                            | Colorectal | Dependence | 264 | 7.27E-13 | 195 |
| Colorectal carcinoma                                       | Colorectal | Dependence | 266 | 1.59E-12 | 201 |
| Colon carcinoma                                            | Colorectal | Dependence | 267 | 2.04E-12 | 199 |
| Colon carcinoma                                            | Colorectal | Dependence | 268 | 2.30E-12 | 197 |
| Colon carcinoma                                            | Colorectal | Dependence | 268 | 2.84E-12 | 191 |
| Colon carcinoma                                            | Colorectal | Dependence | 275 | 7.38E-11 | 213 |
| Colon carcinoma                                            | Colorectal | Dependence | 278 | 1.95E-10 | 214 |
| Colon carcinoma                                            | Colorectal | Withdrawal | 341 | 0.000617 | 74  |
| Colon carcinoma                                            | Colorectal | Withdrawal | 341 | 0.000687 | 71  |
| Colon carcinoma                                            | Colorectal | Withdrawal | 342 | 0.000748 | 70  |
| Colon carcinoma                                            | Colorectal | Withdrawal | 342 | 0.000867 | 72  |
| Colon carcinoma                                            | Colorectal | Withdrawal | 344 | 0.00129  | 72  |
| Colon carcinoma                                            | Colorectal | Withdrawal | 352 | 0.00476  | 78  |
| Rectum tumour                                              | Colorectal | Dependence | 311 | 0.00045  | 32  |
| Rectum tumour                                              | Colorectal | Dependence | 318 | 0.00155  | 30  |

|                                      |            |            |     |          |     |
|--------------------------------------|------------|------------|-----|----------|-----|
| Rectum tumour                        | Colorectal | Dependence | 320 | 0.00182  | 29  |
| Rectum tumour                        | Colorectal | Withdrawal | 348 | 0.00229  | 15  |
| Gastroesophageal carcinoma           | Esophagus  | Dependence | 262 | 3.15E-13 | 169 |
| Gastroesophageal carcinoma           | Esophagus  | Dependence | 265 | 1.53E-12 | 171 |
| Gastroesophageal carcinoma           | Esophagus  | Dependence | 282 | 9.77E-08 | 103 |
| Esophageal adenocarcinoma            | Esophagus  | Dependence | 320 | 0.00188  | 22  |
| Gastroesophageal carcinoma           | Esophagus  | Withdrawal | 331 | 0.000068 | 64  |
| Esophageal carcinoma                 | Esophagus  | Withdrawal | 347 | 0.00202  | 15  |
| Gastroesophageal adenocarcinoma      | Esophagus  | Withdrawal | 354 | 0.00525  | 38  |
| Renal clear cell carcinoma           | Kidney     | Dependence | 315 | 0.00101  | 41  |
| Upper renal tract carcinoma          | Kidney     | Dependence | 324 | 0.00283  | 48  |
| Liver carcinoma                      | Liver      | Dependence | 283 | 1.17E-08 | 168 |
| Liver carcinoma                      | Liver      | Dependence | 287 | 2.52E-07 | 171 |
| Liver carcinoma                      | Liver      | Dependence | 186 | 5.13E-06 | 186 |
| Liver tumour                         | Liver      | Dependence | 292 | 5.13E-06 | 186 |
| Hepatobiliary system cancer          | Liver      | Dependence | 286 | 2.47E-07 | 179 |
| Melanoma - cutaneous                 | Melanoma   | Dependence | 256 | 3.70E-15 | 281 |
| Melanoma                             | Melanoma   | Dependence | 258 | 2.36E-14 | 298 |
| Melanoma                             | Melanoma   | Withdrawal | 326 | 7.71E-06 | 110 |
| Melanoma                             | Melanoma   | Withdrawal | 330 | 6.21E-05 | 115 |
| Myeloma - cell lines cell death      | Myeloma    | Withdrawal | 345 | 0.00159  | 5   |
| Myeloma - cell lines apoptosis       | Myeloma    | Withdrawal | 355 | 0.00622  | 4   |
| Myeloma - cell lines cell adhesion   | Myeloma    | Withdrawal | 357 | 0.00701  | 1   |
| B-Cell Non-Hodgkin Lymphoma          | NHL        | Dependence | 303 | 9.67E-05 | 45  |
| Non-Hodgkin Lymphoma                 | NHL        | Dependence | 307 | 0.000208 | 55  |
| Lymphoma - Hodgkins / DLBCNHL        | NHL        | Dependence | 314 | 0.000777 | 3   |
| B-Cell Non-Hodgkin Lymphoma          | NHL        | Withdrawal | 354 | 0.0057   | 19  |
| T-Lymphoblastic Leukaemia / Lymphoma | NHL        | Dependence | 300 | 4.08E-05 | 20  |

|                                                             |            |            |     |          |     |
|-------------------------------------------------------------|------------|------------|-----|----------|-----|
| B-cell Lymphoma                                             | NHL        | Dependence | 301 | 5.17E-05 | 48  |
| Lymphoma                                                    | NHL        | Dependence | 303 | 0.000101 | 64  |
| Diffuse Lymphoma                                            | NHL        | Dependence | 313 | 0.000629 | 35  |
| Diffuse B-cell Lymphoma                                     | NHL        | Dependence | 315 | 0.000927 | 32  |
| High Grade Lymphoma                                         | NHL        | Dependence | 324 | 0.00269  | 20  |
| B-Cell Non-Hodgkin Lymphoma Recurrent Genetic Abnormalities | NHL        | Withdrawal | 340 | 0.000611 | 5   |
| B-Cell Lymphoblastic Lymphoma                               | NHL        | Withdrawal | 343 | 0.000891 | 4   |
| T-Cell Lymphoblastic Leukaemia / Lymphoma                   | NHL        | Withdrawal | 348 | 0.00257  | 9   |
| KMT2A-Rearrangement B-Cell Lymphoma                         | NHL        | Withdrawal | 353 | 0.00464  | 3   |
| B-Cell Acute Lymphoblastic Lymphoma                         | NHL        | Withdrawal | 355 | 0.00646  | 3   |
| Upper aerodigestive tract carcinoma                         | Oropharynx | Dependence | 283 | 1.25E-07 | 97  |
| Upper aerodigestive tract carcinoma                         | Oropharynx | Dependence | 285 | 1.82E-06 | 98  |
| Upper aerodigestive tract carcinoma                         | Oropharynx | Withdrawal | 327 | 1.60E-05 | 44  |
| Ovarian / Breast                                            | Ovary      | Dependence | 304 | 0.000116 | 121 |
| Ovarian / Breast                                            | Ovary      | Dependence | 315 | 0.000965 | 133 |
| Ovarian cancer                                              | Ovary      | Dependence | 305 | 0.00014  | 68  |
| Ovarian Tumour                                              | Ovary      | Dependence | 308 | 0.000257 | 74  |
| Ovarian cancer                                              | Ovary      | Dependence | 312 | 0.000562 | 71  |
| Ovarian adenocarcinoma                                      | Ovary      | Dependence | 314 | 0.000792 | 62  |
| Ovarian cancer                                              | Ovary      | Withdrawal | 356 | 0.00701  | 1   |
| Pancreatic / Breast cancer                                  | Pancreas   | Dependence | 290 | 2.64E-06 | 181 |
| Pancreatic / Breast cancer                                  | Pancreas   | Withdrawal | 355 | 0.00592  | 71  |
| Pancreatobiliary tumour                                     | Pancreas   | Dependence | 288 | 9.10E-07 | 124 |
| Pancreatic cancer                                           | Pancreas   | Dependence | 297 | 1.19E-05 | 95  |
| Pancreatic cancer                                           | Pancreas   | Dependence | 298 | 1.26E-06 | 106 |
| Pancreatic cancer                                           | Pancreas   | Dependence | 299 | 0.000021 | 90  |
| Pancreatic cancer                                           | Pancreas   | Dependence | 300 | 0.000033 | 85  |
| Pancreatic cancer                                           | Pancreas   | Dependence | 301 | 0.00006  | 82  |

|                                             |          |            |     |          |     |
|---------------------------------------------|----------|------------|-----|----------|-----|
| Pancreatic cancer cell lines cell migration | Pancreas | Dependence | 323 | 0.00239  | 6   |
| Pancreatic cancer cell lines cell invasion  | Pancreas | Withdrawal | 353 | 0.00521  | 3   |
| Pancreatic cancer cell lines G1 phase       | Pancreas | Withdrawal | 355 | 0.0062   | 2   |
| Pancreatic cancer                           | Pancreas | Withdrawal | 356 | 0.00646  | 36  |
| Prostate cancer                             | Prostate | Dependence | 279 | 2.88E-08 | 148 |
| Prostatic adenocarcinoma                    | Prostate | Dependence | 287 | 8.39E-07 | 123 |
| Prostatic carcinoma                         | Prostate | Dependence | 288 | 9.39E-07 | 128 |
| Prostate cancer                             | Prostate | Withdrawal | 340 | 5.33E-04 | 59  |
| Prostatic adenocarcinoma                    | Prostate | Withdrawal | 350 | 0.00349  | 48  |
| Prostatic carcinoma                         | Prostate | Withdrawal | 50  | 0.00363  | 50  |
| Prostate cancer cell adhesion               | Prostate | Withdrawal | 357 | 0.00701  | 1   |
| Gastroesophageal carcinoma                  | Stomach  | Dependence | 262 | 3.15E-13 | 169 |
| Gastroesophageal carcinoma                  | Stomach  | Dependence | 265 | 1.53E-12 | 171 |
| Gastroesophageal carcinoma                  | Stomach  | Dependence | 282 | 9.77E-08 | 103 |
| Gastroesophageal carcinoma                  | Stomach  | Withdrawal | 331 | 0.000068 | 64  |
| Gastroesophageal adenocarcinoma             | Stomach  | Withdrawal | 354 | 0.00525  | 38  |
| Male Genital Neoplasm                       | Testis   | Dependence | 279 | 1.14E-08 | 153 |
| Malignant Male Genital Neoplasm             | Testis   | Dependence | 279 | 1.60E-08 | 151 |
| Male Genital Neoplasm                       | Testis   | Withdrawal | 341 | 6.75E-04 | 60  |
| Thyroid                                     | Thyroid  | Dependence | 241 | 1.21E-17 | 318 |
| Thyroid                                     | Thyroid  | Dependence | 242 | 1.26E-17 | 319 |
| Thyroid                                     | Thyroid  | Withdrawal | 345 | 0.00141  | 115 |
| Genitourinary adenocarcinoma                | Urinary  | Dependence | 259 | 2.54E-14 | 259 |
| Genitourinary adenocarcinoma                | Urinary  | Dependence | 271 | 1.08E-11 | 277 |
| Malignant genitourinary solid tumour        | Urinary  | Dependence | 277 | 1.08E-10 | 277 |
| Genitourinary adenocarcinoma                | Urinary  | Dependence | 277 | 1.15E-10 | 277 |
| Urinary tract cancer                        | Urinary  | Dependence | 320 | 0.00189  | 84  |
| Morphology of urinary system                | Urinary  | Dependence | 322 | 0.0022   | 17  |

|                                      |         |            |     |          |     |
|--------------------------------------|---------|------------|-----|----------|-----|
| Genitourinary adenocarcinoma         | Urinary | Withdrawal | 336 | 0.000216 | 97  |
| Genitourinary adenocarcinoma         | Urinary | Withdrawal | 338 | 0.000322 | 359 |
| Malignant genitourinary solid tumour | Urinary | Withdrawal | 339 | 0.000466 | 111 |
| Genitourinary tumour                 | Urinary | Withdrawal | 340 | 0.000547 | 112 |



Supplementary Table S36.: P-Values for Cannabinoid-Cancer Association –  
Overall Schrott Data, Ordered by Minimum P-Value

| <b>Cancer</b> | <b>Number of Annotations</b> | <b>Median Gene Number</b> | <b>Cumulative Gene Number</b> | <b>Minimum P-Value</b> | <b>Mean P-Value</b> | <b>Median P-Value</b> |
|---------------|------------------------------|---------------------------|-------------------------------|------------------------|---------------------|-----------------------|
| Thyroid       | 3                            | 318                       | 752                           | 1.21E-17               | 4.70E-04            | 1.26E-17              |
| Melanoma      | 4                            | 198                       | 804                           | 3.70E-15               | 1.75E-05            | 3.86E-06              |
| Urinary       | 10                           | 186                       | 1870                          | 2.54E-14               | 5.64E-04            | 2.69E-04              |
| Stomach       | 5                            | 103                       | 545                           | 3.15E-13               | 0.0011              | 9.77E-08              |
| Esophagus     | 7                            | 64                        | 582                           | 3.15E-13               | 0.0013              | 6.80E-05              |
| Colorectal    | 18                           | 76                        | 2186                          | 7.27E-13               | 8.38E-04            | 5.34E-04              |
| Testis        | 3                            | 151                       | 364                           | 1.14E-08               | 2.25E-04            | 1.60E-08              |
| Liver         | 5                            | 179                       | 890                           | 1.17E-08               | 2.15E-06            | 2.52E-07              |
| Prostate      | 7                            | 59                        | 557                           | 2.88E-08               | 0.0021              | 0.0005                |
| Breast        | 10                           | 81                        | 851                           | 3.25E-08               | 0.0019              | 0.0011                |
| Brain         | 28                           | 98                        | 3726                          | 5.33E-08               | 2.31E-04            | 4.74E-05              |
| Oropharynx    | 3                            | 97                        | 239                           | 1.25E-07               | 5.98E-06            | 1.82E-06              |
| Pancreas      | 12                           | 84                        | 881                           | 9.10E-07               | 0.0022              | 0.0000                |
| NHL           | 15                           | 20                        | 365                           | 4.08E-05               | 0.0018              | 0.0008                |
| ALL           | 14                           | 4.5                       | 141                           | 4.08E-05               | 0.0028              | 0.0028                |
| Ovary         | 7                            | 71                        | 530                           | 1.16E-04               | 0.0014              | 0.0006                |
| CML           | 8                            | 2                         | 22                            | 2.13E-04               | 0.0030              | 0.0026                |
| AML           | 3                            | 9                         | 47                            | 6.26E-04               | 0.0014              | 0.0009                |
| Kidney        | 2                            | 45                        | 89                            | 0.00101                | 0.0019              | 0.0019                |
| Myeloma       | 3                            | 4                         | 10                            | 0.00159                | 0.0049              | 0.0062                |

Supplementary Table S37.: P-Values for Cannabinoid-Cancer Association –  
Overall Schrott Data, Ordered by Median P-Value

| Cancer     | Number of Annotations | Median Gene Number | Cumulative Gene Number | Minimum P-Value | Mean P-Value | Median P-Value |
|------------|-----------------------|--------------------|------------------------|-----------------|--------------|----------------|
|            |                       |                    |                        |                 |              |                |
| Thyroid    | 3                     | 318                | 752                    | 1.21E-17        | 4.70E-04     | 1.26E-17       |
| Testis     | 3                     | 151                | 364                    | 1.14E-08        | 2.25E-04     | 1.60E-08       |
| Stomach    | 5                     | 103                | 545                    | 3.15E-13        | 0.0011       | 9.77E-08       |
| Liver      | 5                     | 179                | 890                    | 1.17E-08        | 2.15E-06     | 2.52E-07       |
| Oropharynx | 3                     | 97                 | 239                    | 1.25E-07        | 5.98E-06     | 1.82E-06       |
| Melanoma   | 4                     | 198                | 804                    | 3.70E-15        | 1.75E-05     | 3.86E-06       |
| Pancreas   | 12                    | 83.5               | 881                    | 9.10E-07        | 0.0022       | 0.0000         |
| Brain      | 28                    | 98                 | 3726                   | 5.33E-08        | 2.31E-04     | 4.74E-05       |
| Esophagus  | 7                     | 64                 | 582                    | 3.15E-13        | 0.0013       | 6.80E-05       |
| Urinary    | 10                    | 185.5              | 1870                   | 2.54E-14        | 5.64E-04     | 2.69E-04       |
| Prostate   | 7                     | 59                 | 557                    | 2.88E-08        | 0.0021       | 0.0005         |
| Colorectal | 18                    | 76                 | 2186                   | 7.27E-13        | 8.38E-04     | 5.34E-04       |
| Ovary      | 7                     | 71                 | 530                    | 1.16E-04        | 0.0014       | 0.0006         |
| NHL        | 15                    | 20                 | 365                    | 4.08E-05        | 0.0018       | 0.0008         |
| AML        | 3                     | 9                  | 47                     | 6.26E-04        | 0.0014       | 0.0009         |
| Breast     | 10                    | 81                 | 851                    | 3.25E-08        | 0.0019       | 0.0011         |
| Kidney     | 2                     | 44.5               | 89                     | 0.0010          | 0.0019       | 0.0019         |
| CML        | 8                     | 2                  | 22                     | 2.13E-04        | 0.0030       | 0.0026         |
| ALL        | 14                    | 4.5                | 141                    | 4.08E-05        | 0.0028       | 0.0028         |
| Myeloma    | 3                     | 4                  | 10                     | 0.0016          | 0.0049       | 0.0062         |

Supplementary Table S38.: P-Values for Cannabinoid-Cancer Association – Cannabis Dependency, Schrott Data, Ordered by Minimum P-Value

| Cancer     | Number of Annotations | Median Gene Number | Cumulative Gene Number | Minimum P-Value | Mean P-Value | Median P-Value |
|------------|-----------------------|--------------------|------------------------|-----------------|--------------|----------------|
| Thyroid    | 6                     | 115                | 637                    | 1.21E-17        | 1.24E-17     | 1.24E-17       |
| Melanoma   | 8                     | 112.5              | 579                    | 3.70E-15        | 1.36E-14     | 1.36E-14       |
| Urinary    | 60                    | 111.5              | 1191                   | 2.54E-14        | 0.0007       | 1.12E-10       |
| Esophagus  | 28                    | 38                 | 465                    | 3.15E-13        | 4.70E-04     | 4.89E-08       |
| Stomach    | 15                    | 51                 | 443                    | 3.15E-13        | 3.26E-08     | 1.53E-12       |
| Colorectal | 198                   | 72                 | 1734                   | 7.27E-13        | 3.47E-04     | 7.38E-11       |
| Testis     | 6                     | 60                 | 304                    | 1.14E-08        | 1.37E-08     | 1.37E-08       |
| Liver      | 25                    | -                  | 890                    | 1.17E-08        | 2.15E-06     | 2.52E-07       |
| Prostate   | 21                    | 49                 | 399                    | 2.88E-08        | 6.02E-07     | 8.39E-07       |
| Breast     | 60                    | 42.5               | 674                    | 3.25E-08        | 4.94E-04     | 3.45E-04       |
| Brain      | 448                   | 82                 | 2779                   | 5.33E-08        | 1.44E-04     | 5.82E-06       |
| Oropharynx | 6                     | 44                 | 195                    | 1.25E-07        | 9.73E-07     | 9.73E-07       |
| Pancreas   | 96                    | 19.5               | 769                    | 9.10E-07        | 3.15E-04     | 1.65E-05       |
| ALL        | 28                    | 4.5                | 23                     | 4.08E-05        | 2.23E-04     | 2.23E-04       |
| NHL        | 135                   | 4.5                | 322                    | 4.08E-05        | 6.13E-04     | 2.08E-04       |
| Ovary      | 42                    | 1                  | 529                    | 1.16E-04        | 4.72E-04     | 4.10E-04       |
| CML        | 24                    | 2                  | 11                     | 2.13E-04        | 0.0013       | 0.0018         |
| AML        | 6                     | 36                 | 11                     | 8.96E-04        | 0.0017       | 0.0017         |
| Kidney     | 4                     | -                  | 89                     | 0.0010          | 0.0019       | 0.0019         |

Supplementary Table S39.: P-Values for Cannabinoid-Cancer Association – Cannabis Dependency, Schrott Data, Ordered by Median P-Value

| Cancer     | Number of Annotations | Median Gene Number | Cumulative Gene Number | Minimum P-Value | Mean P-Value | Median P-Value |
|------------|-----------------------|--------------------|------------------------|-----------------|--------------|----------------|
| Thyroid    | 6                     | 115                | 637                    | 1.21E-17        | 1.24E-17     | 1.24E-17       |
| Melanoma   | 8                     | 112.5              | 579                    | 3.70E-15        | 1.36E-14     | 1.36E-14       |
| Stomach    | 15                    | 51                 | 443                    | 3.15E-13        | 3.26E-08     | 1.53E-12       |
| Colorectal | 198                   | 72                 | 1734                   | 7.27E-13        | 3.47E-04     | 7.38E-11       |
| Urinary    | 60                    | 111.5              | 1191                   | 2.54E-14        | 0.0007       | 1.12E-10       |
| Testis     | 6                     | 60                 | 304                    | 1.14E-08        | 1.37E-08     | 1.37E-08       |
| Esophagus  | 28                    | 38                 | 465                    | 3.15E-13        | 4.70E-04     | 4.89E-08       |
| Liver      | 25                    | -                  | 890                    | 1.17E-08        | 2.15E-06     | 2.52E-07       |
| Prostate   | 21                    | 49                 | 399                    | 2.88E-08        | 6.02E-07     | 8.39E-07       |
| Oropharynx | 6                     | 44                 | 195                    | 1.25E-07        | 9.73E-07     | 9.73E-07       |
| Brain      | 448                   | 82                 | 2779                   | 5.33E-08        | 1.44E-04     | 5.82E-06       |
| Pancreas   | 96                    | 19.5               | 769                    | 9.10E-07        | 3.15E-04     | 1.65E-05       |
| NHL        | 135                   | 4.5                | 322                    | 4.08E-05        | 6.13E-04     | 2.08E-04       |
| ALL        | 28                    | 4.5                | 23                     | 4.08E-05        | 2.23E-04     | 2.23E-04       |
| Breast     | 60                    | 42.5               | 674                    | 3.25E-08        | 4.94E-04     | 3.45E-04       |
| Ovary      | 42                    | 1                  | 529                    | 1.16E-04        | 4.72E-04     | 4.10E-04       |
| AML        | 6                     | 36                 | 11                     | 8.96E-04        | 0.0017       | 0.0017         |
| CML        | 24                    | 2                  | 11                     | 2.13E-04        | 0.0013       | 0.0018         |
| Kidney     | 4                     | -                  | 89                     | 0.0010          | 0.0019       | 0.0019         |

Supplementary Table S40.: P-Values for Cannabinoid-Cancer Association – Cannabis Withdrawal,  
Schrott Data, Ordered by Minimum P-Value

| Cancer     | Number of Annotations | Median Gene Number | Cumulative Gene Number | Minimum P-Value | Mean P-Value | Median P-Value |
|------------|-----------------------|--------------------|------------------------|-----------------|--------------|----------------|
| Melanoma   | 8                     | 112.5              | 225                    | 7.71E-06        | 3.49E-05     | 3.49E-05       |
| Brain      | 336                   | 82                 | 947                    | 8.42E-06        | 3.48E-04     | 1.60E-04       |
| Oropharynx | 3                     | 44                 | 44                     | 1.60E-05        | 1.60E-05     | 1.60E-05       |
| Esophagus  | 21                    | 38                 | 117                    | 6.80E-05        | 0.0024       | 0.0020         |
| Stomach    | 10                    | 51                 | 102                    | 6.80E-05        | 0.0027       | 0.0027         |
| Urinary    | 40                    | 111.5              | 679                    | 2.16E-04        | 3.88E-04     | 3.94E-04       |
| Prostate   | 28                    | 49                 | 158                    | 5.33E-04        | 0.0037       | 0.0036         |
| ALL        | 168                   | 4.5                | 118                    | 6.01E-04        | 0.0032       | 0.0034         |
| NHL        | 90                    | 4.5                | 43                     | 6.11E-04        | 0.0035       | 0.0036         |
| Colorectal | 126                   | 72                 | 452                    | 6.17E-04        | 0.0016       | 8.67E-04       |
| AML        | 3                     | 36                 | 36                     | 6.26E-04        | 6.26E-04     | 6.26E-04       |
| Testis     | 3                     | 60                 | 60                     | 6.75E-04        | 6.75E-04     | 6.75E-04       |
| Breast     | 40                    | 42.5               | 177                    | 0.00127         | 0.0041       | 0.0040         |
| Thyroid    | 3                     | 115                | 115                    | 0.00141         | 0.0014       | 0.0014         |
| Myeloma    | 9                     | 4                  | 10                     | 0.00159         | 0.0049       | 0.0062         |
| CML        | 40                    | 2                  | 11                     | 0.00212         | 0.0041       | 0.0031         |
| Pancreas   | 48                    | 19.5               | 112                    | 0.00521         | 0.0059       | 0.0061         |
| Ovary      | 7                     | 1                  | 1                      | 0.00701         | 0.0070       | 0.0070         |

Supplementary Table S41.: P-Values for Cannabinoid-Cancer Association – Cannabis Withdrawal,  
Schrott Data, Ordered by Median P-Value

| Cancer     | Number of Annotations | Median Gene Number | Cumulative Gene Number | Minimum P-Value | Mean P-Value | Median P-Value |
|------------|-----------------------|--------------------|------------------------|-----------------|--------------|----------------|
| Oropharynx | 3                     | 44                 | 44                     | 1.60E-05        | 1.60E-05     | 1.60E-05       |
| Melanoma   | 8                     | 112.5              | 225                    | 7.71E-06        | 3.49E-05     | 3.49E-05       |
| Brain      | 336                   | 82                 | 947                    | 8.42E-06        | 3.48E-04     | 1.60E-04       |
| Urinary    | 40                    | 111.5              | 679                    | 2.16E-04        | 3.88E-04     | 3.94E-04       |
| AML        | 3                     | 36                 | 36                     | 6.26E-04        | 6.26E-04     | 6.26E-04       |
| Testis     | 3                     | 60                 | 60                     | 6.75E-04        | 6.75E-04     | 6.75E-04       |
| Colorectal | 126                   | 72                 | 452                    | 6.17E-04        | 0.0016       | 8.67E-04       |
| Thyroid    | 3                     | 115                | 115                    | 0.00141         | 0.0014       | 0.0014         |
| Esophagus  | 21                    | 38                 | 117                    | 6.80E-05        | 0.0024       | 0.0020         |
| Stomach    | 10                    | 51                 | 102                    | 6.80E-05        | 0.0027       | 0.0027         |
| CML        | 40                    | 2                  | 11                     | 0.00212         | 0.0041       | 0.0031         |
| ALL        | 168                   | 4.5                | 118                    | 6.01E-04        | 0.0032       | 0.0034         |
| Prostate   | 28                    | 49                 | 158                    | 5.33E-04        | 0.0037       | 0.0036         |
| NHL        | 90                    | 4.5                | 43                     | 6.11E-04        | 0.0035       | 0.0036         |
| Breast     | 40                    | 42.5               | 177                    | 0.00127         | 0.0041       | 0.0040         |
| Pancreas   | 48                    | 19.5               | 112                    | 0.00521         | 0.0059       | 0.0061         |
| Myeloma    | 9                     | 4                  | 10                     | 0.00159         | 0.0049       | 0.0062         |
| Ovary      | 7                     | 1                  | 1                      | 0.00701         | 0.0070       | 0.0070         |

Supplementary Table S42.: Contrast of Cannabis Dependence and Withdrawal  
Significance Levels and Gene Numbers, Schrott Data

| Cancer     | Minimum P-<br>Value<br>Dependence | Minimum P-<br>Value<br>Withdrawal | P-Value<br>Ratio | Total Gene<br>Number<br>Dependence | Total Gene<br>Number<br>Withdrawal | Gene Number<br>Ratio |
|------------|-----------------------------------|-----------------------------------|------------------|------------------------------------|------------------------------------|----------------------|
|            |                                   |                                   |                  |                                    |                                    |                      |
| Ovary      | 1.16E-04                          | 0.0070                            | 60.43            | 529                                | 1                                  | 529.00               |
| NHL        | 4.08E-05                          | 6.11E-04                          | 14.98            | 322                                | 43                                 | 7.49                 |
| Pancreas   | 9.10E-07                          | 0.0052                            | 5.73E+03         | 769                                | 112                                | 6.87                 |
| Thyroid    | 1.21E-17                          | 0.0014                            | 1.17E+14         | 637                                | 115                                | 5.54                 |
| Testis     | 1.14E-08                          | 6.75E-04                          | 5.92E+04         | 304                                | 60                                 | 5.07                 |
| Oropharynx | 1.25E-07                          | 1.60E-05                          | 128.00           | 195                                | 44                                 | 4.43                 |
| Stomach    | 3.15E-13                          | 6.80E-05                          | 2.16E+08         | 443                                | 102                                | 4.34                 |
| Esophagus  | 3.15E-13                          | 6.80E-05                          | 2.16E+08         | 465                                | 117                                | 3.97                 |
| Colorectal | 7.27E-13                          | 6.17E-04                          | 8.49E+08         | 1734                               | 452                                | 3.84                 |
| Breast     | 3.25E-08                          | 0.0013                            | 3.91E+04         | 674                                | 177                                | 3.81                 |
| Brain      | 5.33E-08                          | 8.42E-06                          | 157.97           | 2779                               | 947                                | 2.93                 |
| Melanoma   | 3.70E-15                          | 7.71E-06                          | 2.08E+09         | 579                                | 225                                | 2.57                 |
| Prostate   | 2.88E-08                          | 5.33E-04                          | 1.85E+04         | 399                                | 158                                | 2.53                 |
| Urinary    | 2.54E-14                          | 2.16E-04                          | 8.50E+09         | 1191                               | 679                                | 1.75                 |
| CML        | 2.13E-04                          | 0.0021                            | 9.95             | 11                                 | 11                                 | 1.00                 |
| AML        | 8.96E-04                          | 6.26E-04                          | 0.70             | 11                                 | 36                                 | 0.31                 |
| ALL        | 4.08E-05                          | 6.01E-04                          | 14.73            | 23                                 | 118                                | 0.19                 |
| Liver      | 1.17E-08                          | NA                                | NA               | 890                                | NA                                 | NA                   |
| Kidney     | 0.00101                           | NA                                | NA               | 89                                 | NA                                 | NA                   |
| Myeloma    | NA                                | 0.0016                            | NA               | NA                                 | 10                                 | NA                   |

Negative Log (Base 10) P-Value by System

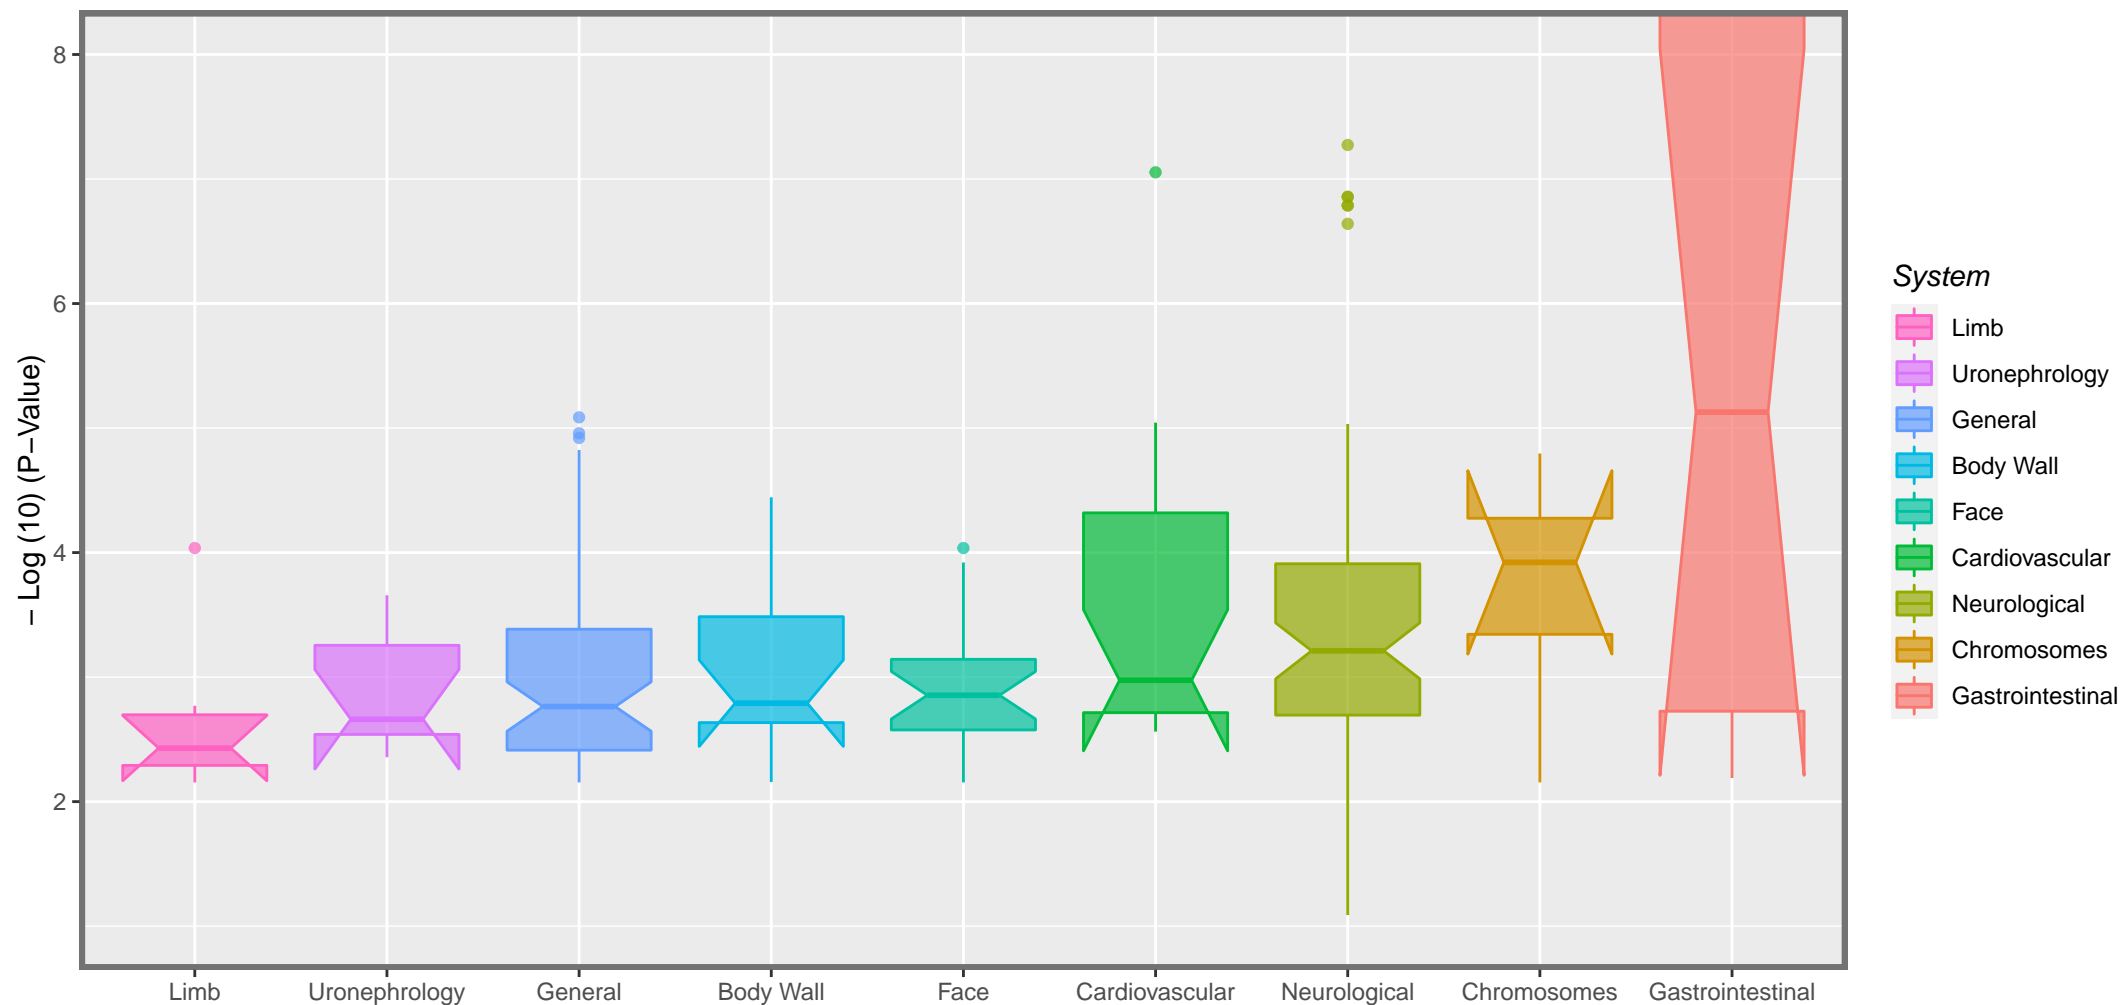



# Negative Log (Base 10) P-Value by Target

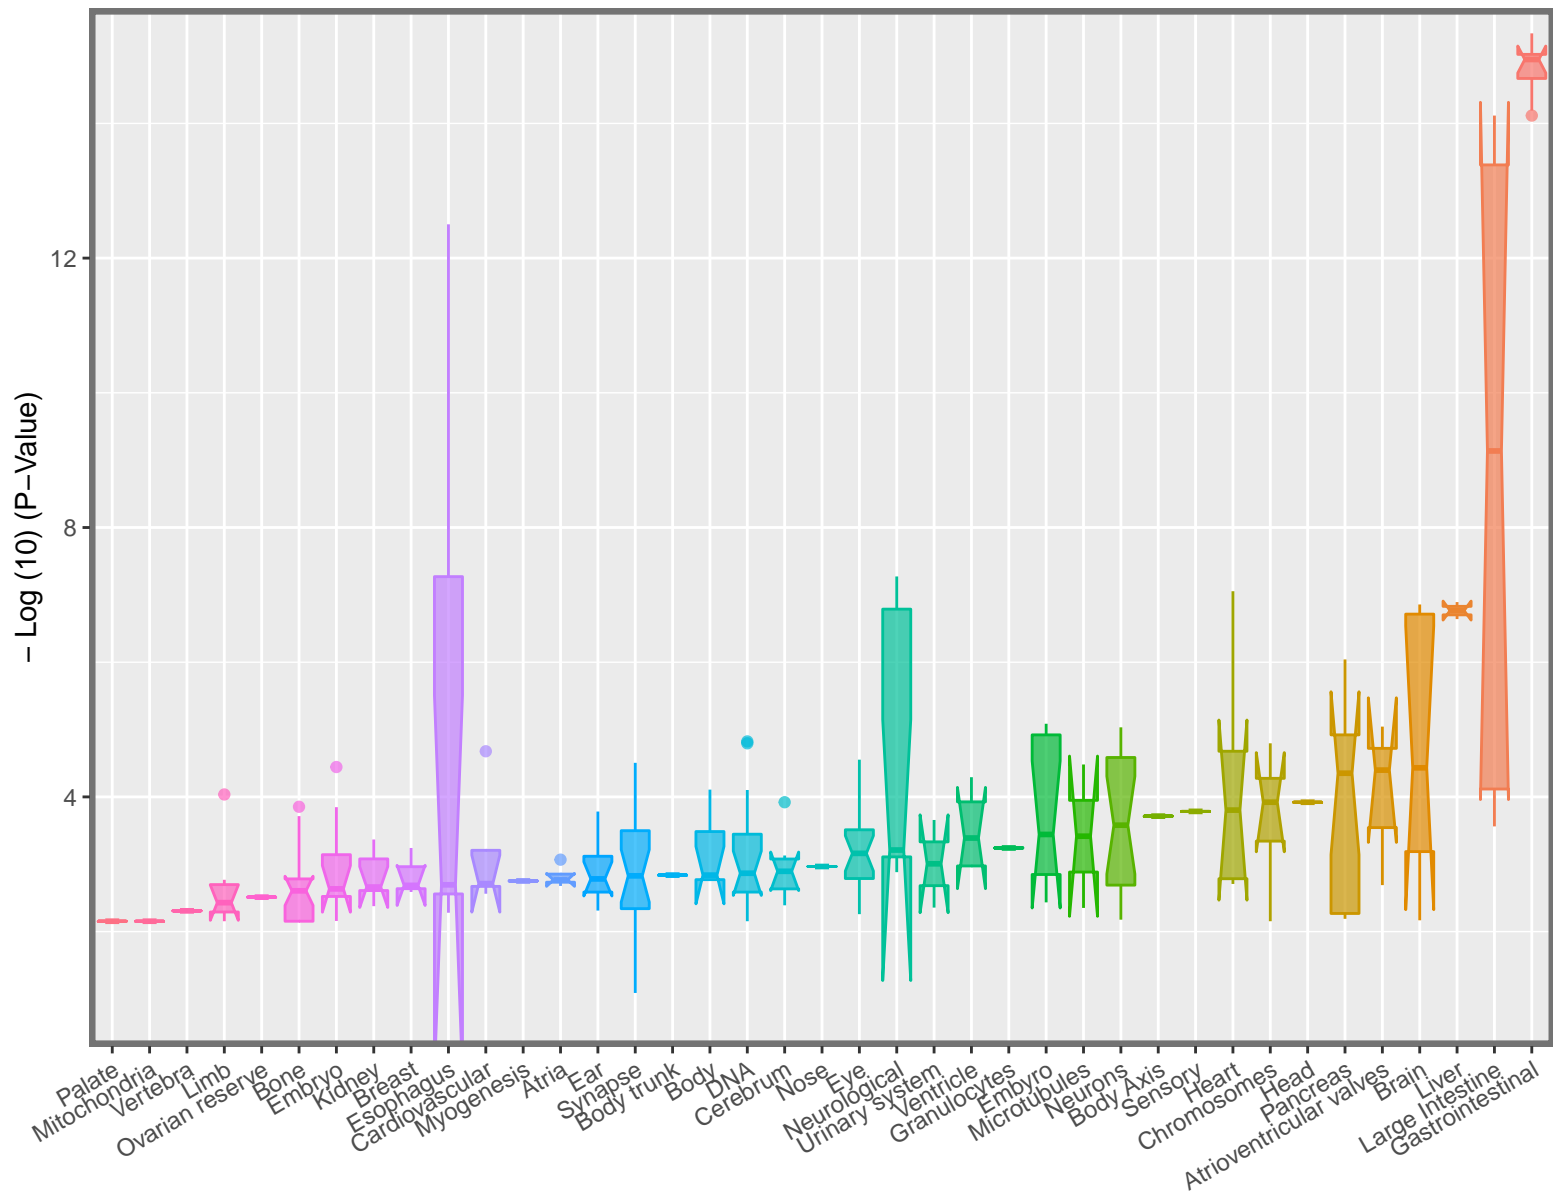

Negative Log P-Value by Dependency Status

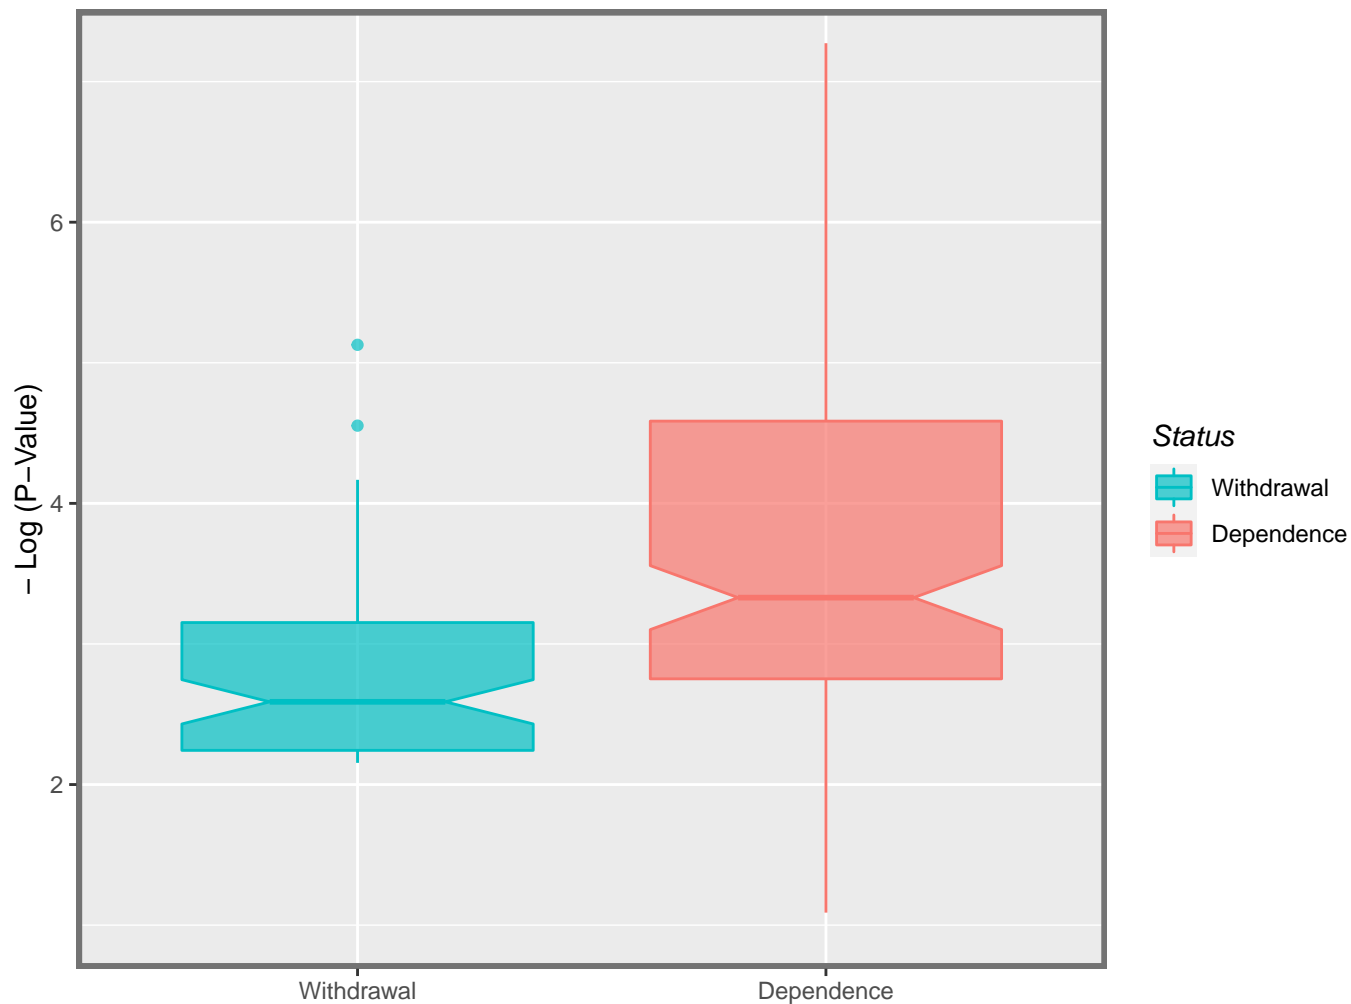

A

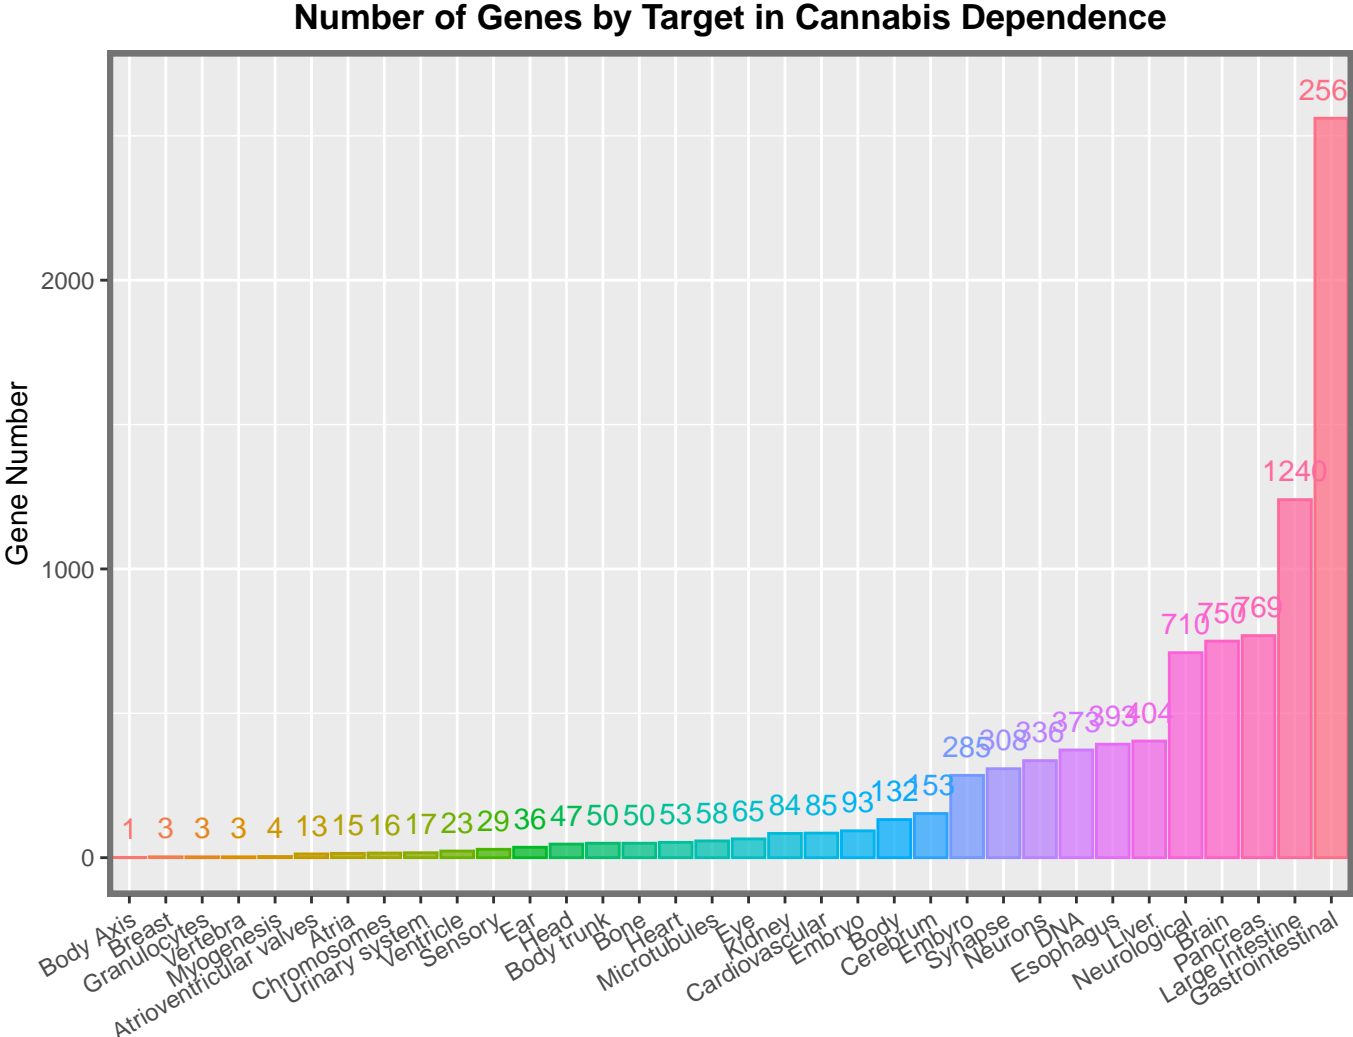

B

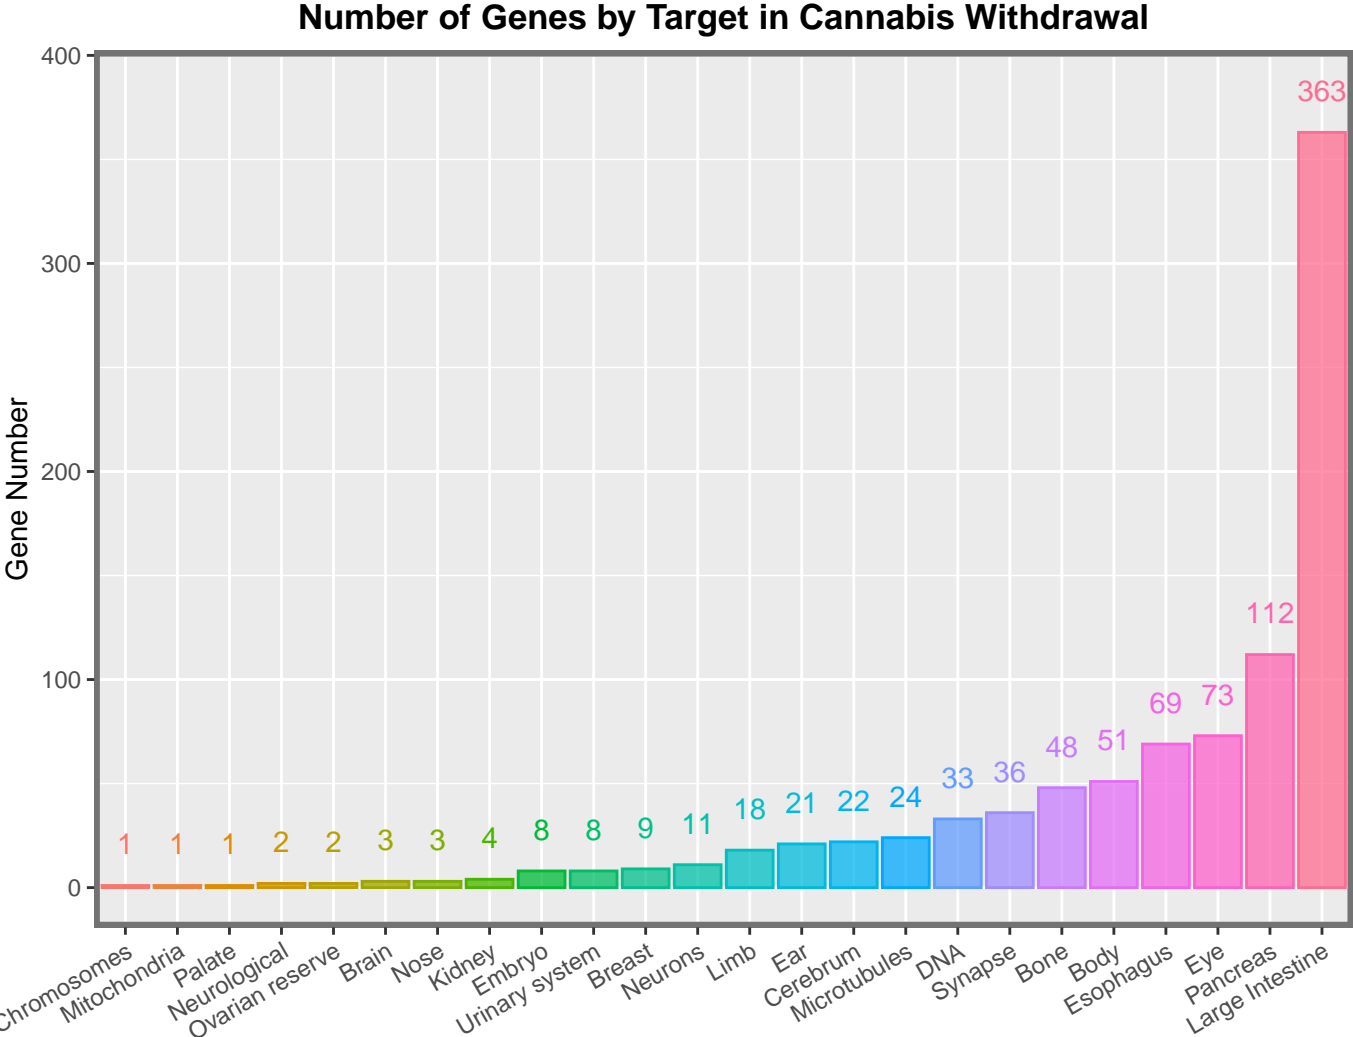

A

Number of Annotations by Cancer Type

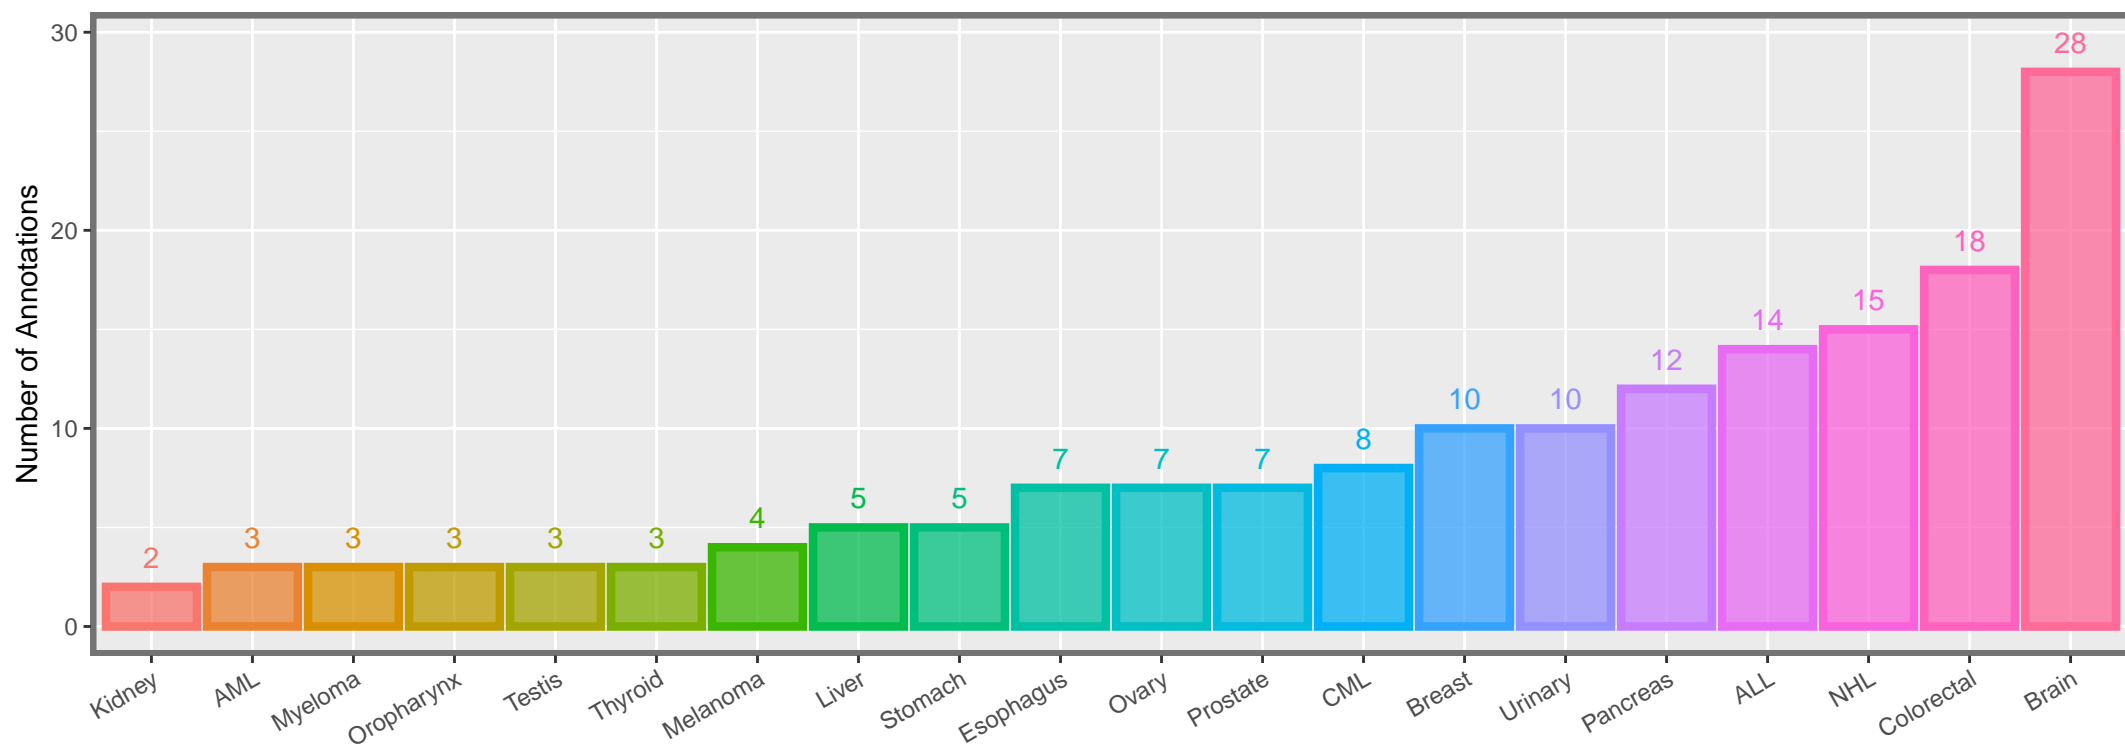

B

Cumulative Gene Number by Cancer Type

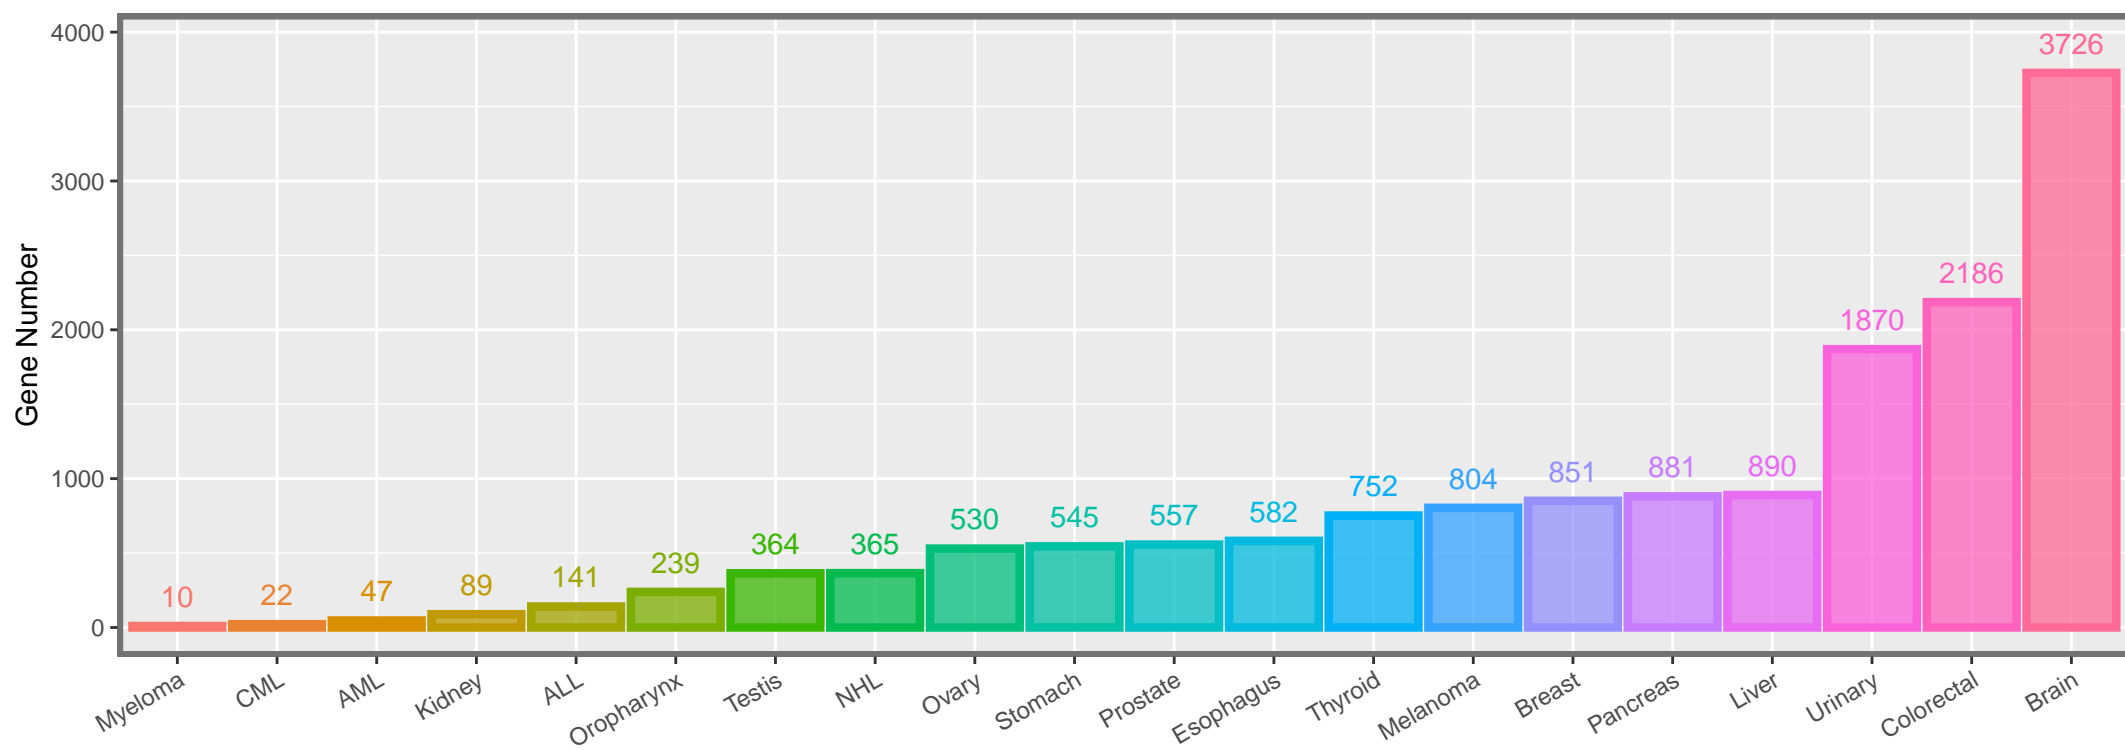

C

Negative Log P-Value by Cancer Type

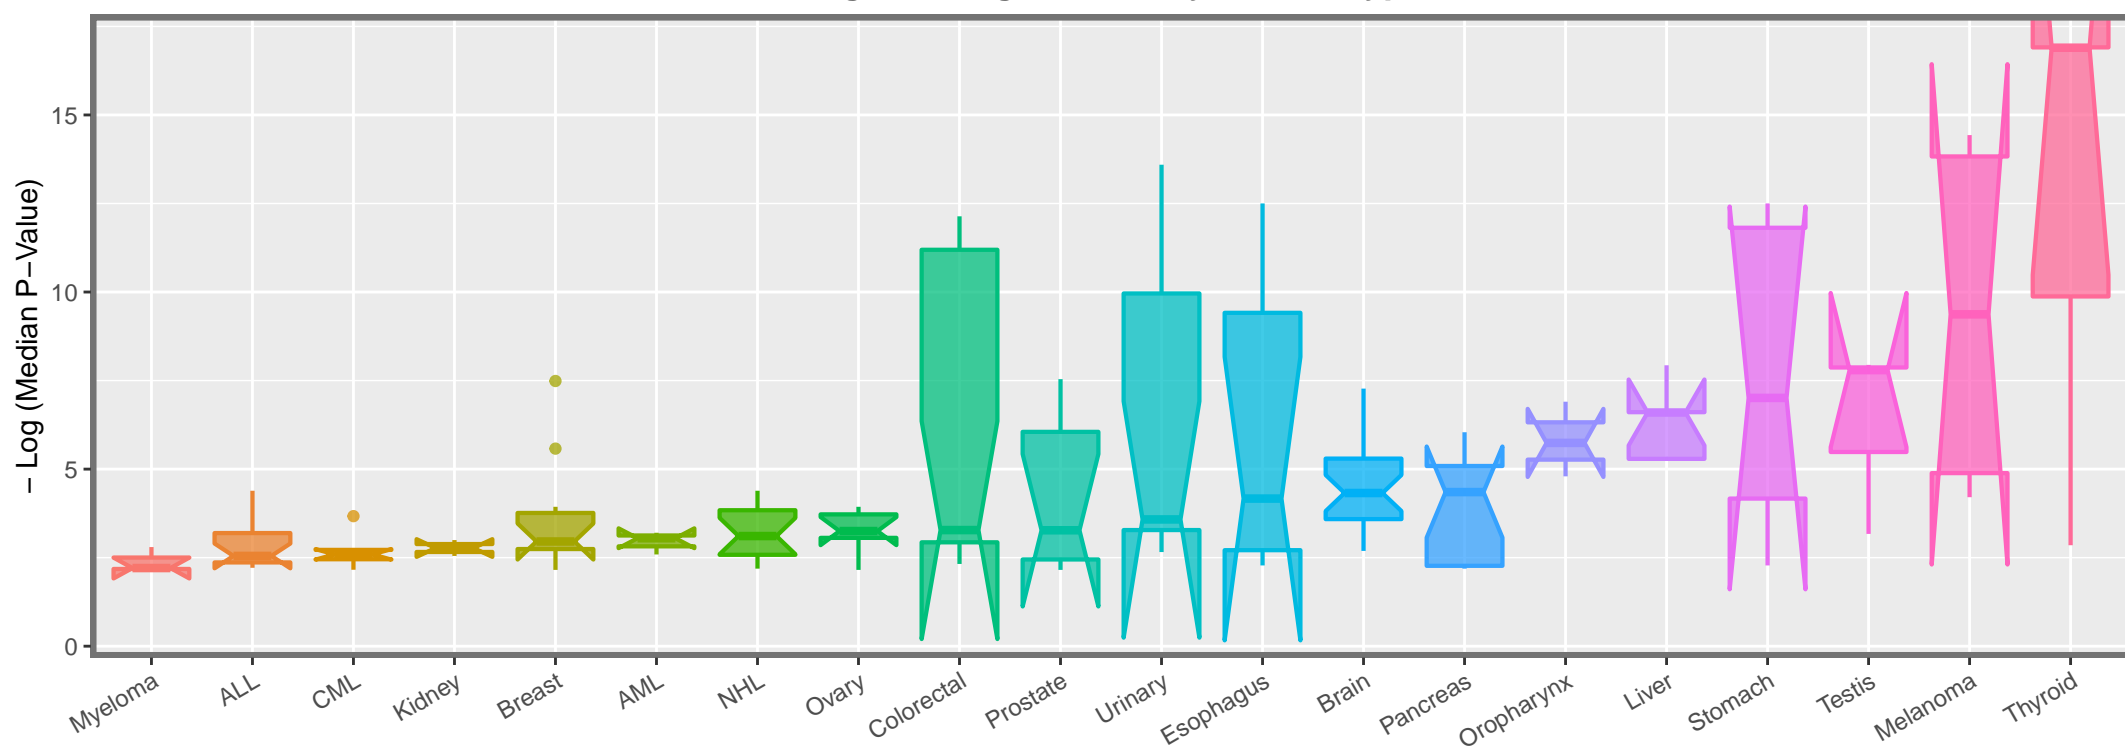

A

Negative Log P-Value by Cancer Type in Cannabis Dependence

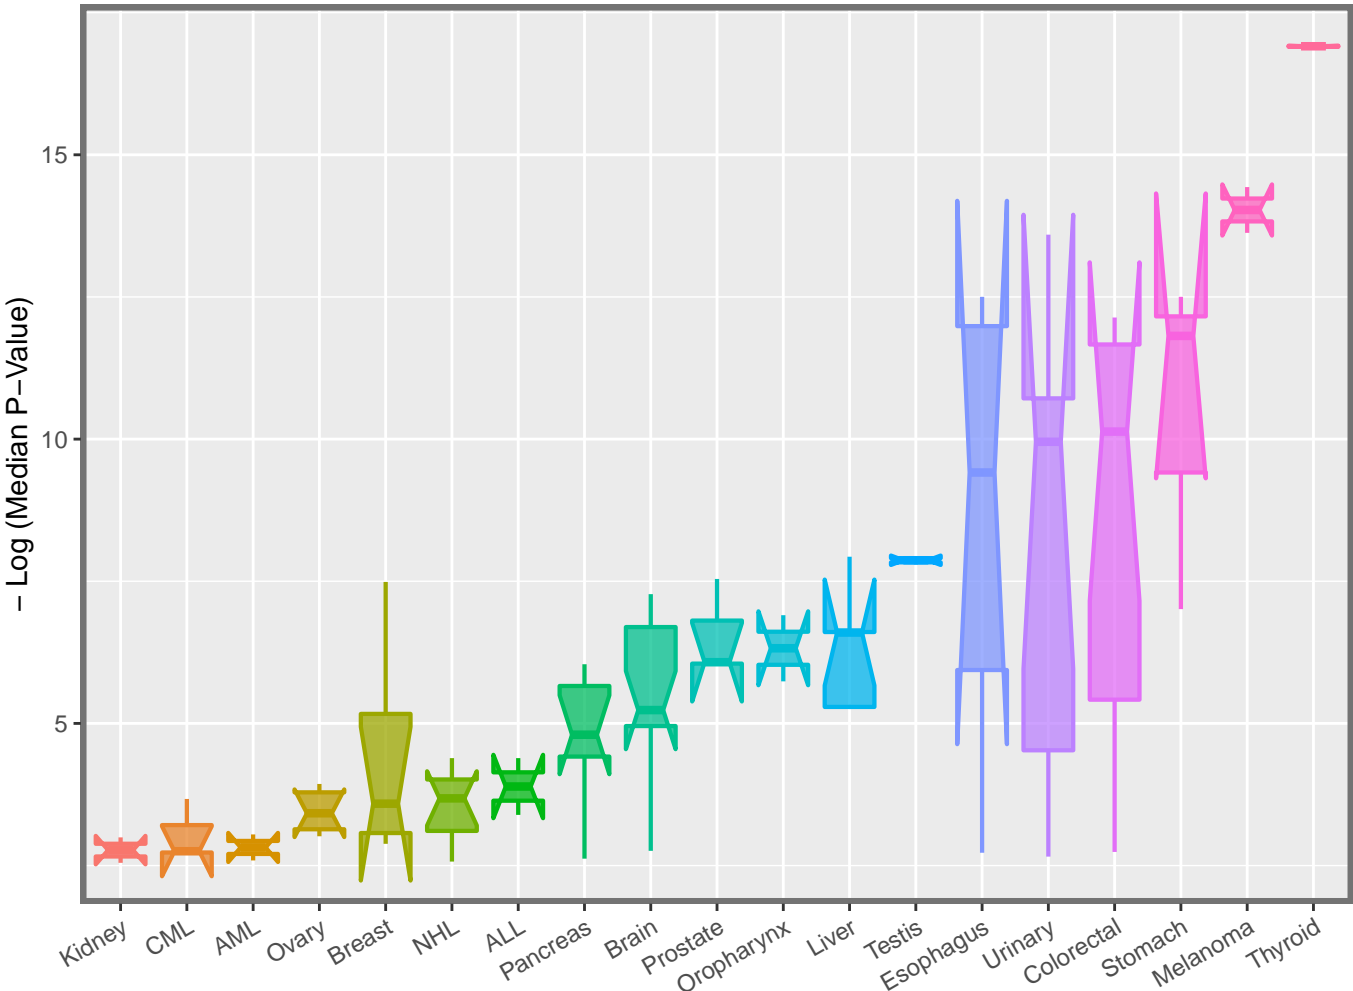

B

Negative Log P-Value by Cancer Type in Cannabis Withdrawal

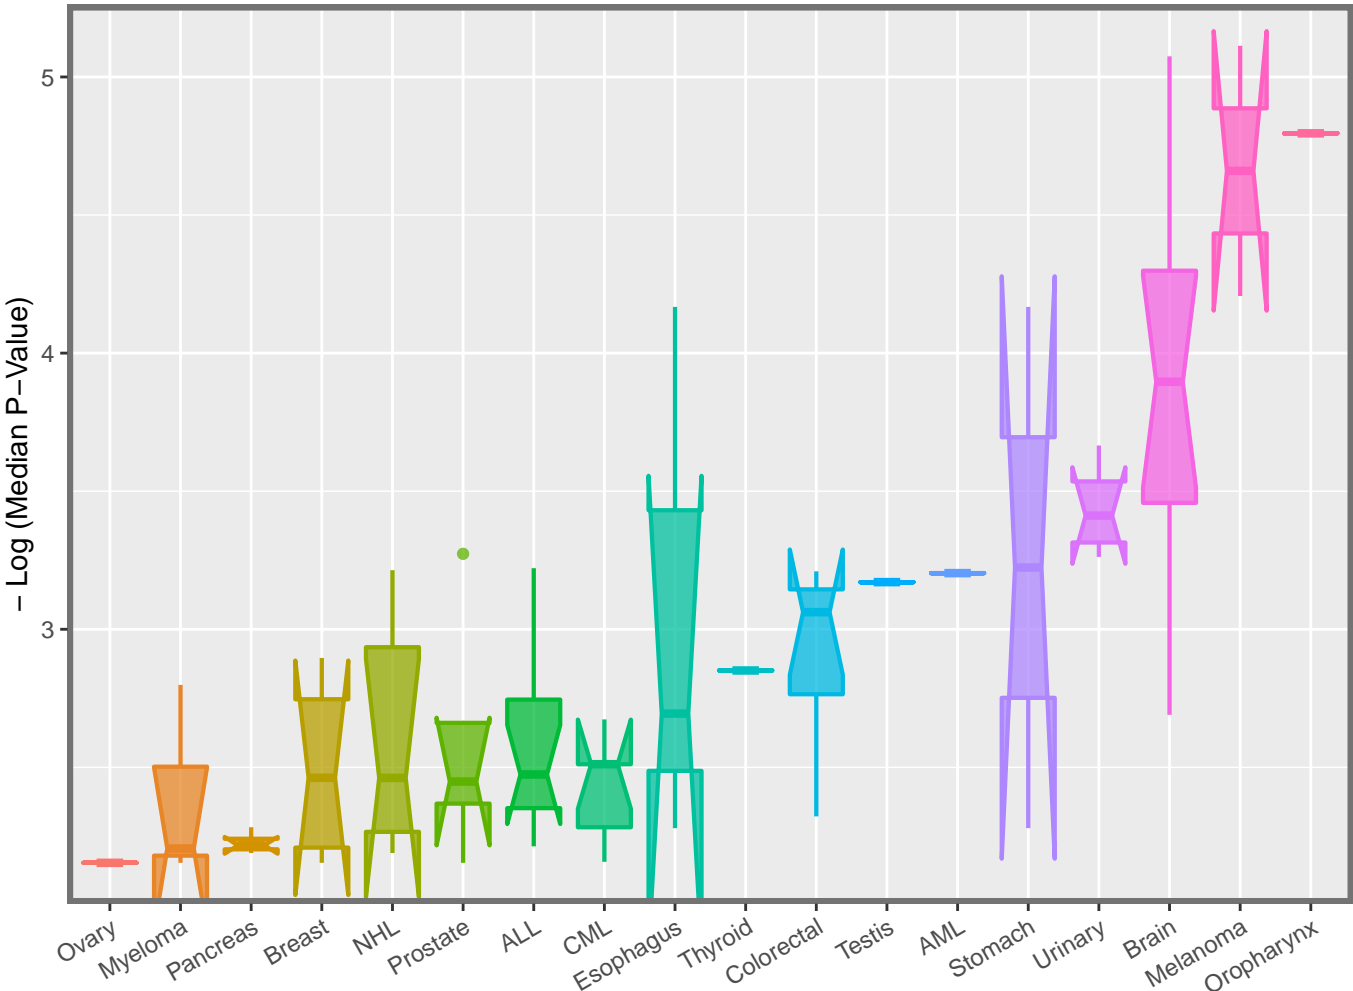

## Supplementary Figure Captions

Supplementary Figure S1. Overall results - negative logarithm of P-Values for congenital anomalies from Schrott Database by organ system.

Supplementary Figure S2. Overall results - negative logarithm of P-Values for congenital anomalies from Schrott Database by organ target.

Supplementary Figure S3. Overall results – Boxplot of negative logarithm of grouped P-Values for congenital anomalies from Schrott Database comparing cannabis dependency with cannabis withdrawal.

Supplementary Figure S4. Number of genes annotated in the Schrott database for target organs by dependency status in (A) cannabis dependence and (B) withdrawal.

Supplementary Figure S5. (A) Numbers of gene annotations, (B) numbers of genes affected and (C) negative logarithm of P-value by cancer type - overall Schrott data.

Supplementary Figure S6. Direct comparison between P-values for cannabis-cancer relationships between (A) cannabis dependence and (B) cannabis withdrawal, Schrott data.
